# Supplementary material for: Antimicrobial activity and cytotoxicity of polyketides isolated from the mushroom Xerula sp. BCC56836
Source: Royal Society of Chemistry journal article supplement (doi:10.1039/c6ra21898a), 2016-01-01
Supplement: c6ra21898a1.pdf [file c6ra21898a1.pdf]

## Supporting information

### **Antimicrobial activity and cytotoxicity of polyketides isolated from the mushroom *Xerula* sp. BCC56836**

Karoon Sadorn,<sup>\*a</sup> Siriporn Saepua,<sup>b</sup> Nattawut Boonyuen,<sup>b</sup> Pattiyaa Laksanacharoen,<sup>b</sup> Pranee Rachtawee,<sup>b</sup> Pattama Pittayakhajonwut<sup>b</sup>

*<sup>a</sup>Department of Chemistry, Faculty of Science, King Mongkut's Institute of Technology Ladkrabang, Chalongkrung Road, Ladkrabang, Bangkok 10520, Thailand*

*<sup>b</sup>National Center for Genetic Engineering and Biotechnology (BIOTEC), National Science and Technology Development Agency (NSTDA), Thailand Science Park, Paholyothin Road, Klong Luang, Pathumthani 12120, Thailand*

\*Corresponding author.

Tel.: +66-2-329-8400, ext. 290. Fax: +66-2-329-8428. E-mail: karoon.sa@kmitl.ac.th.

| Contents                                                                                                      | Page |
|---------------------------------------------------------------------------------------------------------------|------|
| <b>Figure S1.</b> $^1\text{H}$ NMR spectrum of compound <b>1</b> (400 MHz, acetone- $d_6$ ).                  | 7    |
| <b>Figure S2.</b> $^{13}\text{C}$ NMR spectrum of compound <b>1</b> (100 MHz, acetone- $d_6$ ).               | 7    |
| <b>Figure S3.</b> $^{13}\text{C}$ NMR and DEPT-135 spectra of compound <b>1</b> (100 MHz, acetone- $d_6$ ).   | 8    |
| <b>Figure S4.</b> HMQC spectrum of compound <b>1</b> (400 MHz, acetone- $d_6$ ).                              | 8    |
| <b>Figure S5.</b> COSY spectrum of compound <b>1</b> (400 MHz, acetone- $d_6$ ).                              | 9    |
| <b>Figure S6.</b> HMBC spectrum of compound <b>1</b> (400 MHz, acetone- $d_6$ ).                              | 9    |
| <b>Figure S7.</b> HRESIMS of compound <b>1</b> .                                                              | 10   |
| <b>Figure S8.</b> $^1\text{H}$ NMR spectrum of compound <b>3</b> (400 MHz, $\text{CDCl}_3$ ).                 | 10   |
| <b>Figure S9.</b> $^{13}\text{C}$ NMR spectrum of compound <b>3</b> (100 MHz, $\text{CDCl}_3$ ).              | 11   |
| <b>Figure S10.</b> $^{13}\text{C}$ NMR and DEPT-135 spectra of compound <b>3</b> (100 MHz, $\text{CDCl}_3$ ). | 11   |
| <b>Figure S11.</b> HMQC spectrum of compound <b>3</b> (400 MHz, $\text{CDCl}_3$ ).                            | 12   |
| <b>Figure S12.</b> COSY spectrum of compound <b>3</b> (400 MHz, $\text{CDCl}_3$ ).                            | 12   |
| <b>Figure S13.</b> HMBC spectrum of compound <b>3</b> (400 MHz, $\text{CDCl}_3$ ).                            | 13   |
| <b>Figure S14.</b> HRESIMS of compound <b>3</b> .                                                             | 13   |
| <b>Figure S15.</b> $^1\text{H}$ NMR spectrum of compound <b>5</b> (500 MHz, acetone- $d_6$ ).                 | 14   |
| <b>Figure S16.</b> $^{13}\text{C}$ NMR spectrum of compound <b>5</b> (125 MHz, acetone- $d_6$ ).              | 14   |
| <b>Figure S17.</b> $^{13}\text{C}$ NMR and DEPT-135 spectra of compound <b>5</b> (125 MHz, acetone- $d_6$ ).  | 15   |
| <b>Figure S18.</b> HMQC spectrum of compound <b>5</b> (500 MHz, acetone- $d_6$ ).                             | 15   |
| <b>Figure S19.</b> COSY spectrum of compound <b>5</b> (500 MHz, acetone- $d_6$ ).                             | 16   |
| <b>Figure S20.</b> HMBC spectrum of compound <b>5</b> (500 MHz, acetone- $d_6$ ).                             | 16   |
| <b>Figure S21.</b> HRESIMS of compound <b>5</b> .                                                             | 17   |
| <b>Figure S22.</b> $^1\text{H}$ NMR spectrum of compound <b>6</b> (400 MHz, acetone- $d_6$ ).                 | 17   |

|                                                                                                              |    |
|--------------------------------------------------------------------------------------------------------------|----|
| <b>Figure S23.</b> $^{13}\text{C}$ NMR spectrum of compound <b>6</b> (100 MHz, acetone- $d_6$ ).             | 18 |
| <b>Figure S24.</b> $^{13}\text{C}$ NMR and DEPT-135 spectra of compound <b>6</b> (100 MHz, acetone- $d_6$ ). | 18 |
| <b>Figure S25.</b> HMQC spectrum of compound <b>6</b> (400 MHz, acetone- $d_6$ ).                            | 19 |
| <b>Figure S26.</b> COSY spectrum of compound <b>6</b> (400 MHz, acetone- $d_6$ ).                            | 19 |
| <b>Figure S27.</b> HMBC spectrum of compound <b>6</b> (400 MHz, acetone- $d_6$ ).                            | 20 |
| <b>Figure S28.</b> NOESY spectrum of compound <b>6</b> (400 MHz, acetone- $d_6$ ).                           | 20 |
| <b>Figure S29.</b> HRESIMS of compound <b>6</b> .                                                            | 21 |
| <b>Figure S30.</b> $^1\text{H}$ NMR spectrum of compound <b>7</b> (400 MHz, acetone- $d_6$ ).                | 21 |
| <b>Figure S31.</b> $^{13}\text{C}$ NMR spectrum of compound <b>7</b> (100 MHz, acetone- $d_6$ ).             | 22 |
| <b>Figure S32.</b> $^{13}\text{C}$ NMR and DEPT-135 spectra of compound <b>7</b> (100 MHz, acetone- $d_6$ ). | 22 |
| <b>Figure S33.</b> HMQC spectrum of compound <b>7</b> (400 MHz, acetone- $d_6$ ).                            | 23 |
| <b>Figure S34.</b> COSY spectrum of compound <b>7</b> (400 MHz, acetone- $d_6$ ).                            | 23 |
| <b>Figure S35.</b> HMBC spectrum of compound <b>7</b> (400 MHz, acetone- $d_6$ ).                            | 24 |
| <b>Figure S36.</b> NOESY spectrum of compound <b>7</b> (400 MHz, acetone- $d_6$ ).                           | 24 |
| <b>Figure S37.</b> HRESIMS of compound <b>7</b> .                                                            | 25 |
| <b>Figure S38.</b> $^1\text{H}$ NMR spectrum of compound <b>8</b> (400 MHz, acetone- $d_6$ ).                | 25 |
| <b>Figure S39.</b> $^{13}\text{C}$ NMR spectrum of compound <b>8</b> (100 MHz, acetone- $d_6$ ).             | 26 |
| <b>Figure S40.</b> $^{13}\text{C}$ NMR and DEPT-135 spectra of compound <b>8</b> (100 MHz, acetone- $d_6$ ). | 26 |
| <b>Figure S41.</b> HMQC spectrum of compound <b>8</b> (400 MHz, acetone- $d_6$ ).                            | 27 |
| <b>Figure S42.</b> COSY spectrum of compound <b>8</b> (400 MHz, acetone- $d_6$ ).                            | 27 |
| <b>Figure S43.</b> HMBC spectrum of compound <b>8</b> (400 MHz, acetone- $d_6$ ).                            | 28 |
| <b>Figure S44.</b> HRESIMS of compound <b>8</b> .                                                            | 28 |
| <b>Figure S45.</b> $^1\text{H}$ NMR spectrum of compound <b>9</b> (500 MHz, acetone- $d_6$ ).                | 29 |

|                                                                                                               |    |
|---------------------------------------------------------------------------------------------------------------|----|
| <b>Figure S46.</b> $^{13}\text{C}$ NMR spectrum of compound <b>9</b> (125 MHz, acetone- $d_6$ ).              | 29 |
| <b>Figure S47.</b> $^{13}\text{C}$ NMR and DEPT-135 spectra of compound <b>9</b> (125 MHz, acetone- $d_6$ ).  | 30 |
| <b>Figure S48.</b> HMQC spectrum of compound <b>9</b> (500 MHz, acetone- $d_6$ ).                             | 30 |
| <b>Figure S49.</b> COSY spectrum of compound <b>9</b> (500 MHz, acetone- $d_6$ ).                             | 31 |
| <b>Figure S50.</b> HMBC spectrum of compound <b>9</b> (500 MHz, acetone- $d_6$ ).                             | 31 |
| <b>Figure S51.</b> HRESIMS of compound <b>9</b> .                                                             | 32 |
| <b>Figure S52.</b> $^1\text{H}$ NMR spectrum of compound <b>10</b> (400 MHz, acetone- $d_6$ ).                | 32 |
| <b>Figure S53.</b> $^{13}\text{C}$ NMR spectrum of compound <b>10</b> (100 MHz, acetone- $d_6$ ).             | 33 |
| <b>Figure S54.</b> $^{13}\text{C}$ NMR and DEPT-135 spectra of compound <b>10</b> (100 MHz, acetone- $d_6$ ). | 33 |
| <b>Figure S55.</b> HMQC spectrum of compound <b>10</b> (400 MHz, acetone- $d_6$ ).                            | 34 |
| <b>Figure S56.</b> COSY spectrum of compound <b>10</b> (400 MHz, acetone- $d_6$ ).                            | 34 |
| <b>Figure S57.</b> HMBC spectrum of compound <b>10</b> (400 MHz, acetone- $d_6$ ).                            | 35 |
| <b>Figure S58.</b> HRESIMS of compound <b>10</b> .                                                            | 35 |
| <b>Figure S59.</b> $^1\text{H}$ NMR spectrum of compound <b>11</b> (400 MHz, acetone- $d_6$ ).                | 36 |
| <b>Figure S60.</b> $^{13}\text{C}$ NMR spectrum of compound <b>11</b> (100 MHz, acetone- $d_6$ ).             | 36 |
| <b>Figure S61.</b> $^{13}\text{C}$ NMR and DEPT-135 spectra of compound <b>11</b> (100 MHz, acetone- $d_6$ ). | 37 |
| <b>Figure S62.</b> HMQC spectrum of compound <b>11</b> (400 MHz, acetone- $d_6$ ).                            | 37 |
| <b>Figure S63.</b> COSY spectrum of compound <b>11</b> (400 MHz, acetone- $d_6$ ).                            | 38 |
| <b>Figure S64.</b> HMBC spectrum of compound <b>11</b> (400 MHz, acetone- $d_6$ ).                            | 38 |
| <b>Figure S65.</b> HRESIMS of compound <b>11</b> .                                                            | 39 |
| <b>Figure S66.</b> $^1\text{H}$ NMR spectrum of compound <b>12</b> (400 MHz, acetone- $d_6$ ).                | 39 |
| <b>Figure S67.</b> $^{13}\text{C}$ NMR spectrum of compound <b>12</b> (100 MHz, acetone- $d_6$ ).             | 40 |
| <b>Figure S68.</b> $^{13}\text{C}$ NMR and DEPT-135 spectra of compound <b>12</b> (100 MHz, acetone- $d_6$ ). | 40 |



|                                                                                                               |    |
|---------------------------------------------------------------------------------------------------------------|----|
| <b>Figure S69.</b> HMQC spectrum of compound <b>12</b> (400 MHz, acetone- $d_6$ ).                            | 41 |
| <b>Figure S70.</b> COSY spectrum of compound <b>12</b> (400 MHz, acetone- $d_6$ ).                            | 41 |
| <b>Figure S71.</b> HMBC spectrum of compound <b>12</b> (400 MHz, acetone- $d_6$ ).                            | 42 |
| <b>Figure S72.</b> HRESIMS of compound <b>12</b> .                                                            | 42 |
| <b>Figure S73.</b> $^1\text{H}$ NMR spectrum of compound <b>14</b> (500 MHz, acetone- $d_6$ ).                | 43 |
| <b>Figure S74.</b> $^{13}\text{C}$ NMR spectrum of compound <b>14</b> (125 MHz, acetone- $d_6$ ).             | 43 |
| <b>Figure S75.</b> $^{13}\text{C}$ NMR and DEPT-135 spectra of compound <b>14</b> (125 MHz, acetone- $d_6$ ). | 44 |
| <b>Figure S76.</b> HMQC spectrum of compound <b>14</b> (500 MHz, acetone- $d_6$ ).                            | 44 |
| <b>Figure S77.</b> COSY spectrum of compound <b>14</b> (500 MHz, acetone- $d_6$ ).                            | 45 |
| <b>Figure S78.</b> HMBC spectrum of compound <b>14</b> (500 MHz, acetone- $d_6$ ).                            | 45 |
| <b>Figure S79.</b> NOESY spectrum of compound <b>14</b> (500 MHz, acetone- $d_6$ ).                           | 46 |
| <b>Figure S80.</b> HRESIMS of compound <b>14</b> .                                                            | 46 |
| <b>Figure S81.</b> $^1\text{H}$ NMR spectrum of compound <b>15</b> (500 MHz, acetone- $d_6$ ).                | 47 |
| <b>Figure S82.</b> $^{13}\text{C}$ NMR spectrum of compound <b>15</b> (125 MHz, acetone- $d_6$ ).             | 47 |
| <b>Figure S83.</b> $^{13}\text{C}$ NMR and DEPT-135 spectra of compound <b>15</b> (125 MHz, acetone- $d_6$ ). | 48 |
| <b>Figure S84.</b> HMQC spectrum of compound <b>15</b> (500 MHz, acetone- $d_6$ ).                            | 48 |
| <b>Figure S85.</b> COSY spectrum of compound <b>15</b> (500 MHz, acetone- $d_6$ ).                            | 49 |
| <b>Figure S86.</b> HMBC spectrum of compound <b>15</b> (500 MHz, acetone- $d_6$ ).                            | 49 |
| <b>Figure S87.</b> NOESY spectrum of compound <b>15</b> (500 MHz, acetone- $d_6$ ).                           | 50 |
| <b>Figure S88.</b> HRESIMS of compound <b>15</b> .                                                            | 50 |
| <b>Figure S89.</b> $^1\text{H}$ NMR spectrum of compound <b>16</b> (400 MHz, acetone- $d_6$ ).                | 51 |
| <b>Figure S90.</b> $^{13}\text{C}$ NMR spectrum of compound <b>16</b> (100 MHz, acetone- $d_6$ ).             | 51 |
| <b>Figure S91.</b> $^{13}\text{C}$ NMR and DEPT-135 spectra of compound <b>16</b> (100 MHz, acetone- $d_6$ ). | 52 |

|                                                                                     |    |
|-------------------------------------------------------------------------------------|----|
| <b>Figure S92.</b> HMQC spectrum of compound <b>16</b> (400 MHz, acetone- $d_6$ ).  | 52 |
| <b>Figure S93.</b> COSY spectrum of compound <b>16</b> (400 MHz, acetone- $d_6$ ).  | 53 |
| <b>Figure S94.</b> HMBC spectrum of compound <b>16</b> (400 MHz, acetone- $d_6$ ).  | 53 |
| <b>Figure S95.</b> NOESY spectrum of compound <b>16</b> (400 MHz, acetone- $d_6$ ). | 54 |
| <b>Figure S96.</b> HRESIMS of compound <b>16</b> .                                  | 54 |

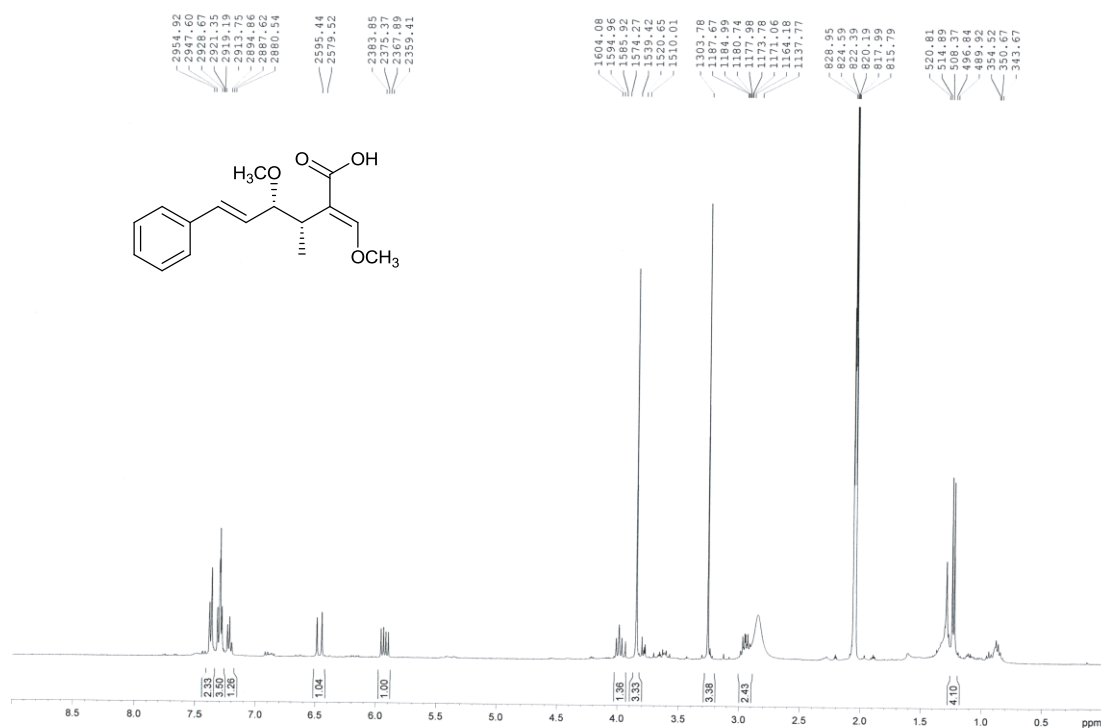

**Figure S1.** <sup>1</sup>H NMR spectrum of compound **1** (400 MHz, acetone-*d*<sub>6</sub>).

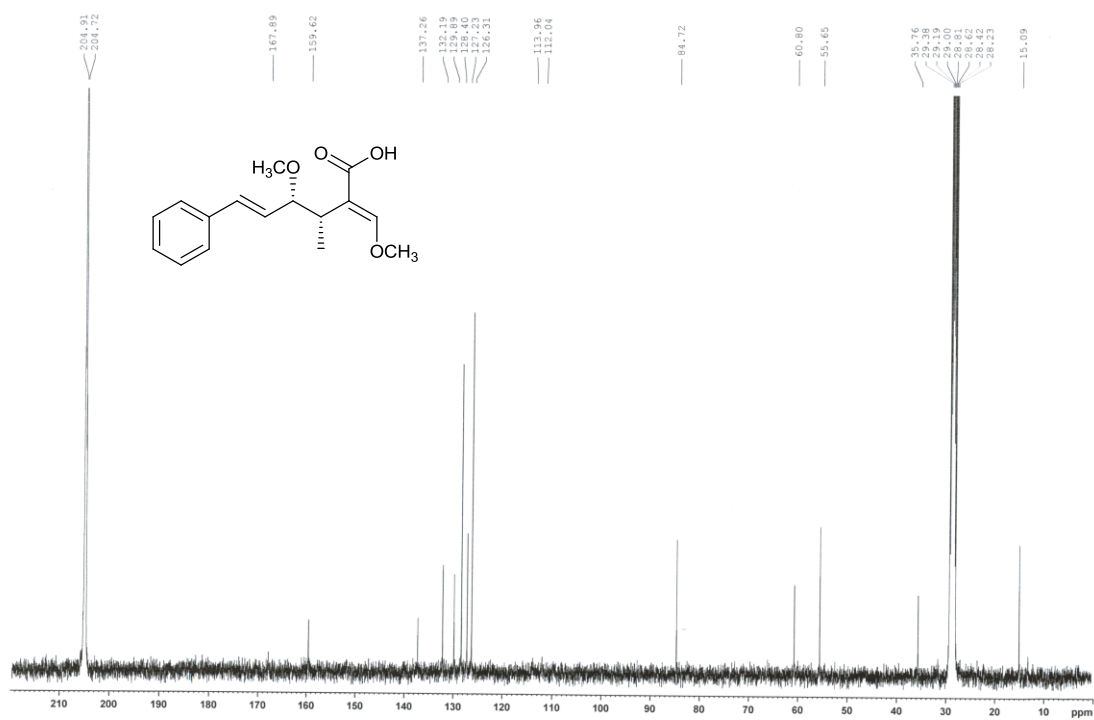

**Figure S2.** <sup>13</sup>C NMR spectrum of compound **1** (100 MHz, acetone-*d*<sub>6</sub>).

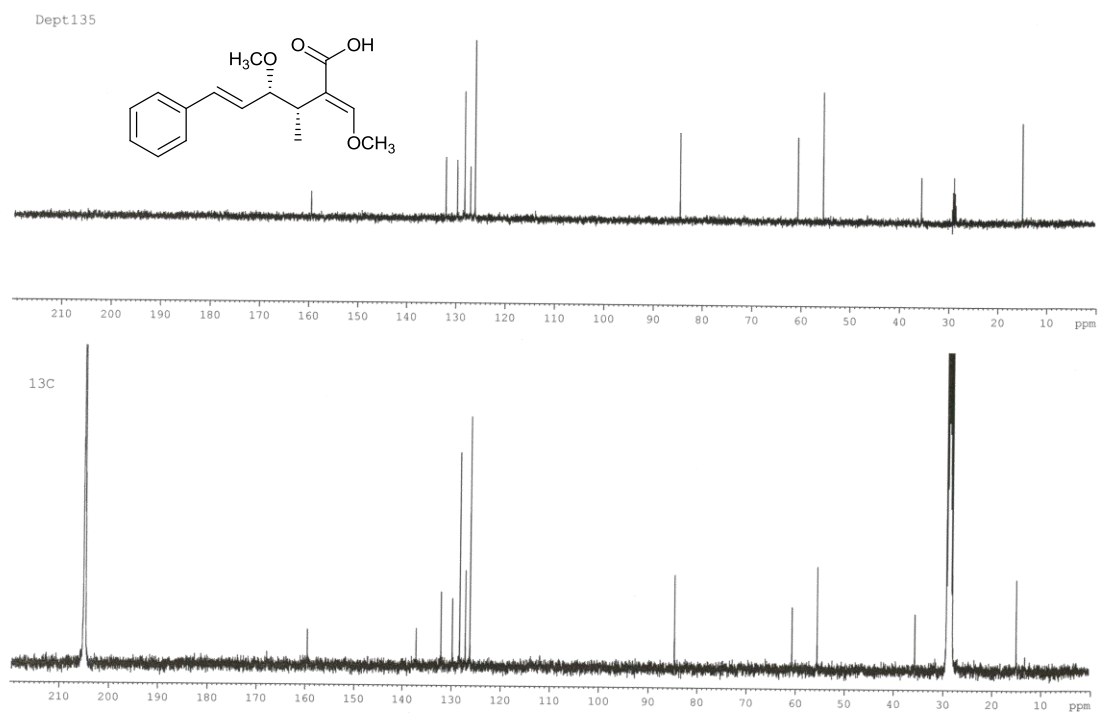

**Figure S3.**  $^{13}\text{C}$  NMR and DEPT-135 spectra of compound **1** (100 MHz, acetone- $d_6$ ).

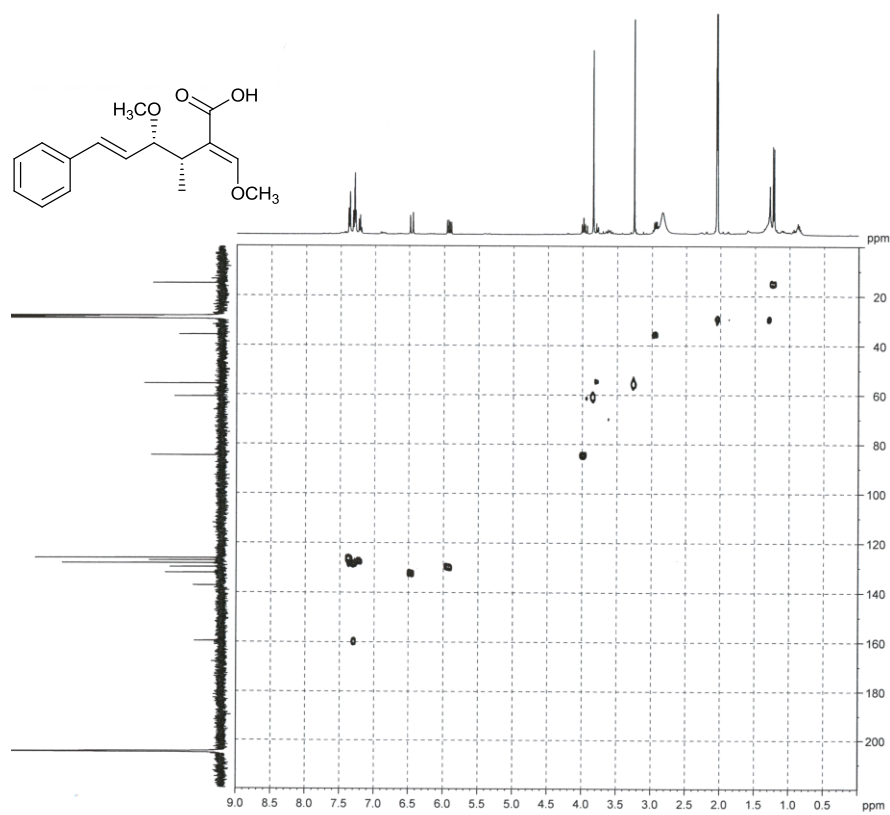

**Figure S4.** HMQC spectrum of compound **1** (400 MHz, acetone- $d_6$ ).

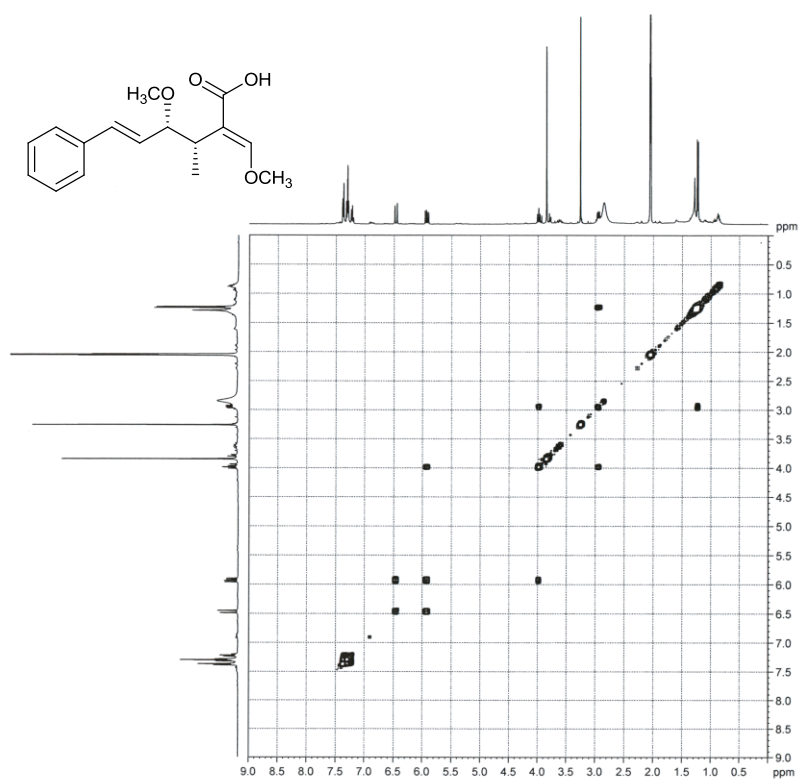

**Figure S5.** COSY spectrum of compound **1** (400 MHz, acetone- $d_6$ ).

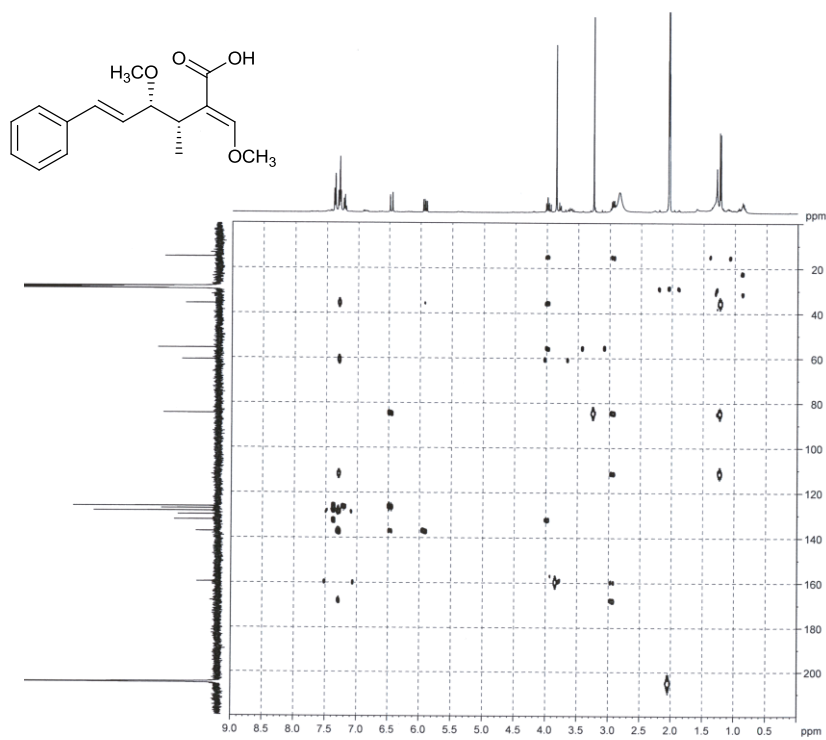

**Figure S6.** HMBC spectrum of compound **1** (400 MHz, acetone- $d_6$ ).

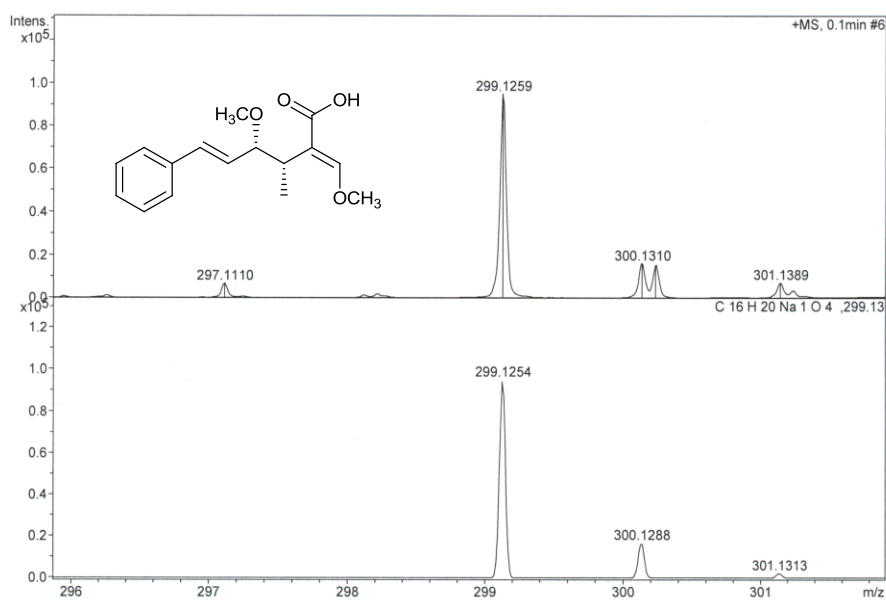

**Figure S7.** HRESIMS of compound **1**.

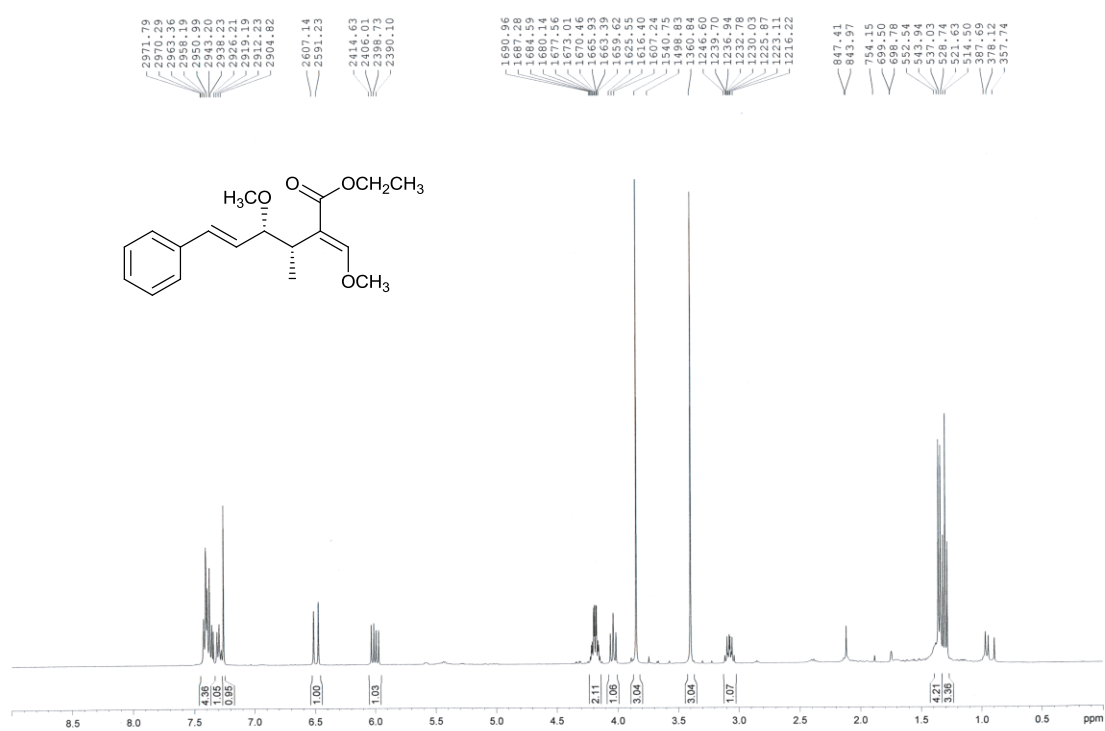

**Figure S8.** <sup>1</sup>H NMR spectrum of compound **3** (400 MHz, CDCl<sub>3</sub>).

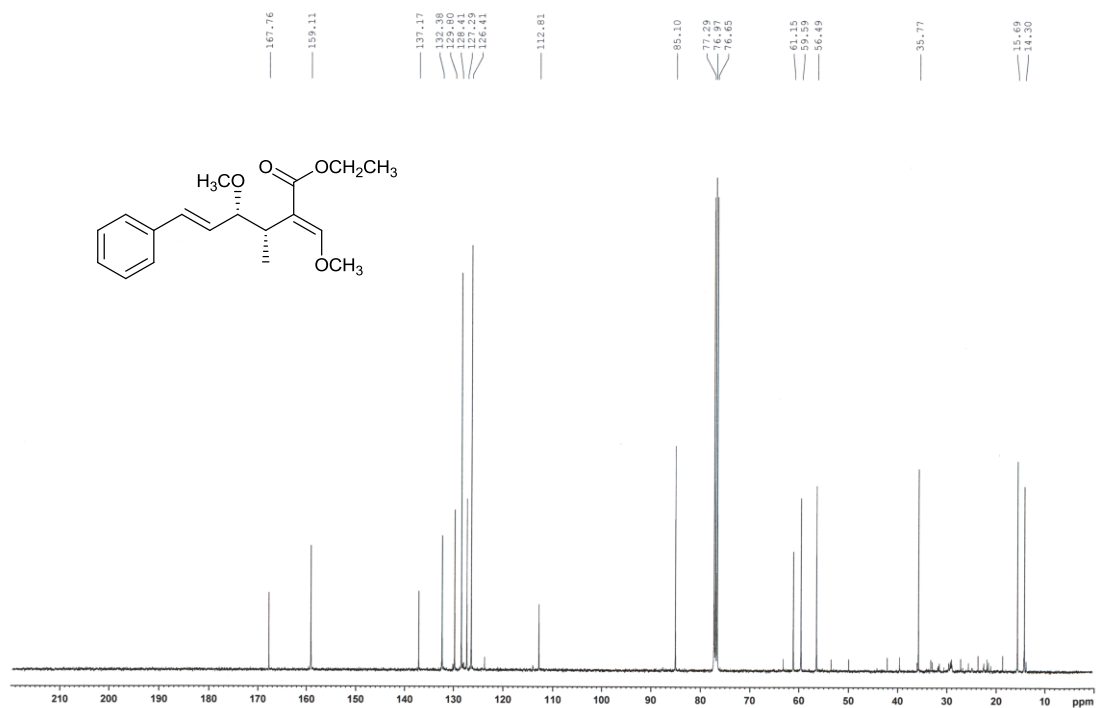

**Figure S9.**  $^{13}\text{C}$  NMR spectrum of compound **3** (100 MHz,  $\text{CDCl}_3$ ).

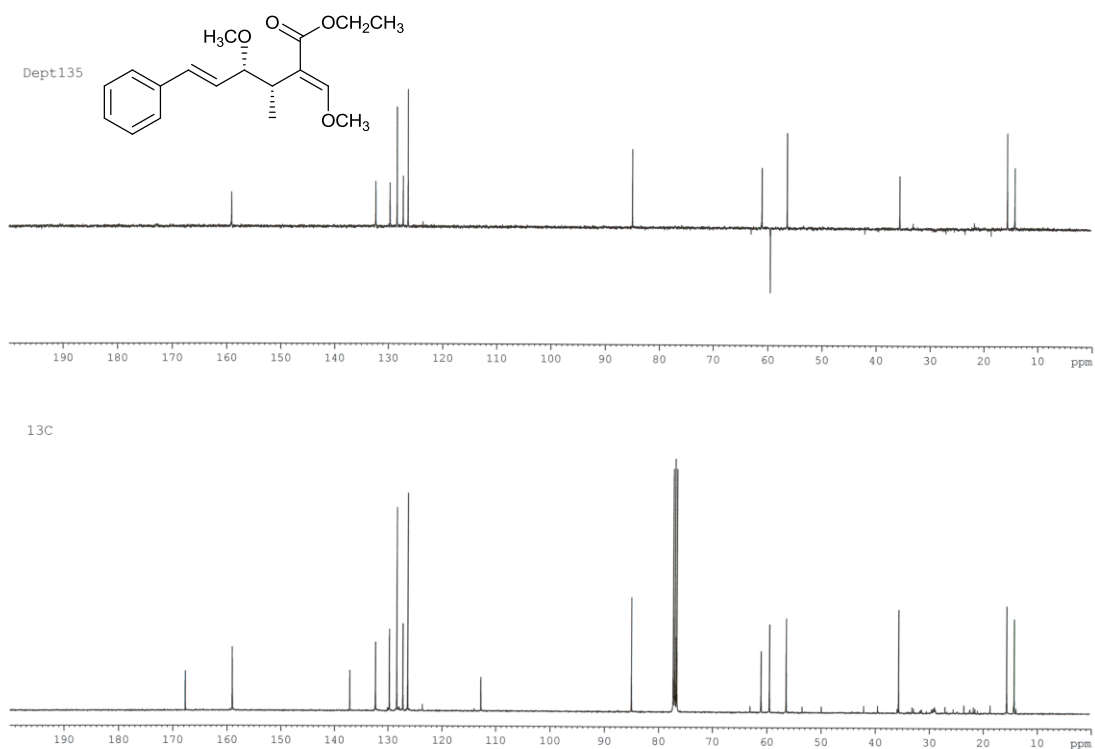

**Figure S10.**  $^{13}\text{C}$  NMR and DEPT-135 spectra of compound **3** (100 MHz,  $\text{CDCl}_3$ ).

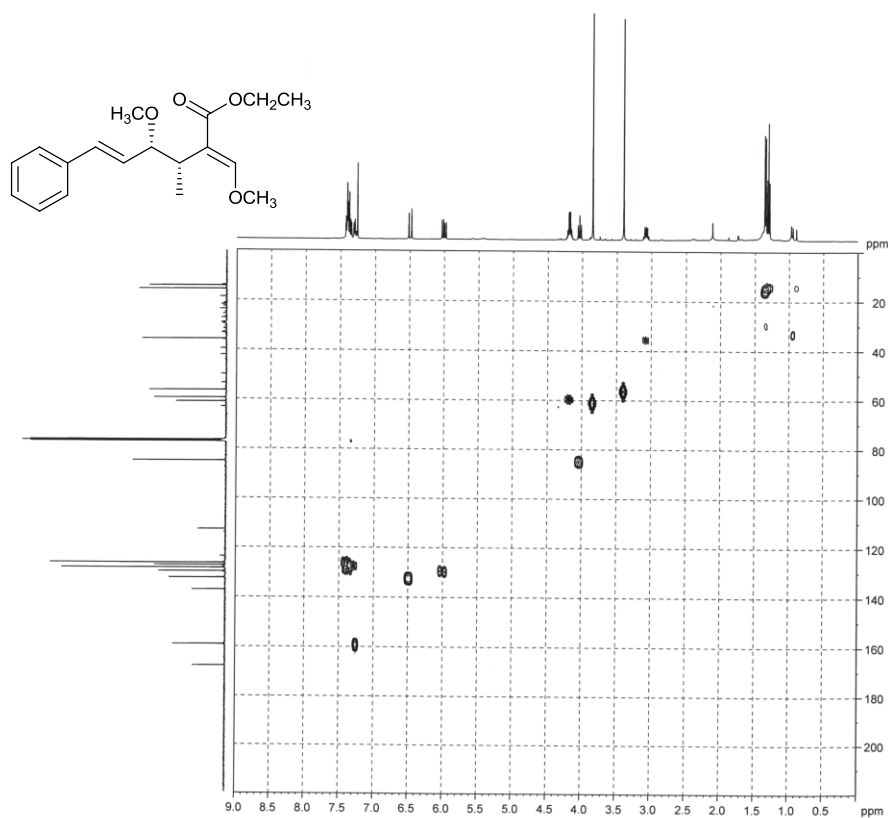

**Figure S11.** HMQC spectrum of compound **3** (400 MHz, CDCl<sub>3</sub>).

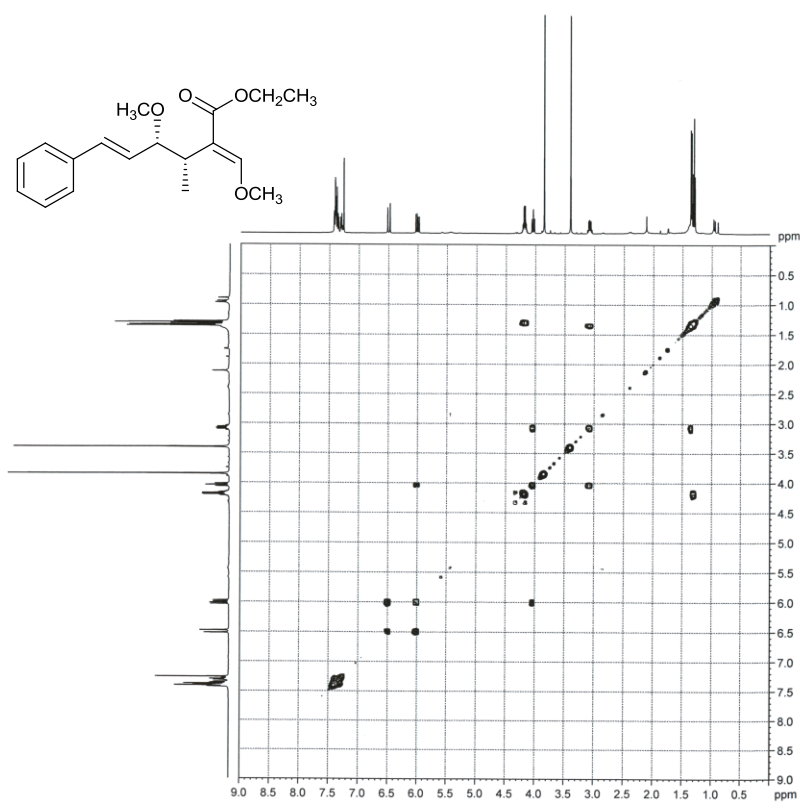

**Figure S12.** COSY spectrum of compound **3** (400 MHz, CDCl<sub>3</sub>).



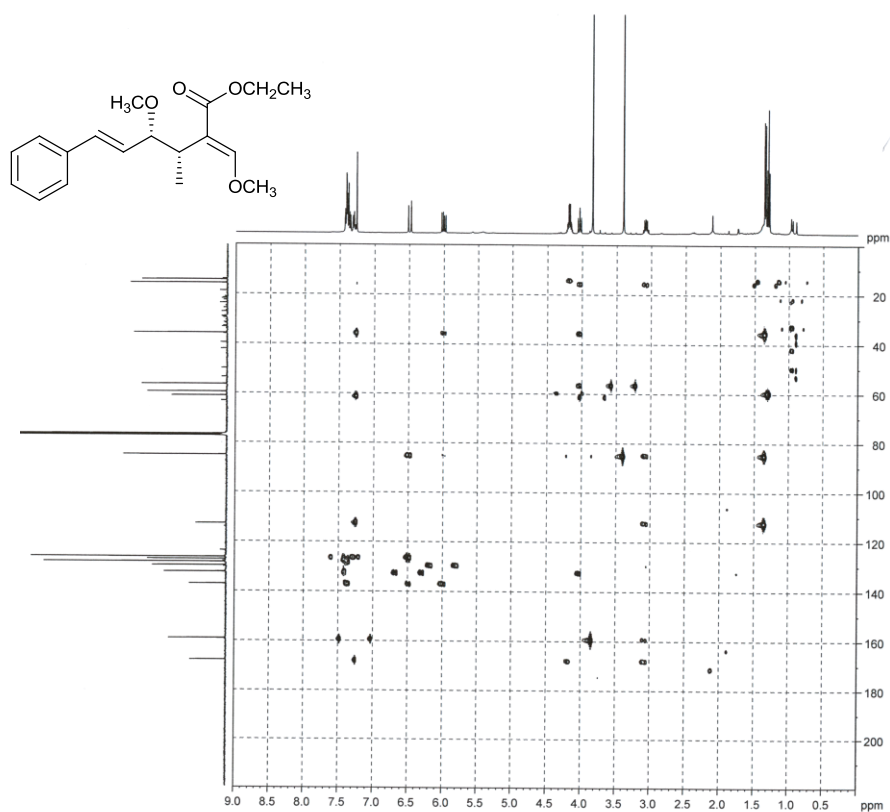

**Figure S13.** HMBC spectrum of compound **3** (400 MHz, CDCl<sub>3</sub>).

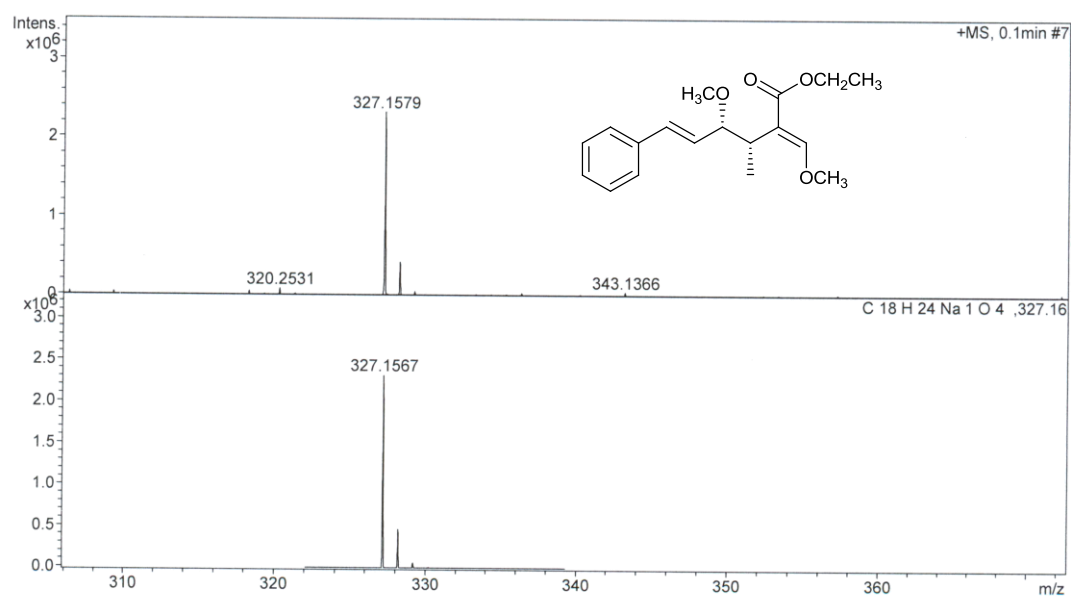

**Figure S14.** HRESIMS of compound **3**.



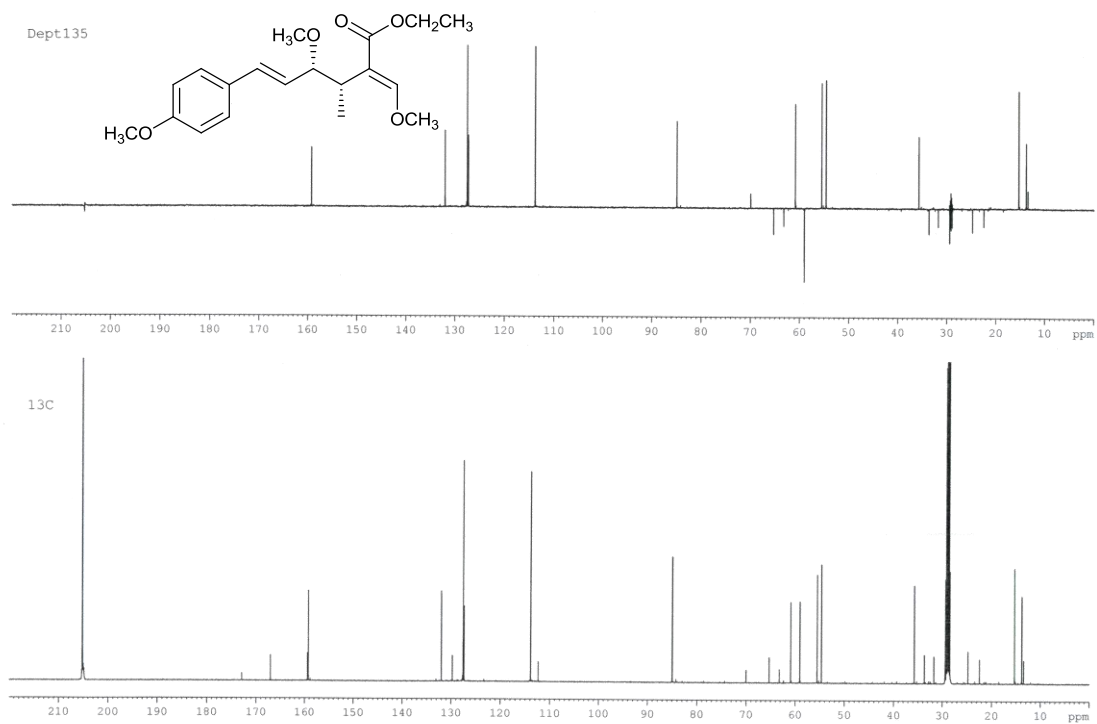

**Figure S17.**  $^{13}\text{C}$  NMR and DEPT-135 spectra of compound **5** (125 MHz, acetone- $d_6$ ).

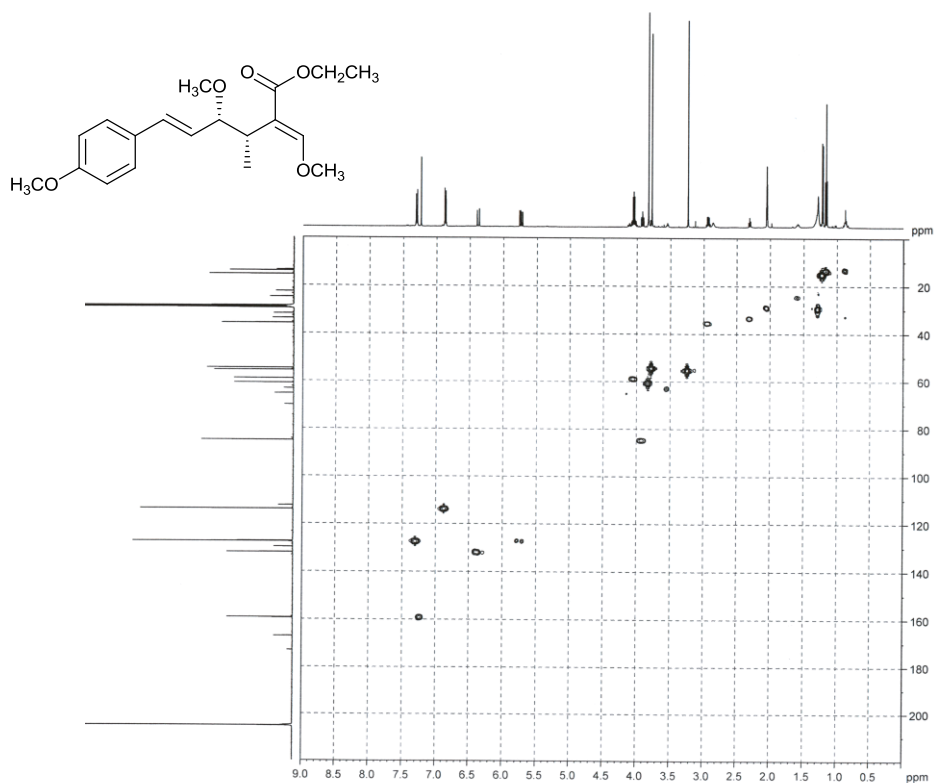

**Figure S18.** HMQC spectrum of compound **5** (500 MHz, acetone- $d_6$ ).

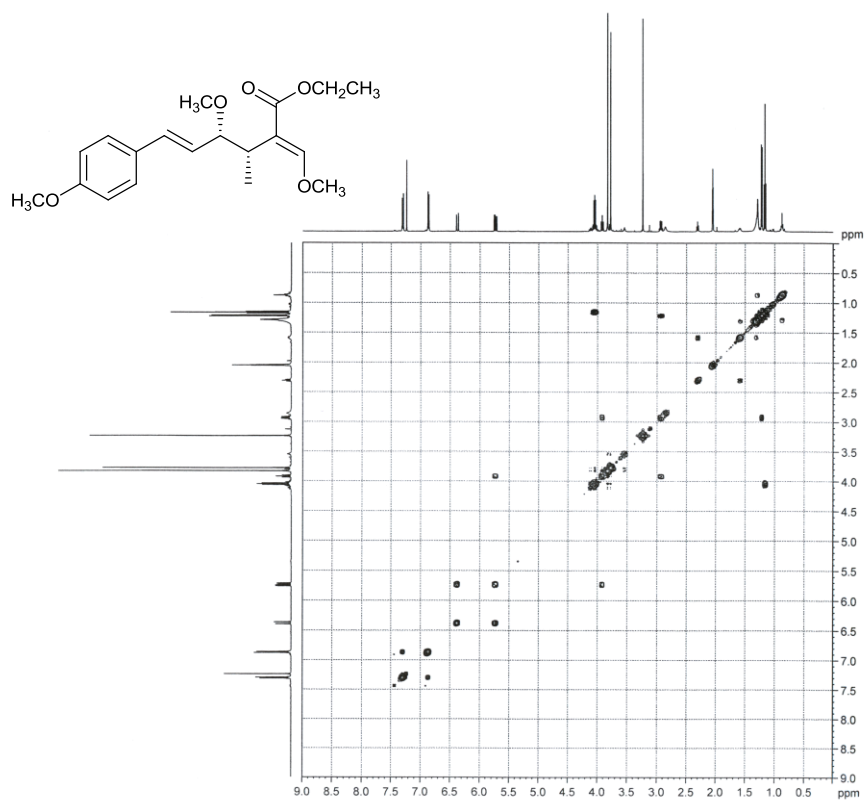

**Figure S19.** COSY spectrum of compound **5** (500 MHz, acetone- $d_6$ ).

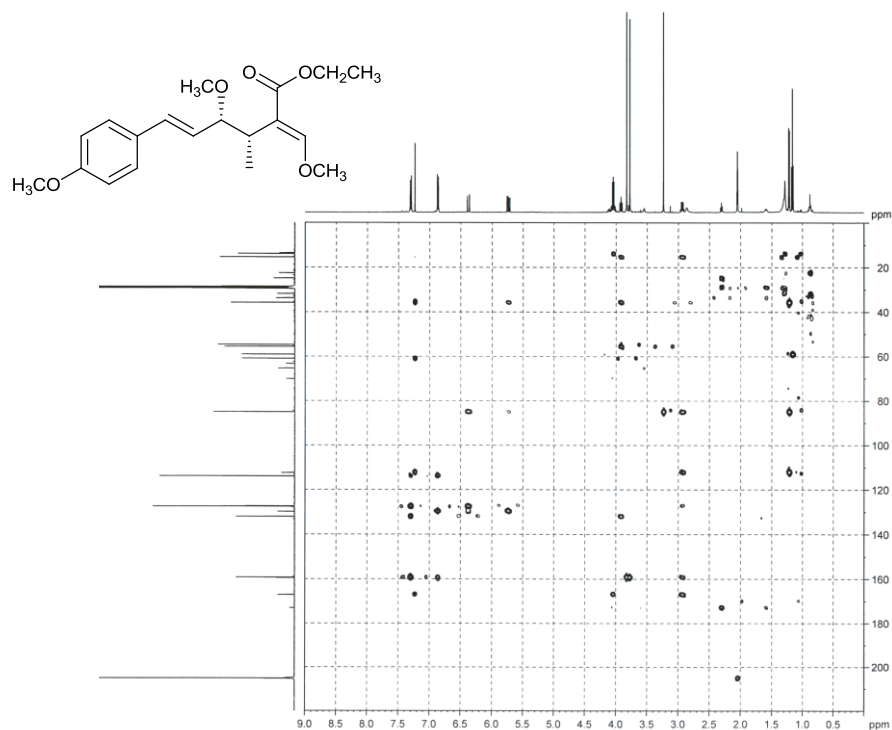

**Figure S20.** HMBC spectrum of compound **5** (500 MHz, acetone- $d_6$ ).



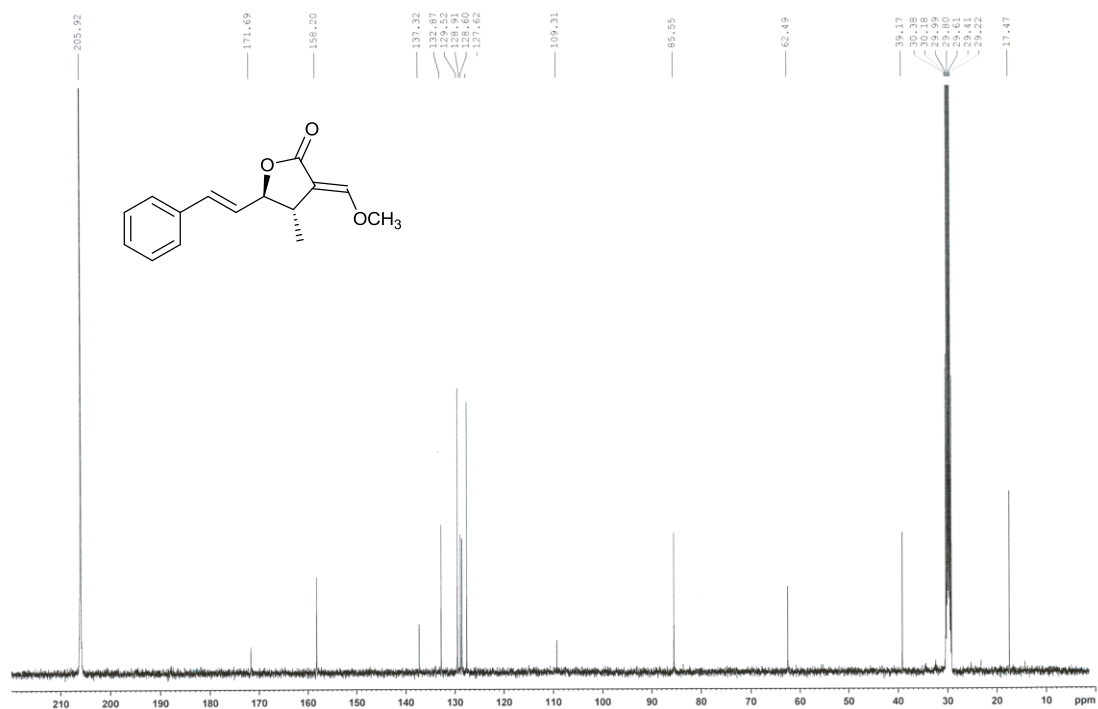

**Figure S23.** <sup>13</sup>C NMR spectrum of compound **6** (100 MHz, acetone-*d*<sub>6</sub>).

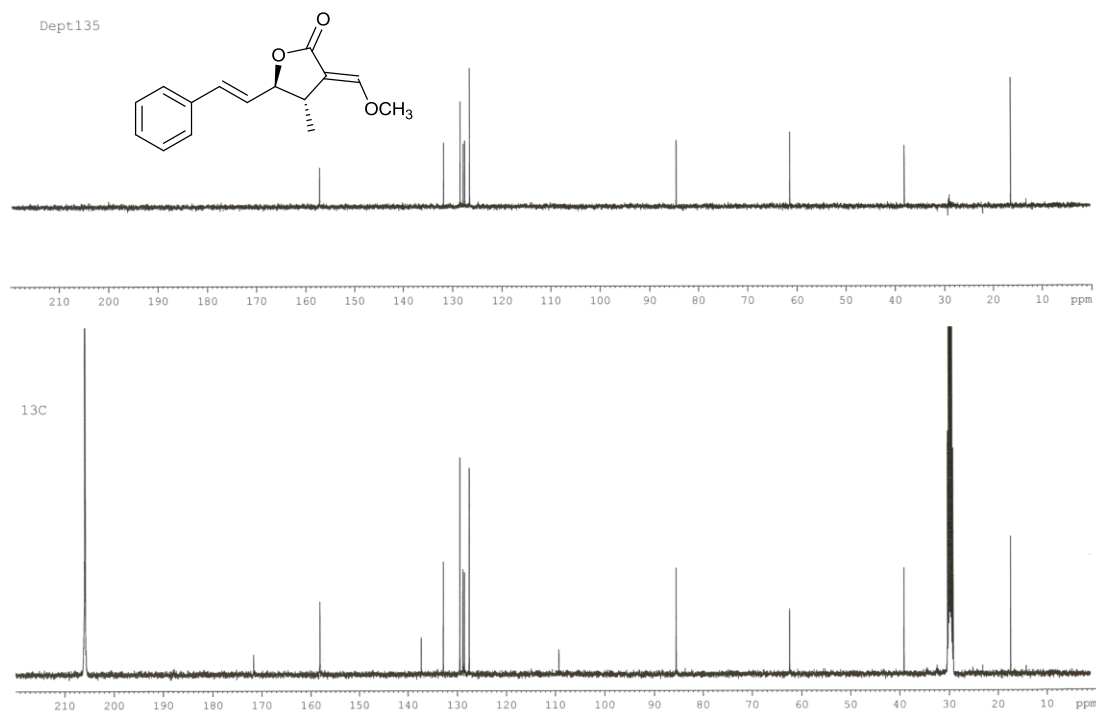

**Figure S24.** <sup>13</sup>C NMR and DEPT-135 spectra of compound **6** (100 MHz, acetone-*d*<sub>6</sub>).

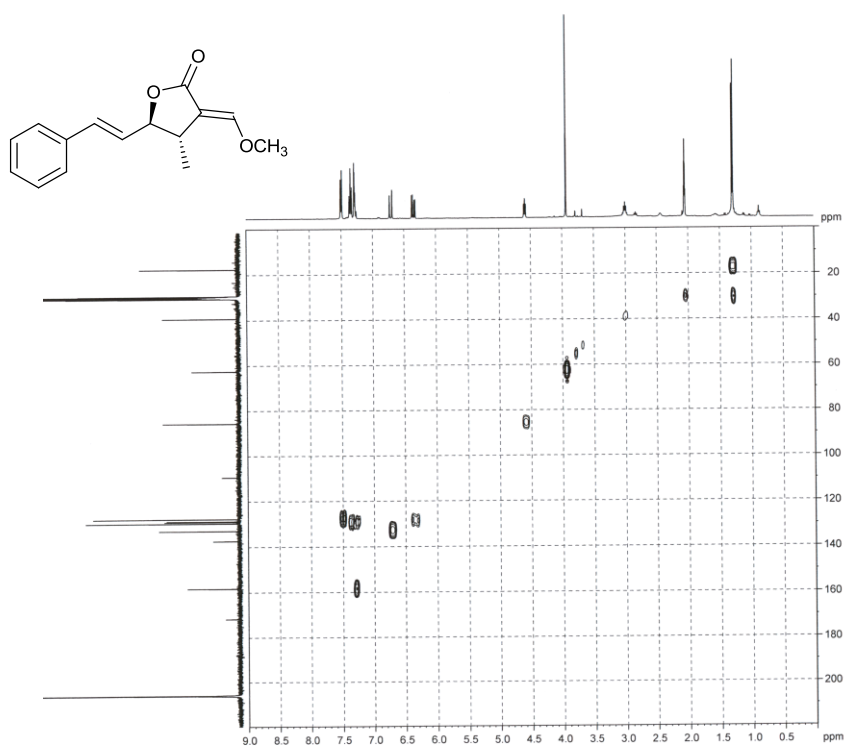

**Figure S25.** HMQC spectrum of compound **6** (400 MHz, acetone- $d_6$ ).

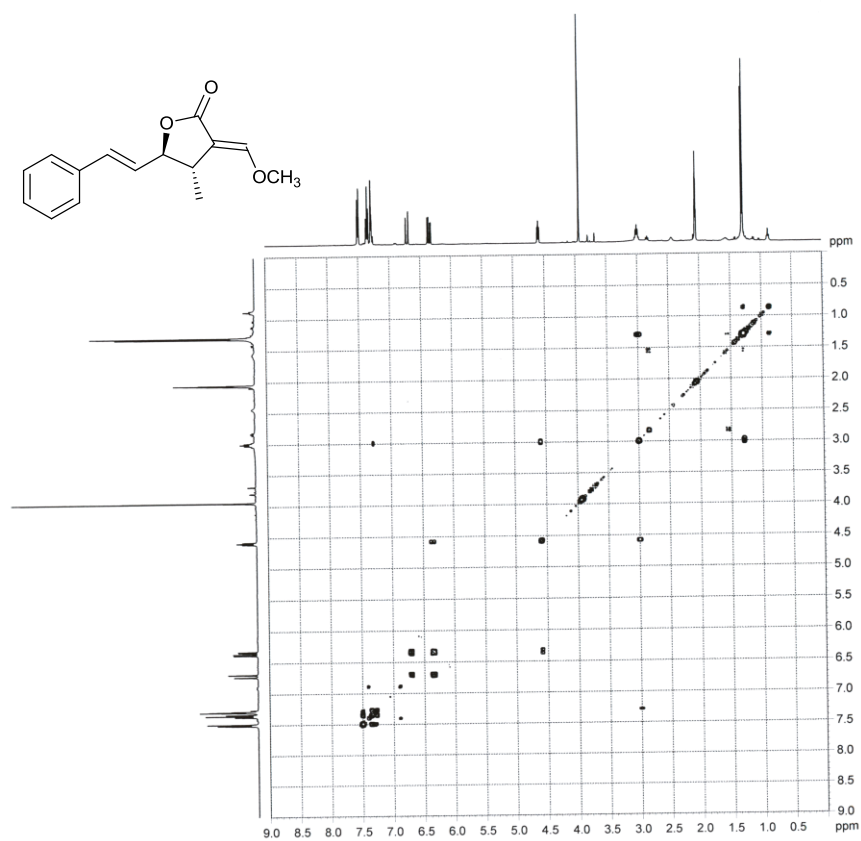

**Figure S26.** COSY spectrum of compound **6** (400 MHz, acetone- $d_6$ ).

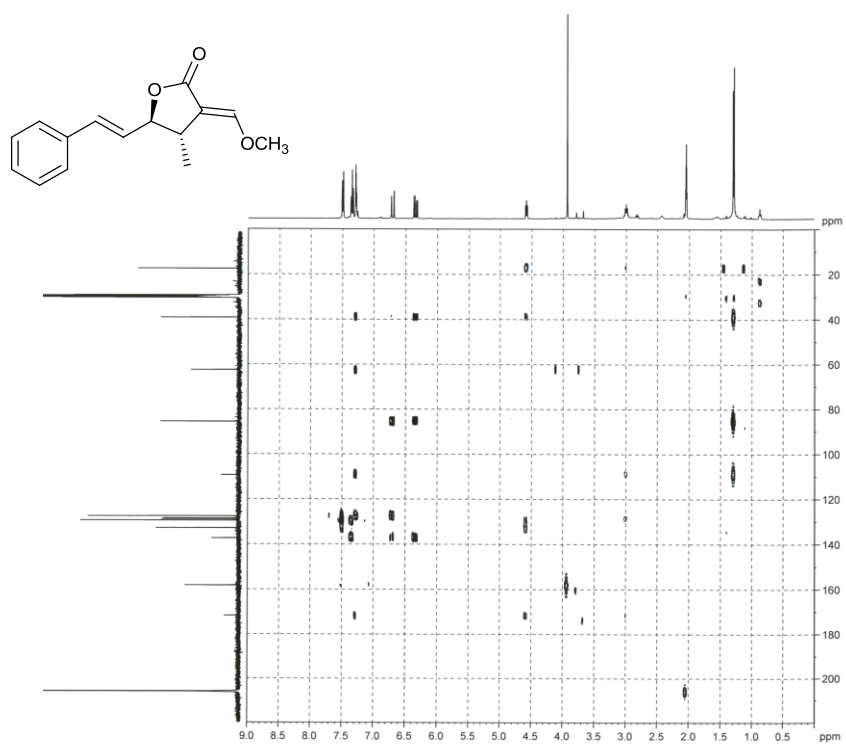

**Figure S27.** HMBC spectrum of compound **6** (400 MHz, acetone- $d_6$ ).

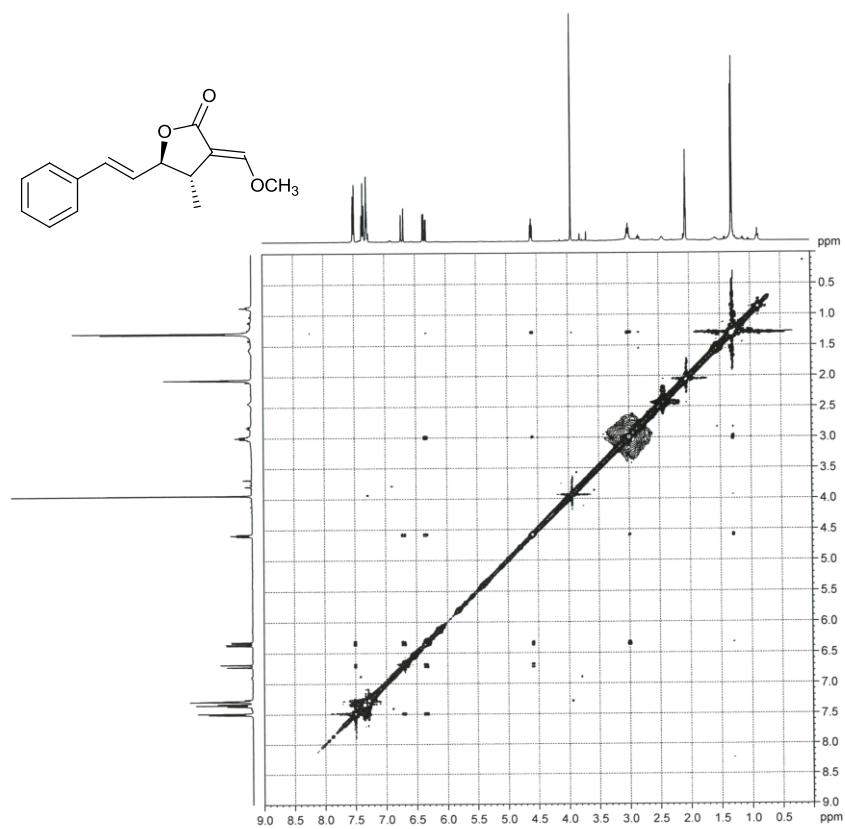

**Figure S28.** NOESY spectrum of compound **6** (400 MHz, acetone- $d_6$ ).



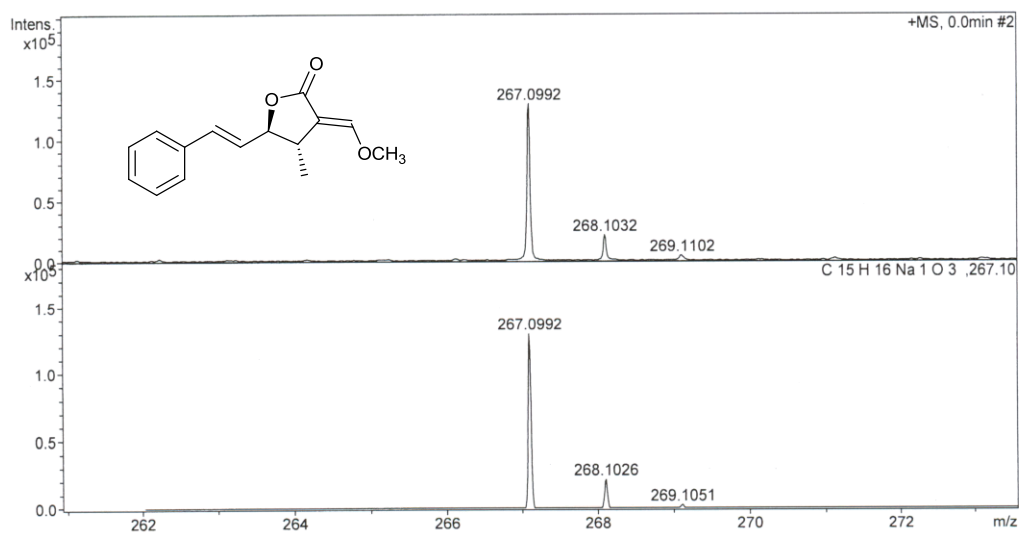

**Figure S29.** HRESIMS of compound **6**.

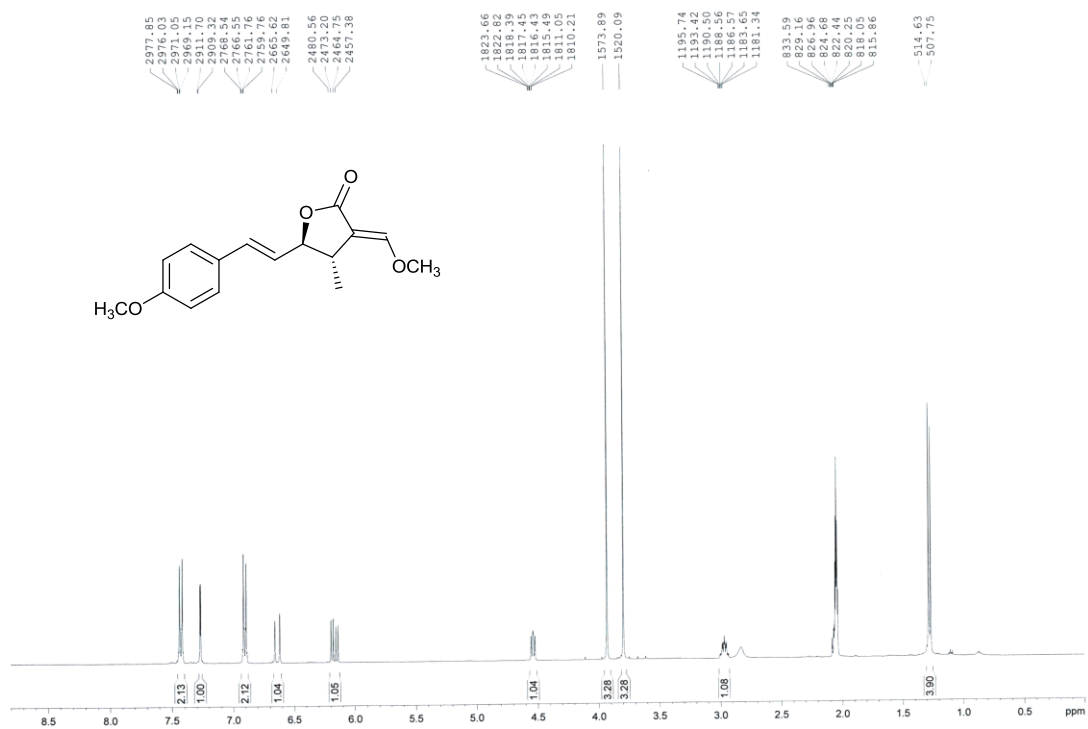

**Figure S30.** <sup>1</sup>H NMR spectrum of compound **7** (400 MHz, acetone-d<sub>6</sub>).

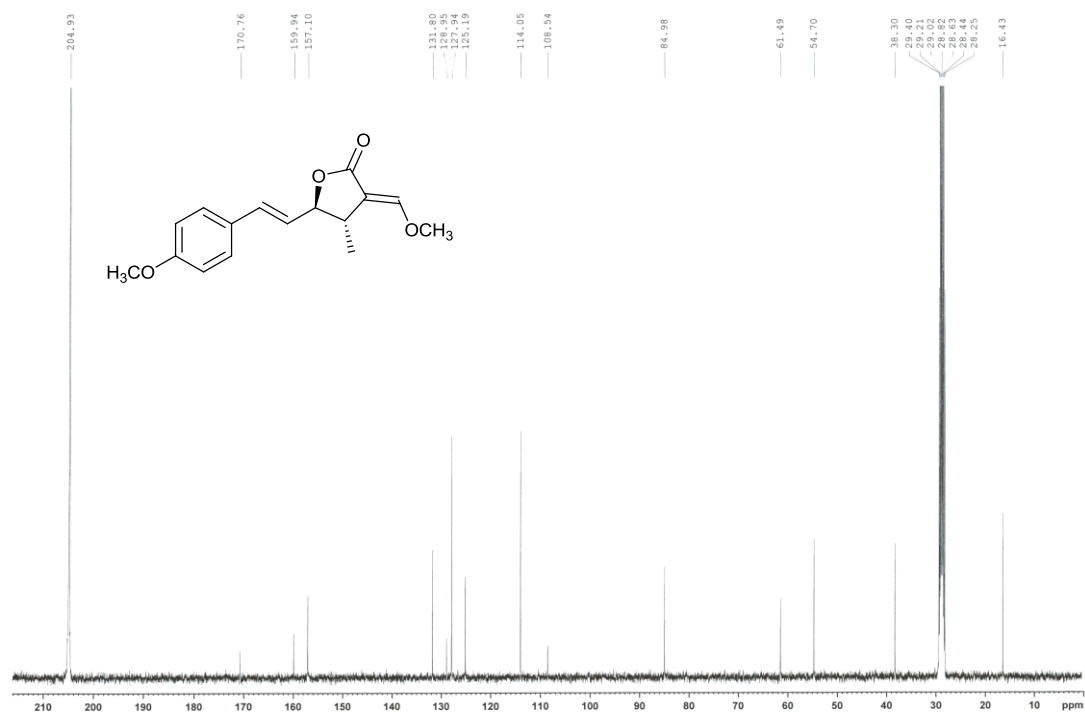

**Figure S31.** <sup>13</sup>C NMR spectrum of compound **7** (100 MHz, acetone-*d*<sub>6</sub>).

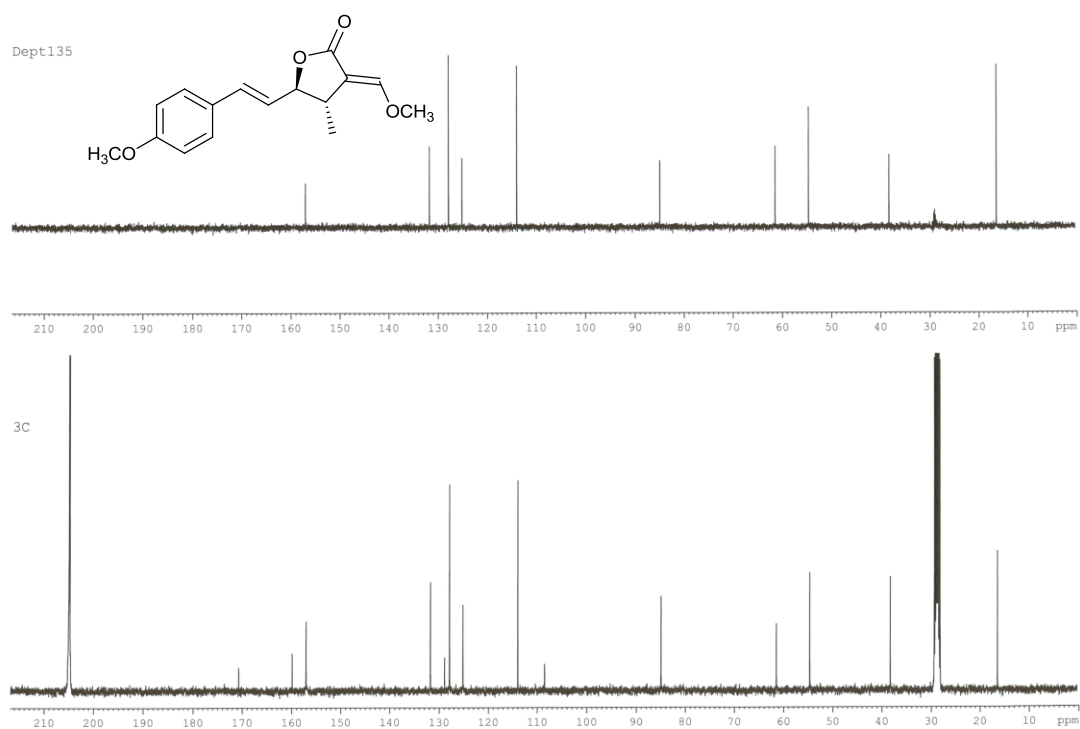

**Figure S32.** <sup>13</sup>C NMR and DEPT-135 spectra of compound **7** (100 MHz, acetone-*d*<sub>6</sub>).

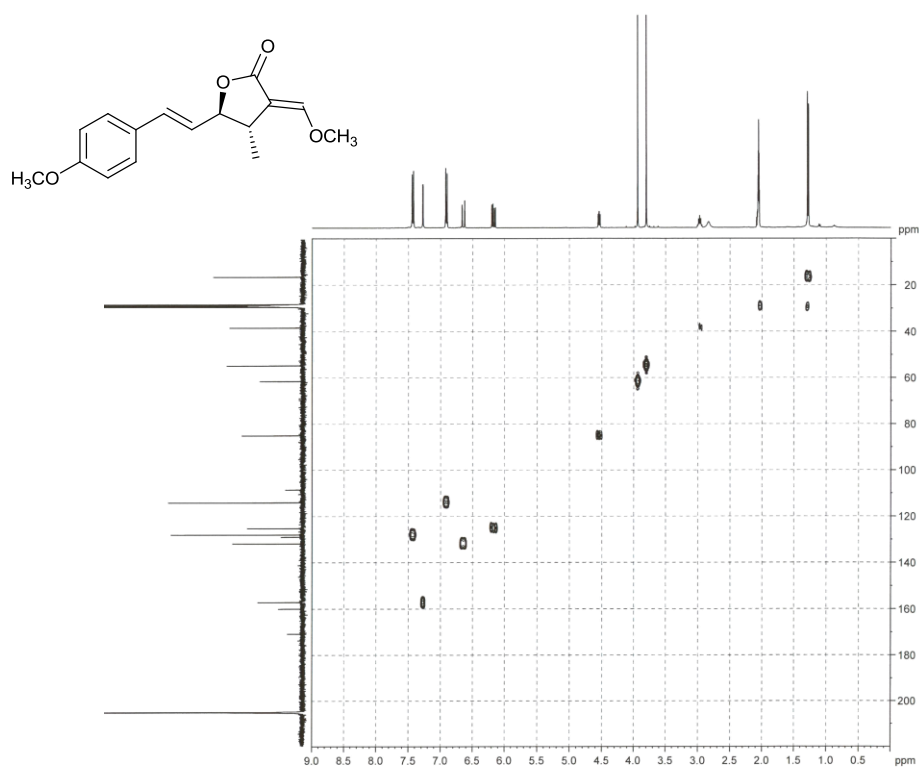

**Figure S33.** HMQC spectrum of compound **7** (400 MHz, acetone- $d_6$ ).

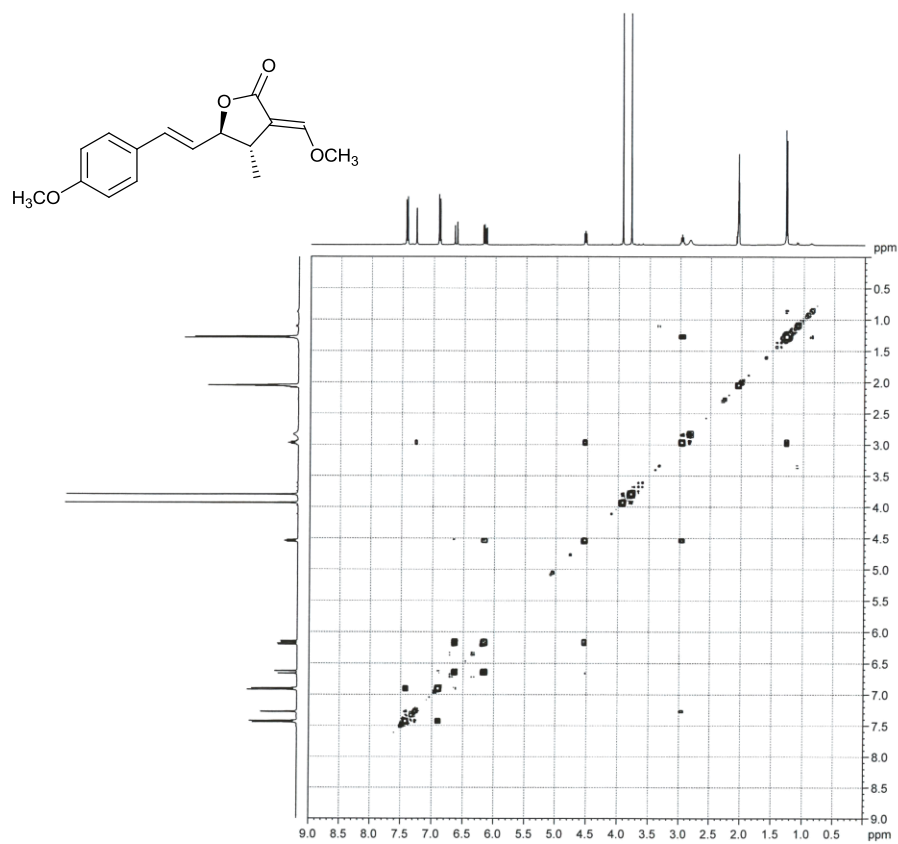

**Figure S34.** COSY spectrum of compound **7** (400 MHz, acetone- $d_6$ ).

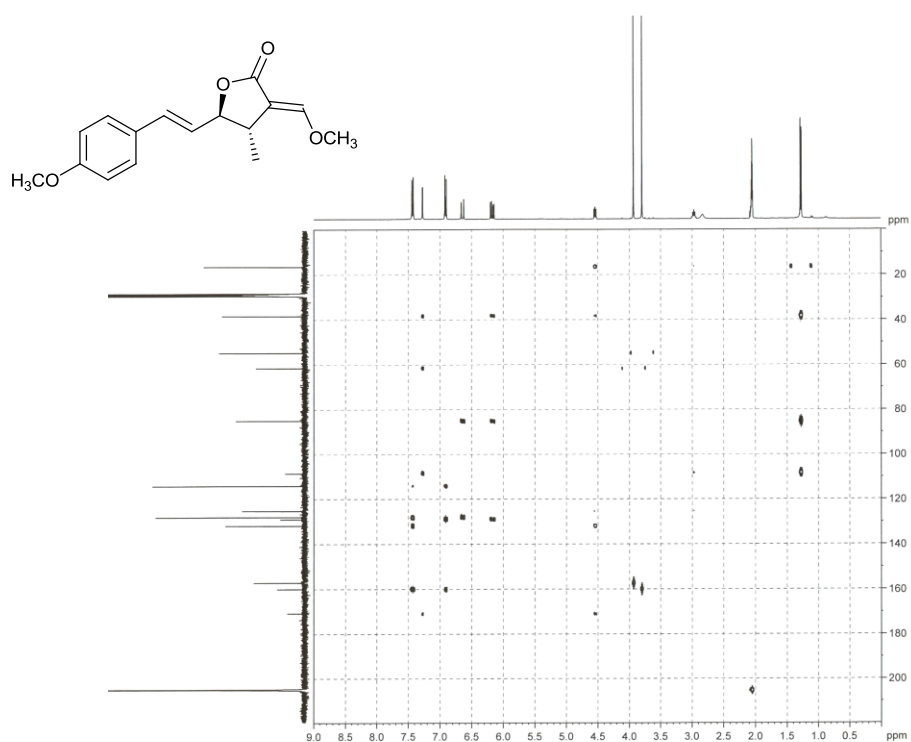

**Figure S35.** HMBC spectrum of compound **7** (400 MHz, acetone- $d_6$ ).

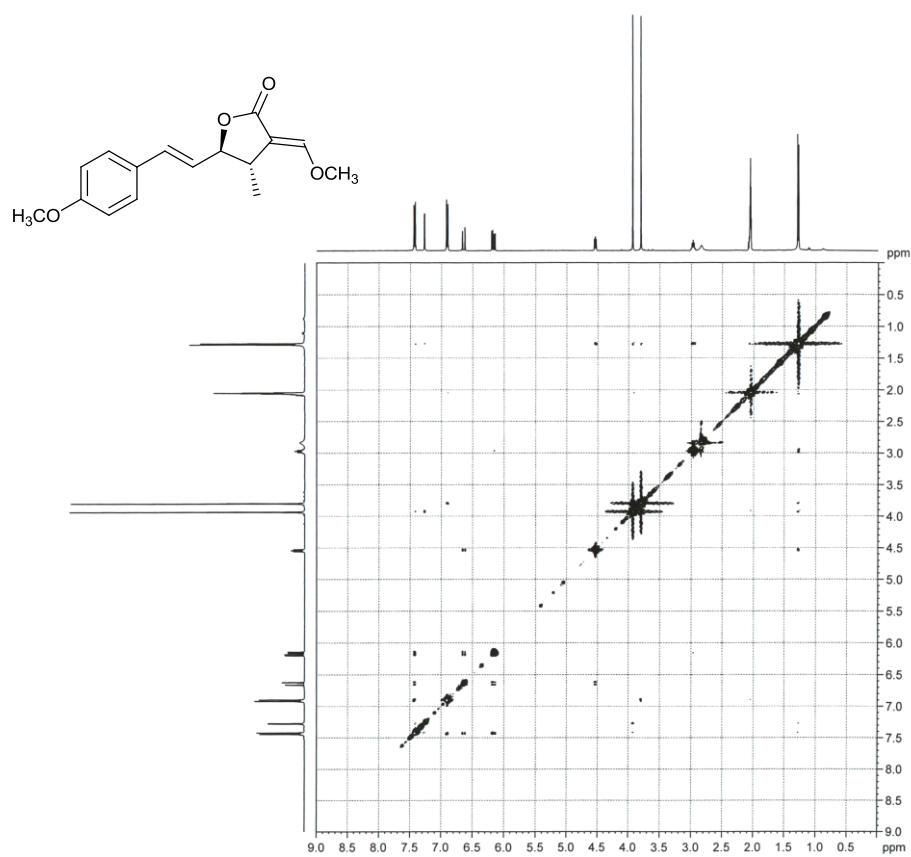

**Figure S36.** NOESY spectrum of compound **7** (400 MHz, acetone- $d_6$ ).

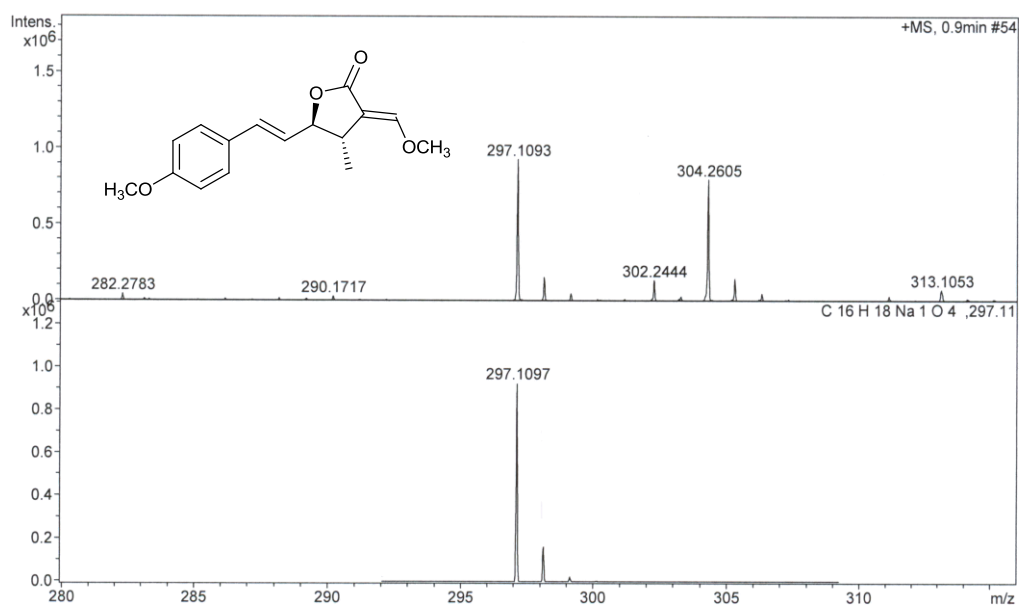

**Figure S37.** HRESIMS of compound **7**.

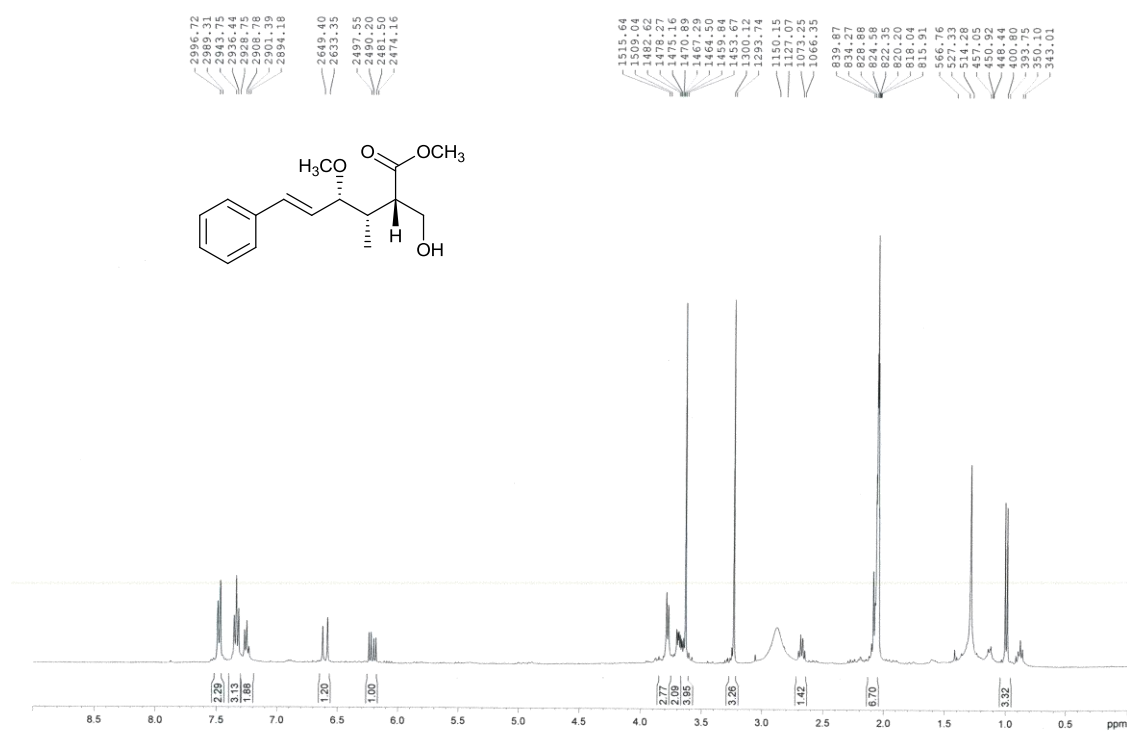

**Figure S38.** <sup>1</sup>H NMR spectrum of compound **8** (400 MHz, acetone-*d*<sub>6</sub>).

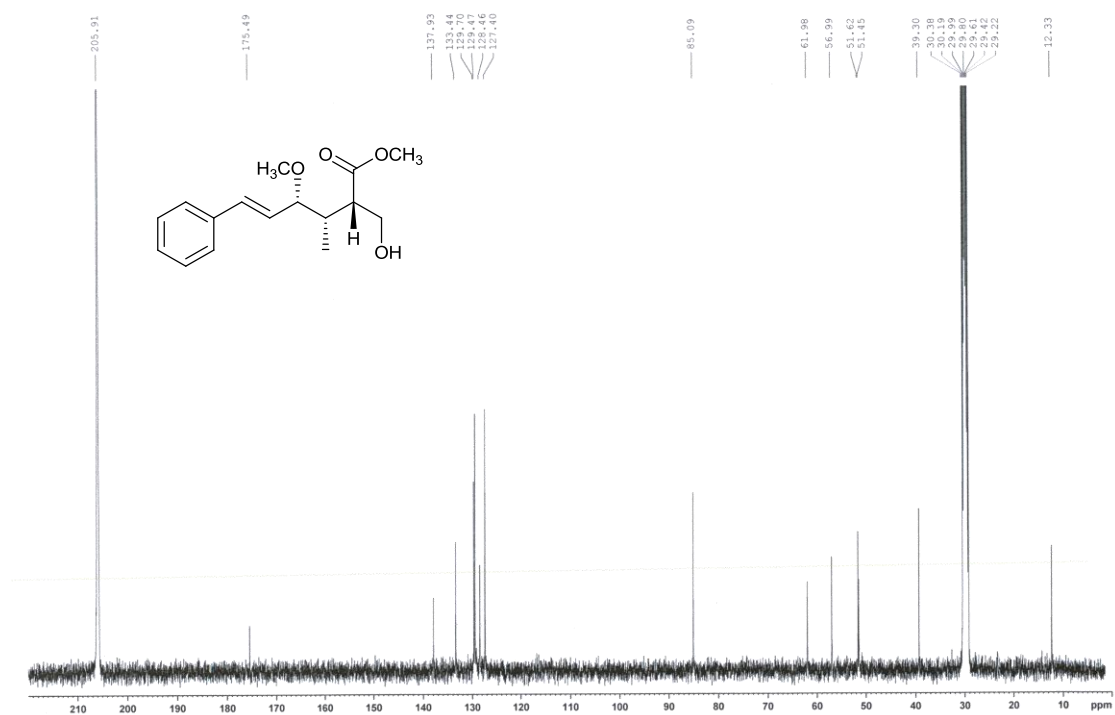

**Figure S39.** <sup>13</sup>C NMR spectrum of compound **8** (100 MHz, acetone-*d*<sub>6</sub>).

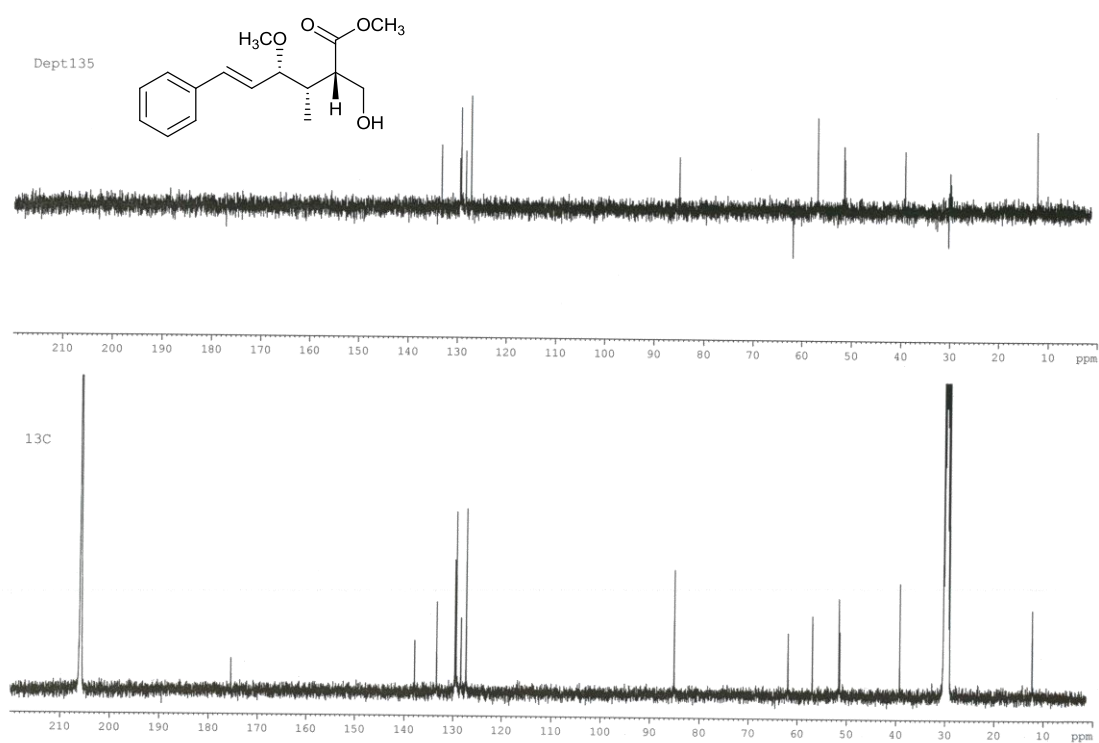

**Figure S40.** <sup>13</sup>C NMR and DEPT-135 spectra of compound **8** (100 MHz, acetone-*d*<sub>6</sub>).

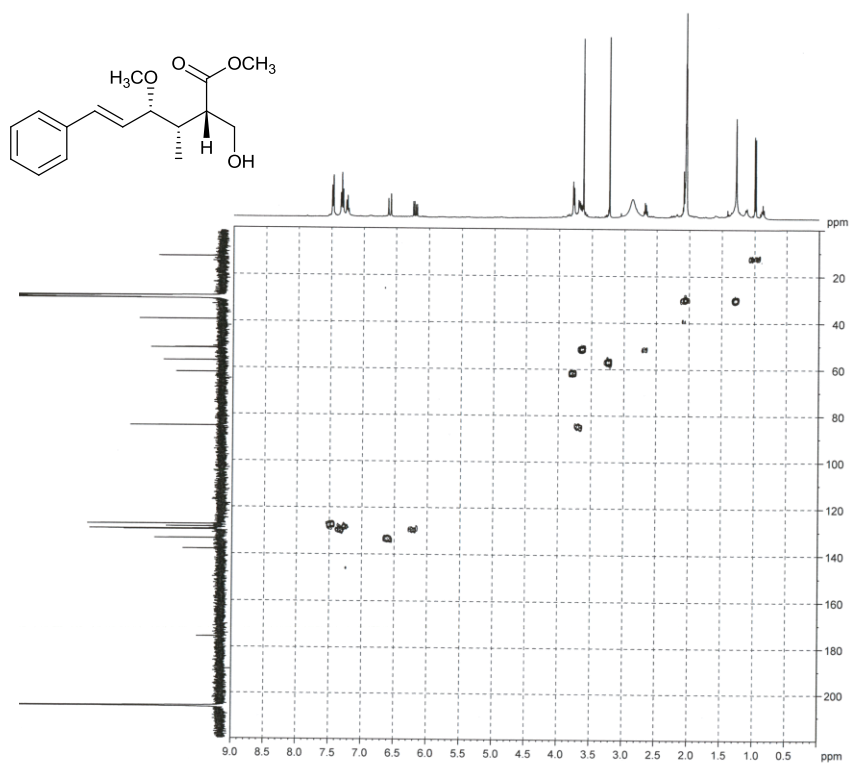

**Figure S41.** HMQC spectrum of compound **8** (400 MHz, acetone- $d_6$ ).

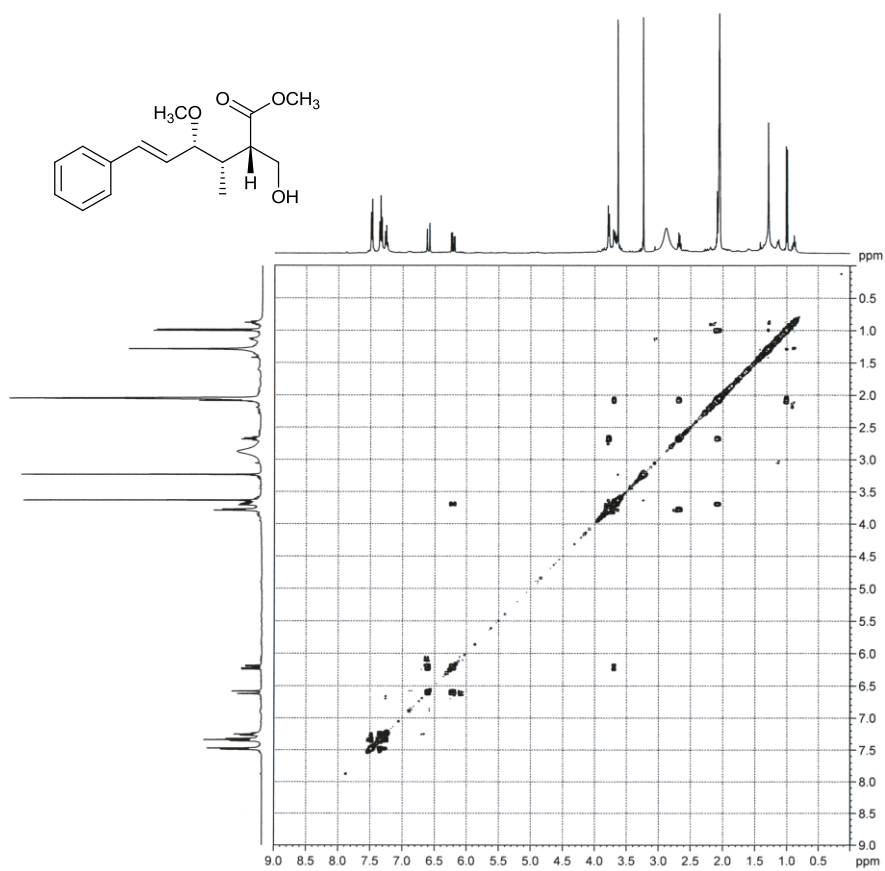

**Figure S42.** COSY spectrum of compound **8** (400 MHz, acetone- $d_6$ ).

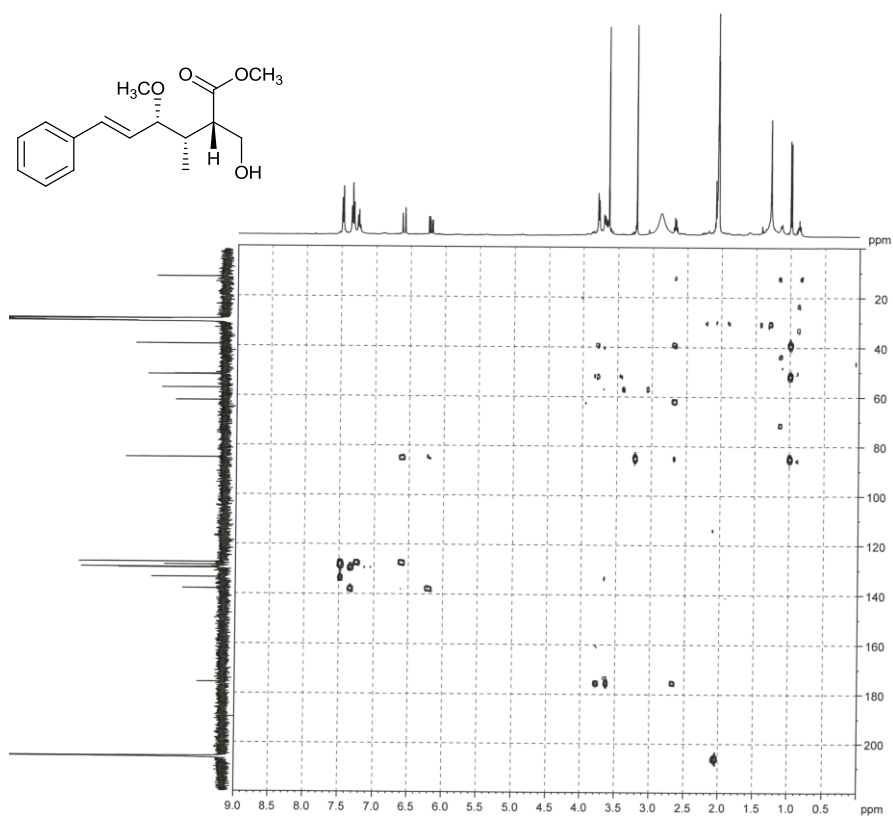

**Figure S43.** HMBC spectrum of compound **8** (400 MHz, acetone- $d_6$ ).

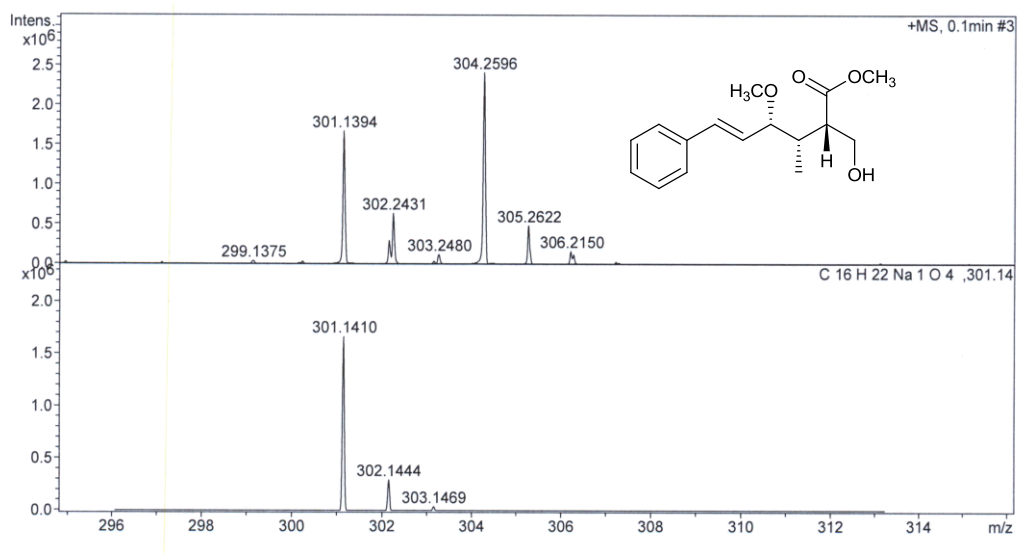

**Figure S44.** HRESIMS of compound **8**.



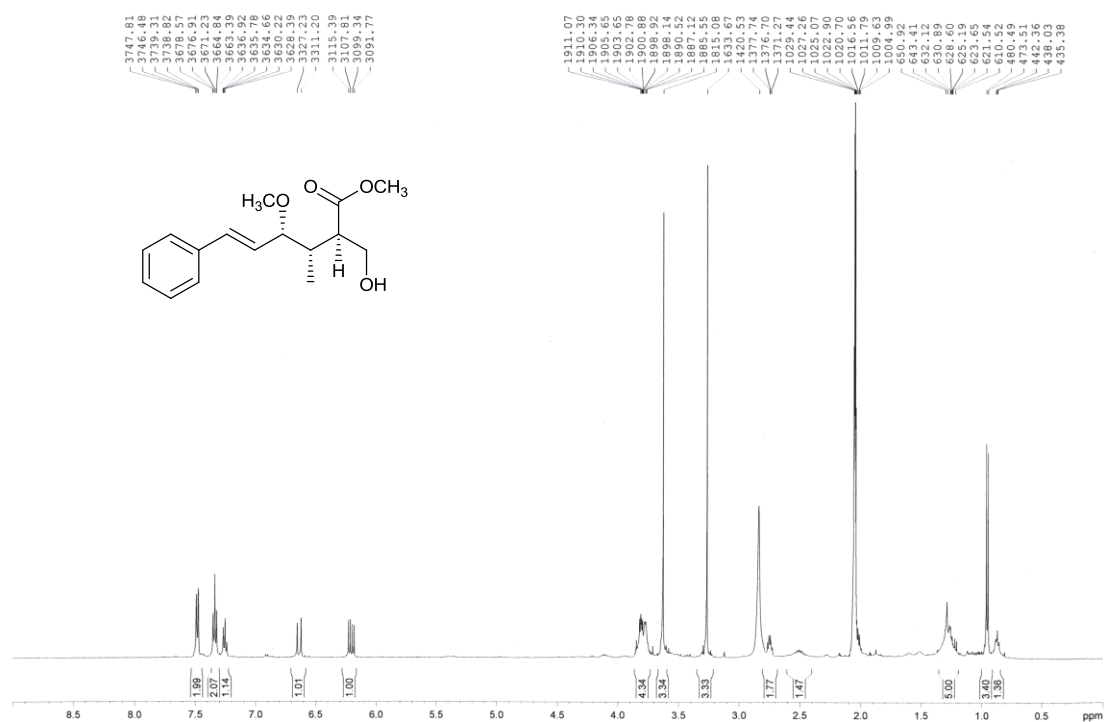

**Figure S45.** <sup>1</sup>H NMR spectrum of compound **9** (500 MHz, acetone-*d*<sub>6</sub>).

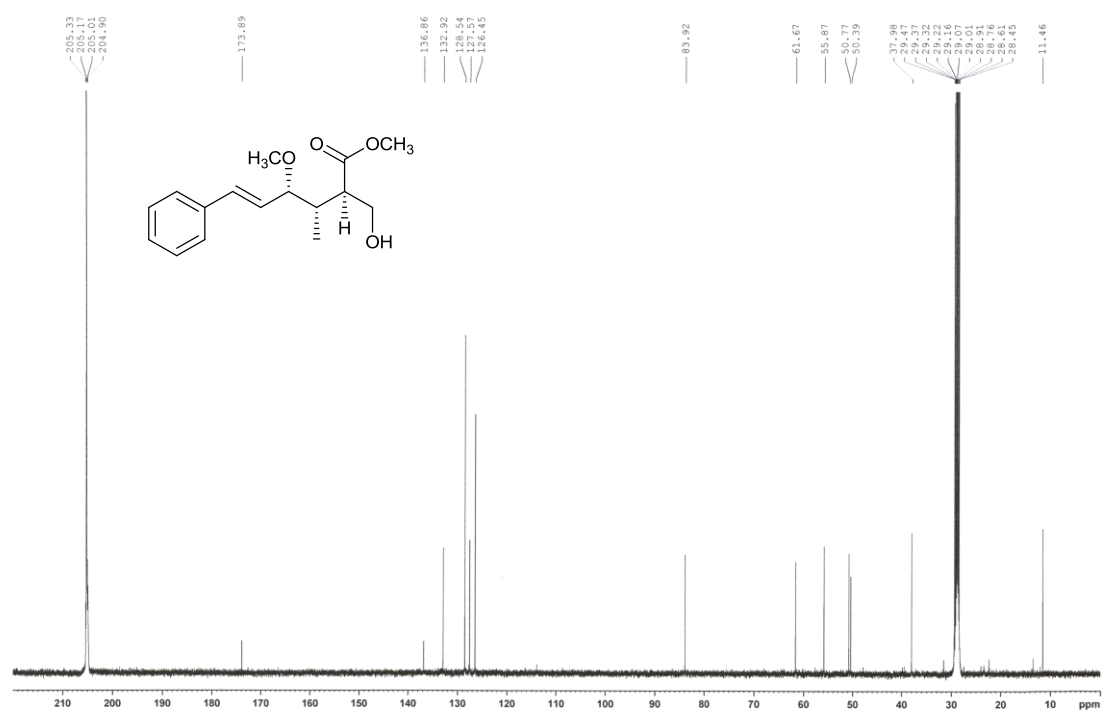

**Figure S46.** <sup>13</sup>C NMR spectrum of compound **9** (125 MHz, acetone-*d*<sub>6</sub>).

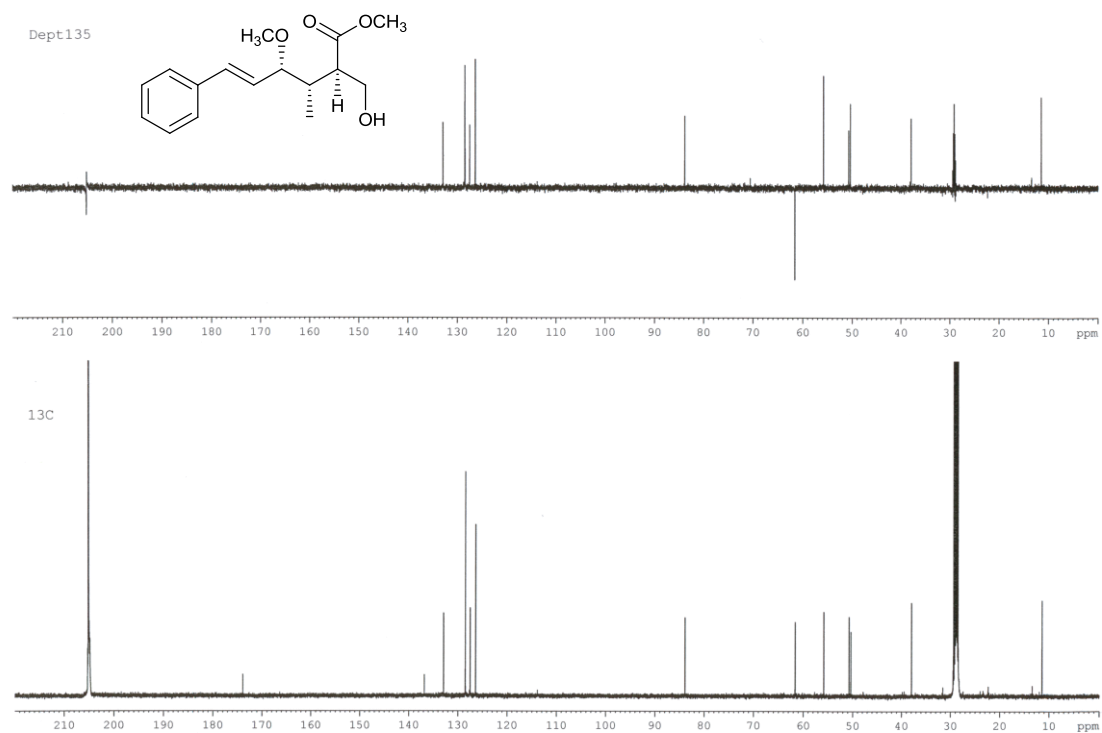

**Figure S47.**  $^{13}\text{C}$  NMR and DEPT-135 spectra of compound **9** (125 MHz, acetone- $d_6$ ).

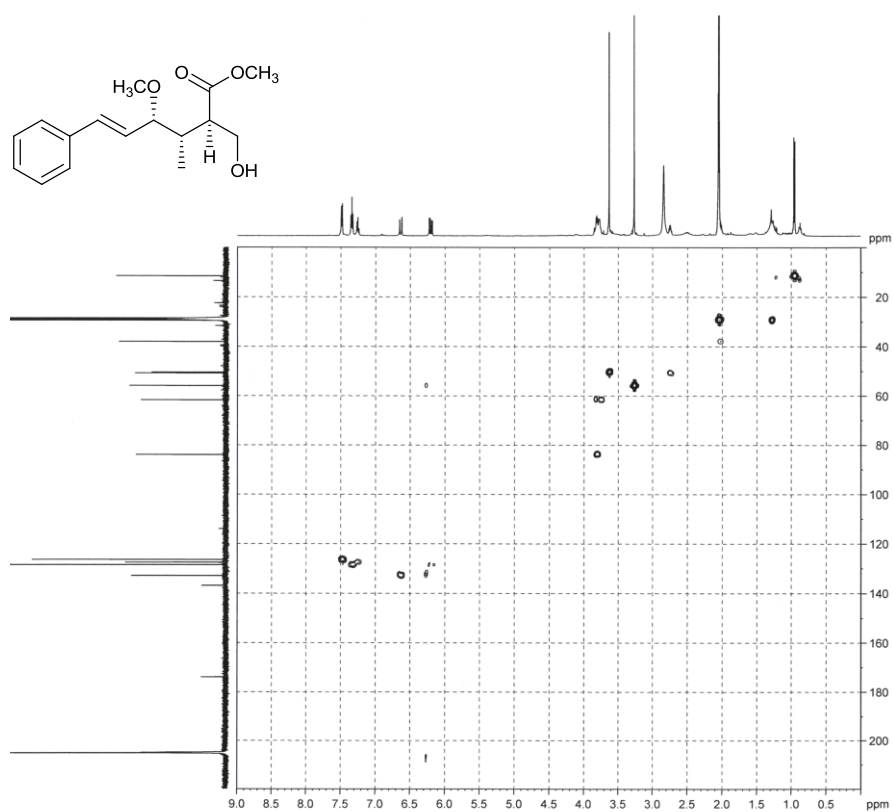

**Figure S48.** HMQC spectrum of compound **9** (500 MHz, acetone- $d_6$ ).

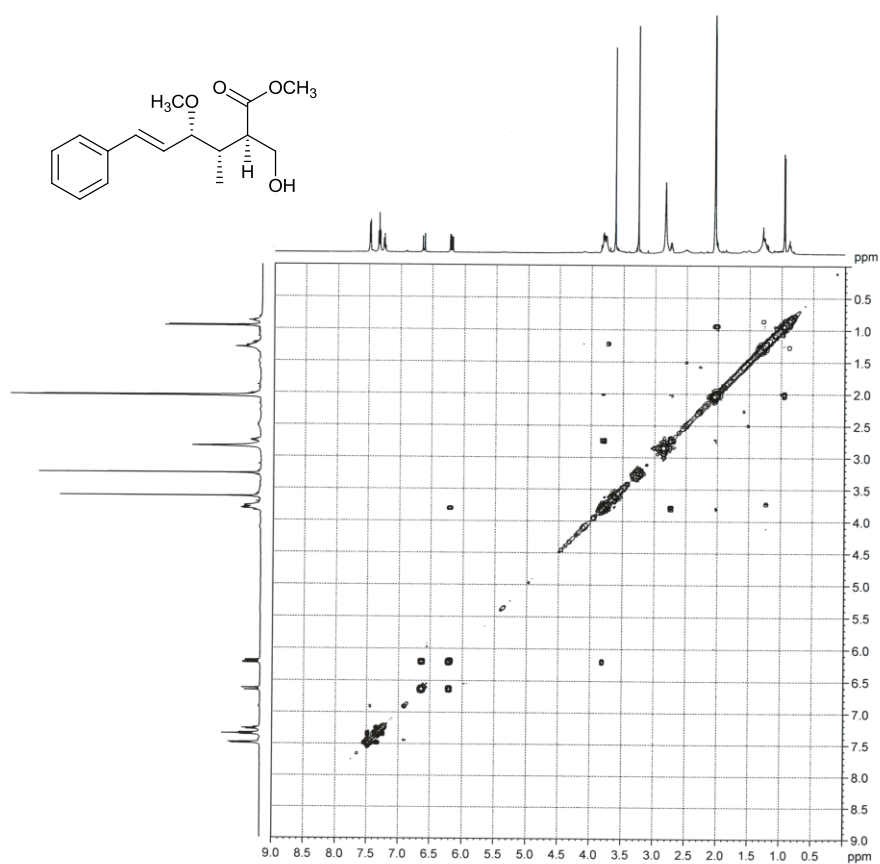

**Figure S49.** COSY spectrum of compound **9** (500 MHz, acetone- $d_6$ ).

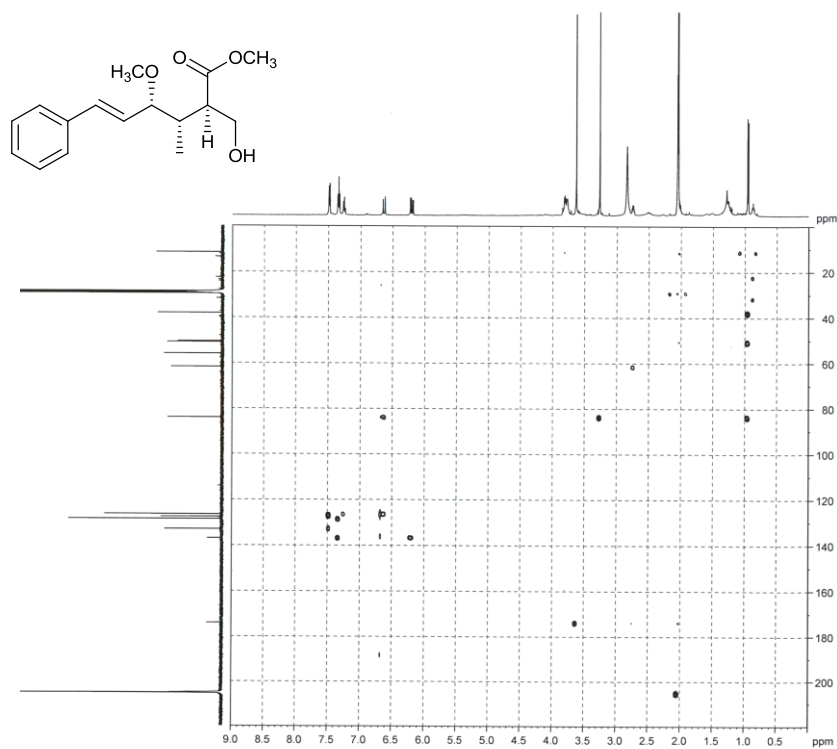

**Figure S50.** HMBC spectrum of compound **9** (500 MHz, acetone- $d_6$ ).

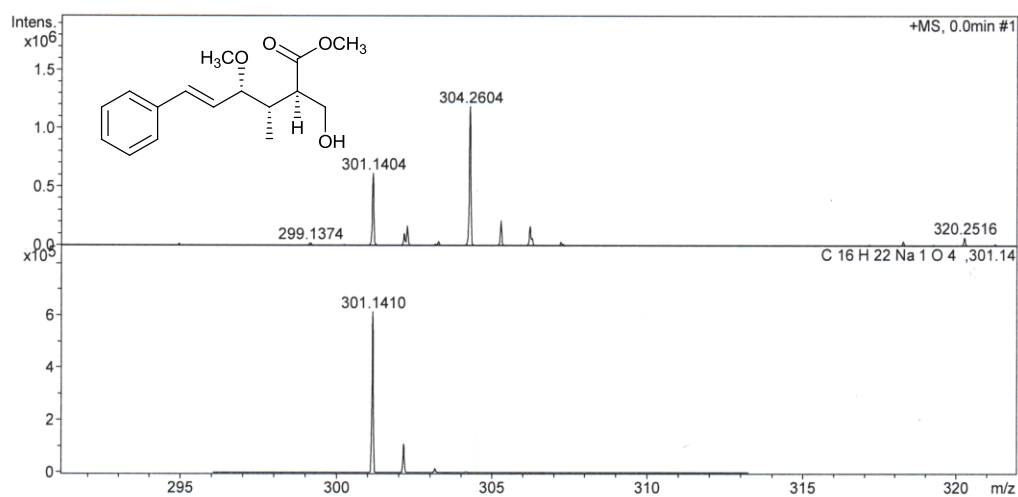

**Figure S51.** HRESIMS of compound **9**.

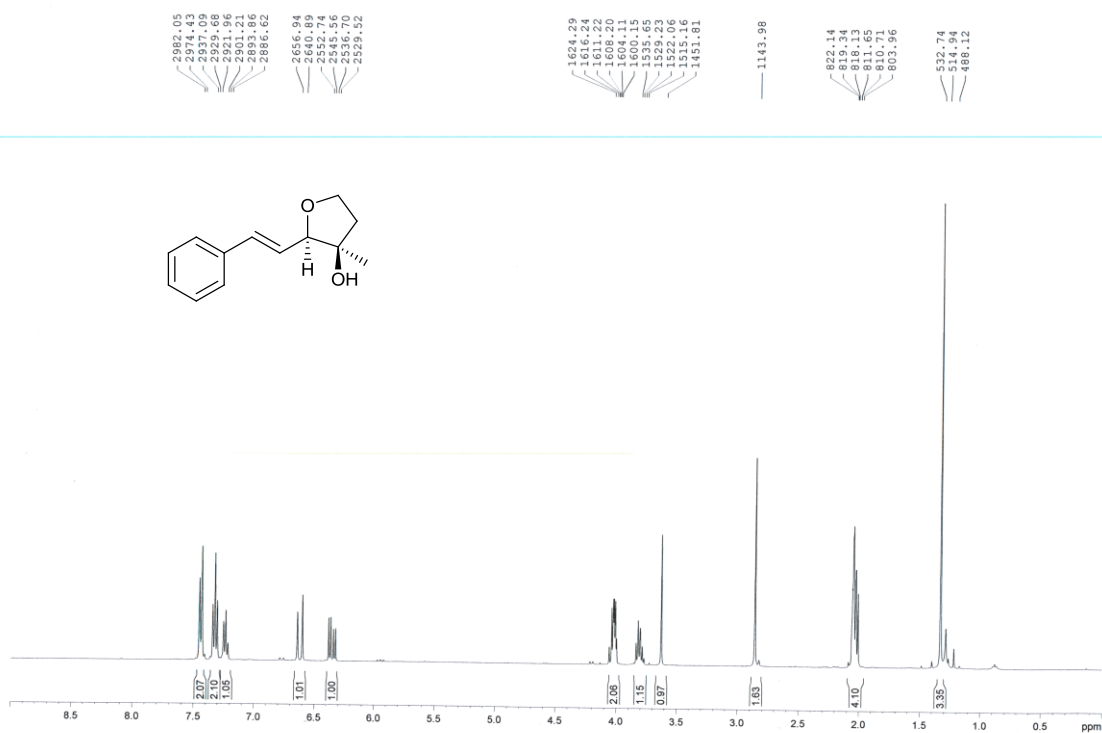

**Figure S52.** <sup>1</sup>H NMR spectrum of compound **10** (400 MHz, acetone-*d*<sub>6</sub>).

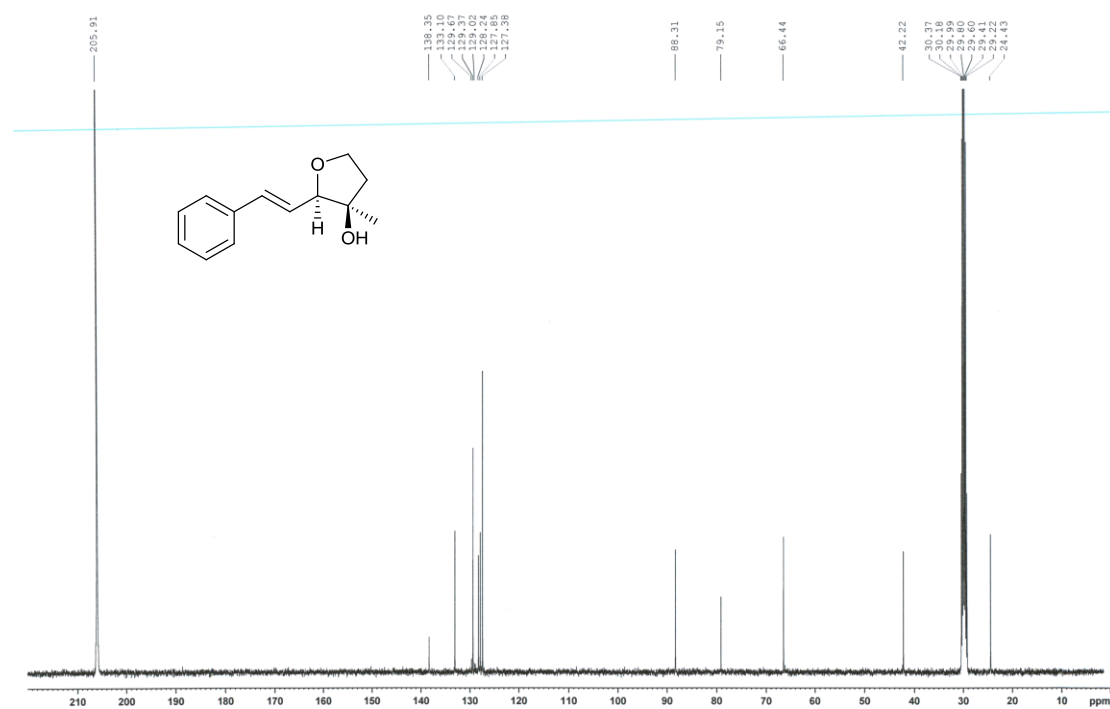

**Figure S53.**  $^{13}\text{C}$  NMR spectrum of compound **10** (100 MHz, acetone- $d_6$ ).

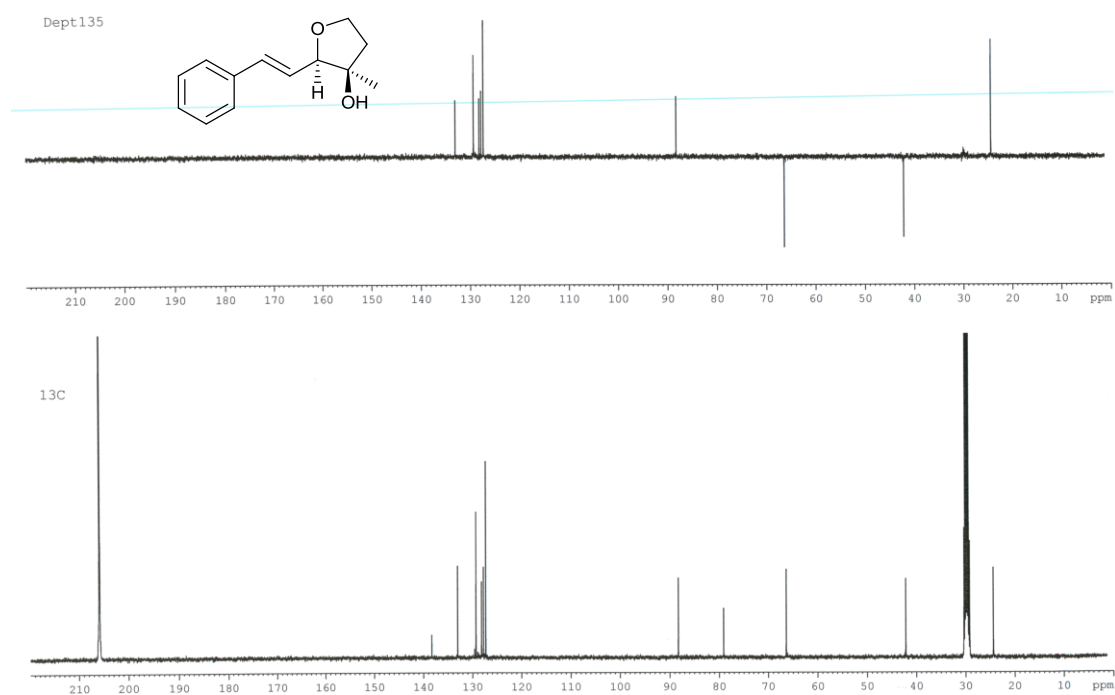

**Figure S54.**  $^{13}\text{C}$  NMR and DEPT-135 spectra of compound **10** (100 MHz, acetone- $d_6$ ).

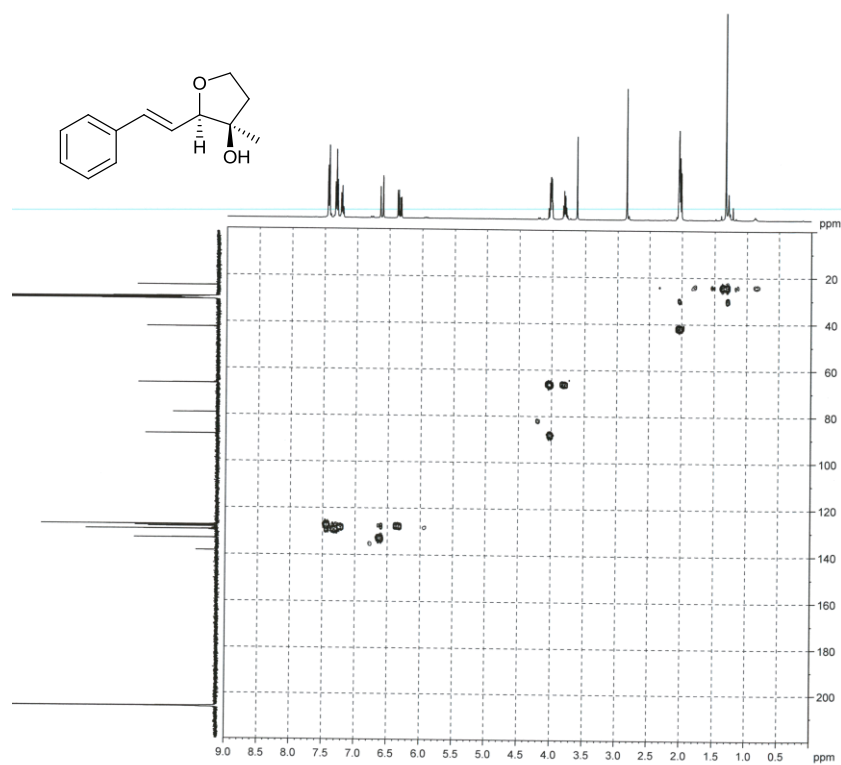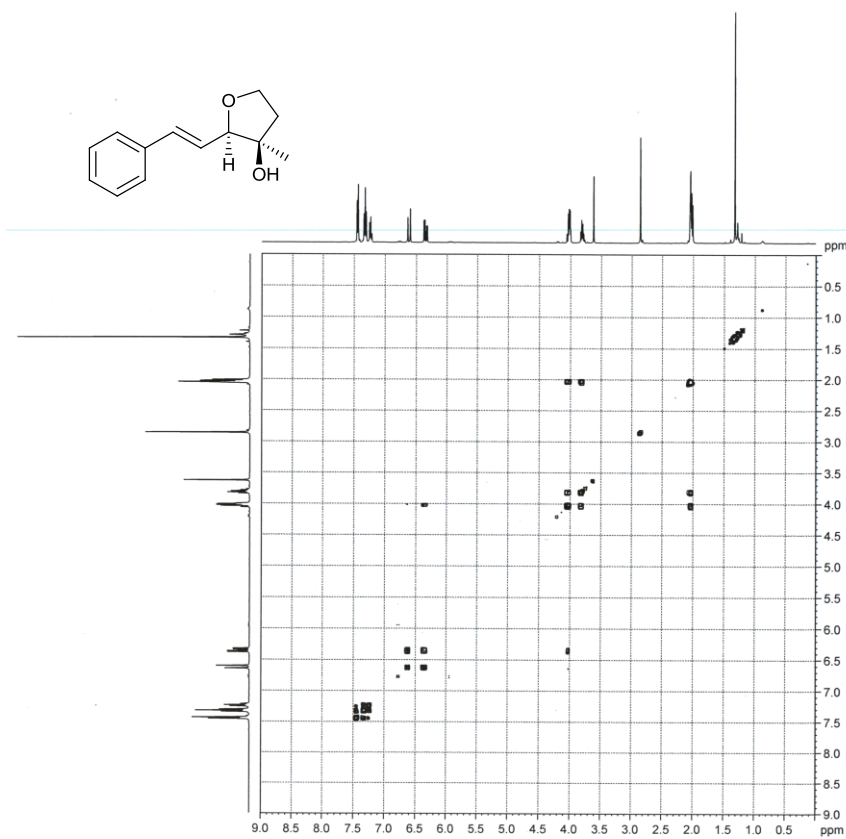

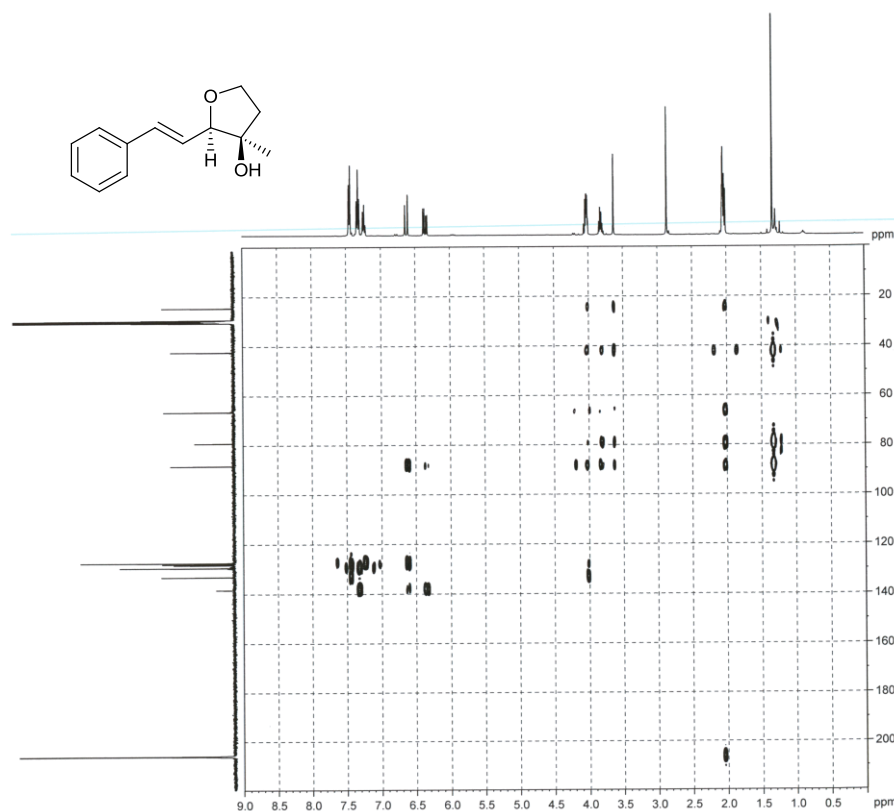

**Figure S57.** HMBC spectrum of compound **10** (400 MHz, acetone- $d_6$ ).

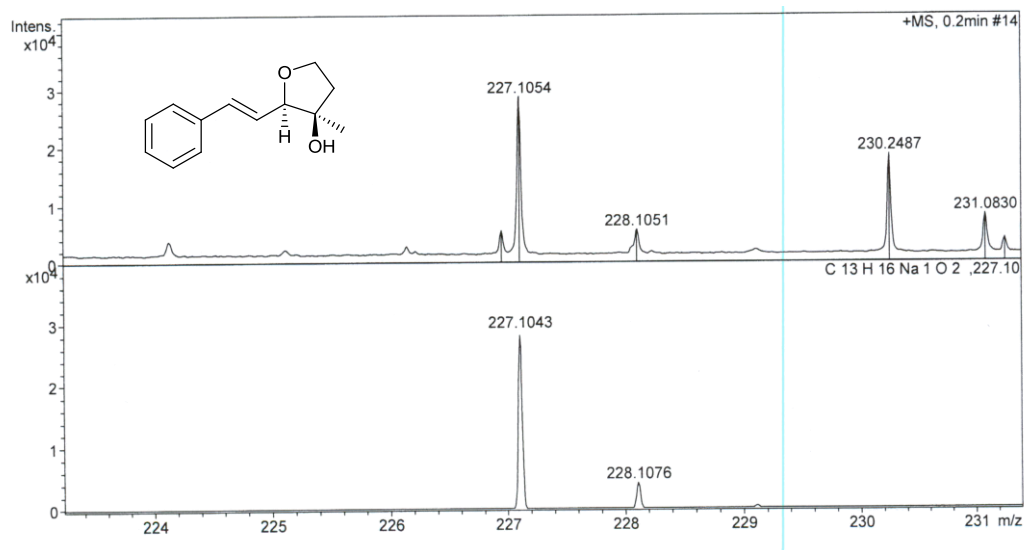

**Figure S58.** HRESIMS of compound **10**.





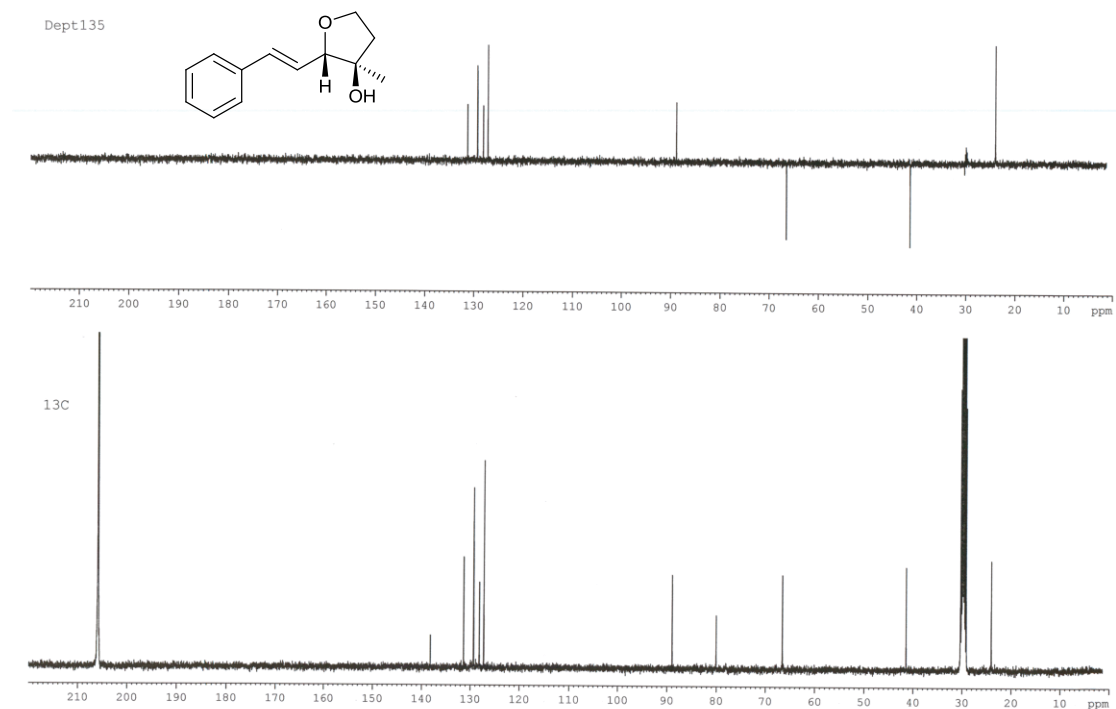

**Figure S61.** <sup>13</sup>C NMR and DEPT-135 spectra of compound **11** (100 MHz, acetone-*d*<sub>6</sub>).

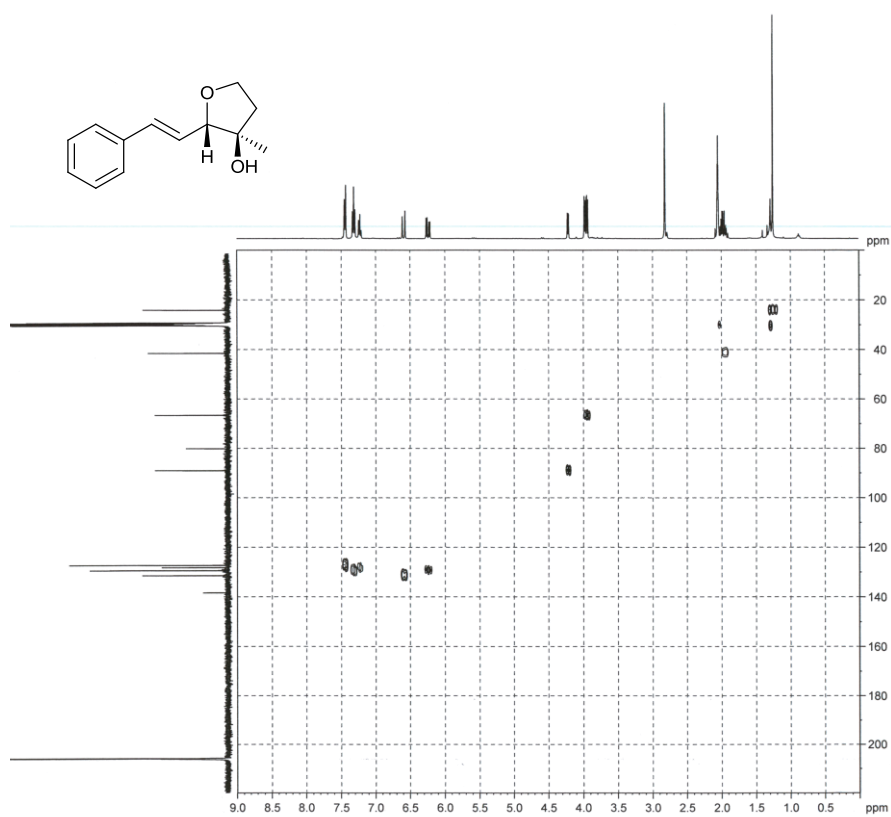

**Figure S62.** HMQC spectrum of compound **11** (400 MHz, acetone-*d*<sub>6</sub>).

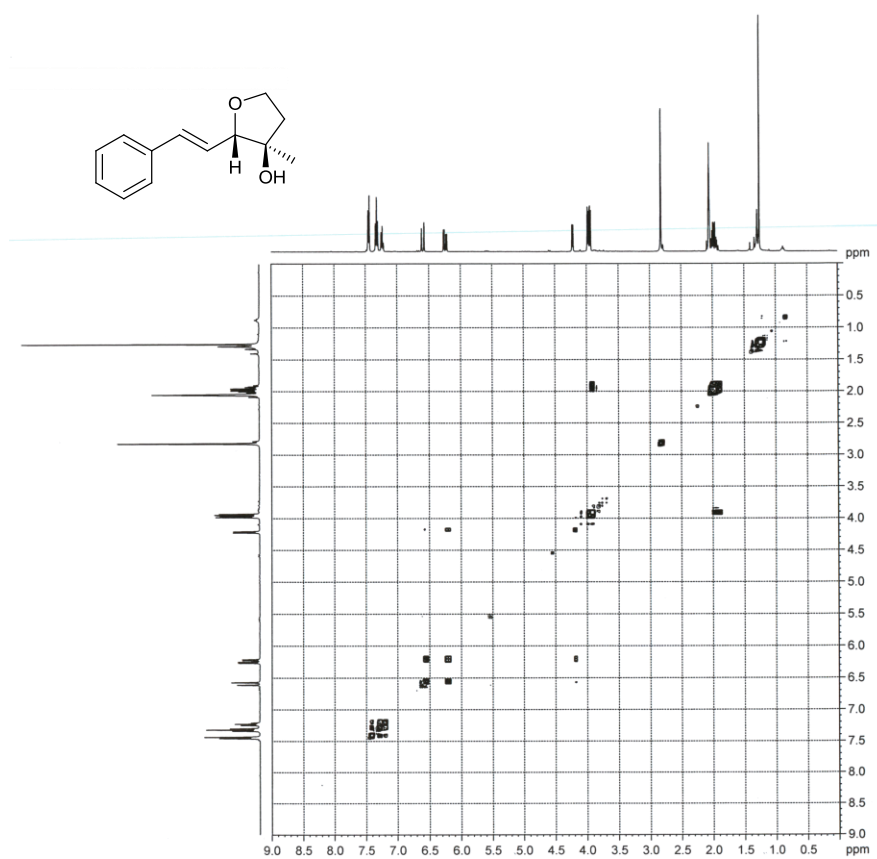

**Figure S63.** COSY spectrum of compound **11** (400 MHz, acetone- $d_6$ ).

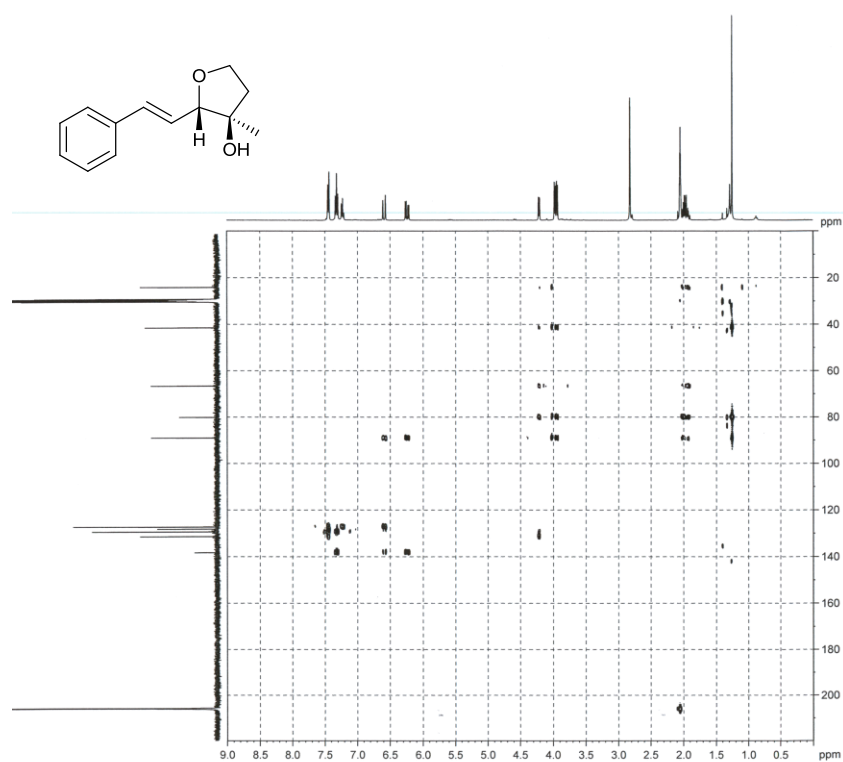

**Figure S64.** HMBC spectrum of compound **11** (400 MHz, acetone- $d_6$ ).

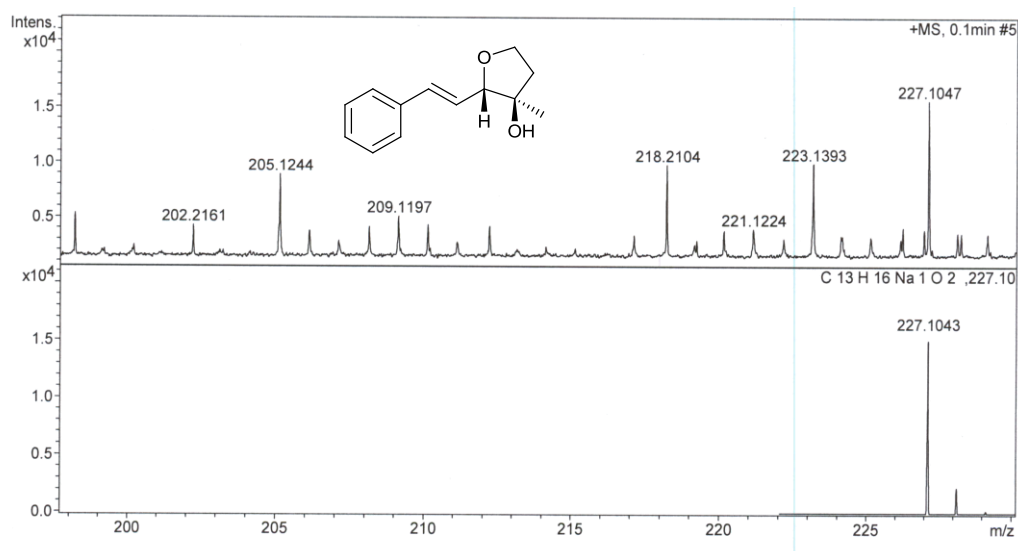

**Figure S65.** HRESIMS of compound **11**.

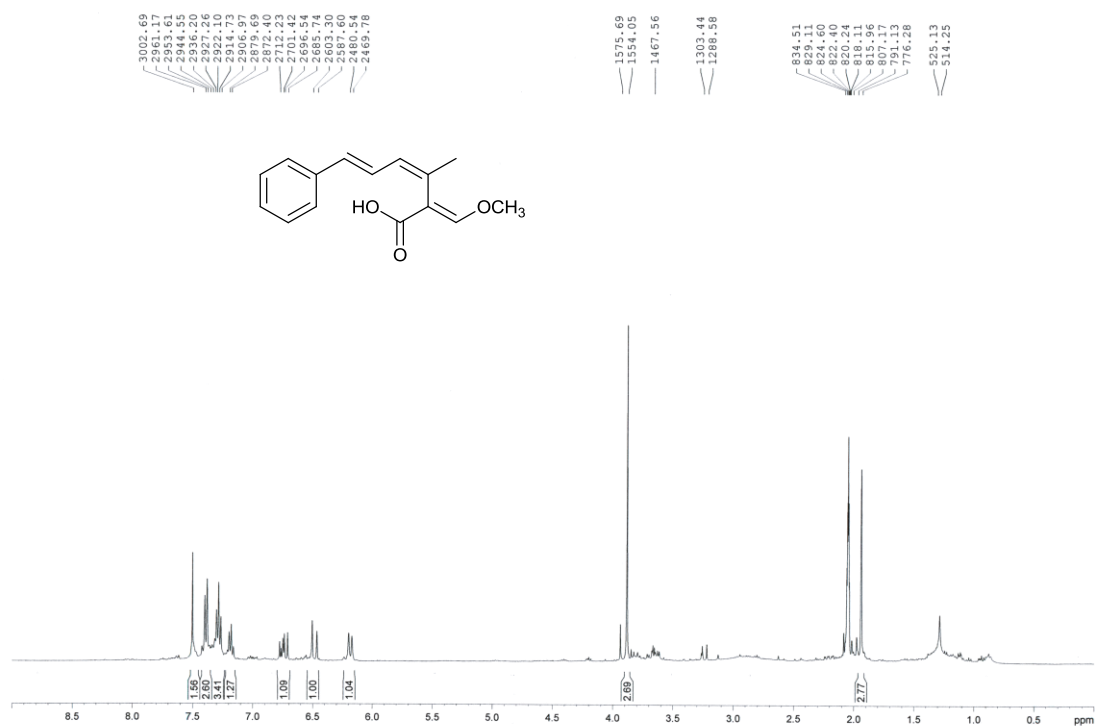

**Figure S66.** <sup>1</sup>H NMR spectrum of compound **12** (400 MHz, acetone-*d*<sub>6</sub>).

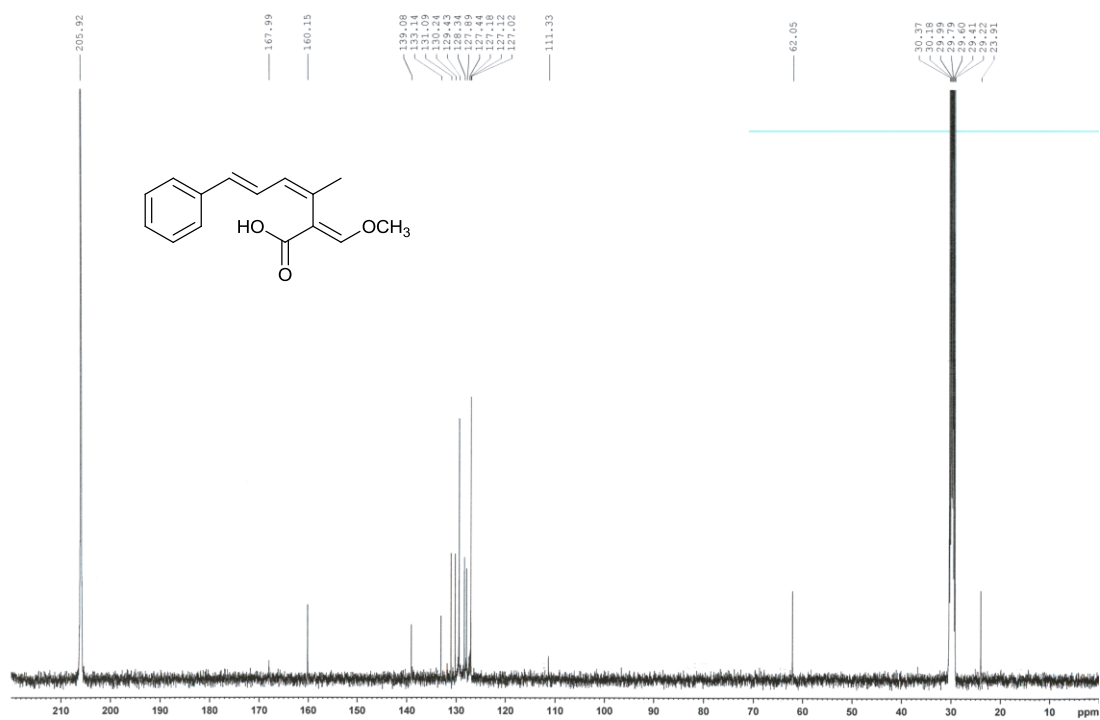

**Figure S67.** <sup>13</sup>C NMR spectrum of compound **12** (100 MHz, acetone-*d*<sub>6</sub>).

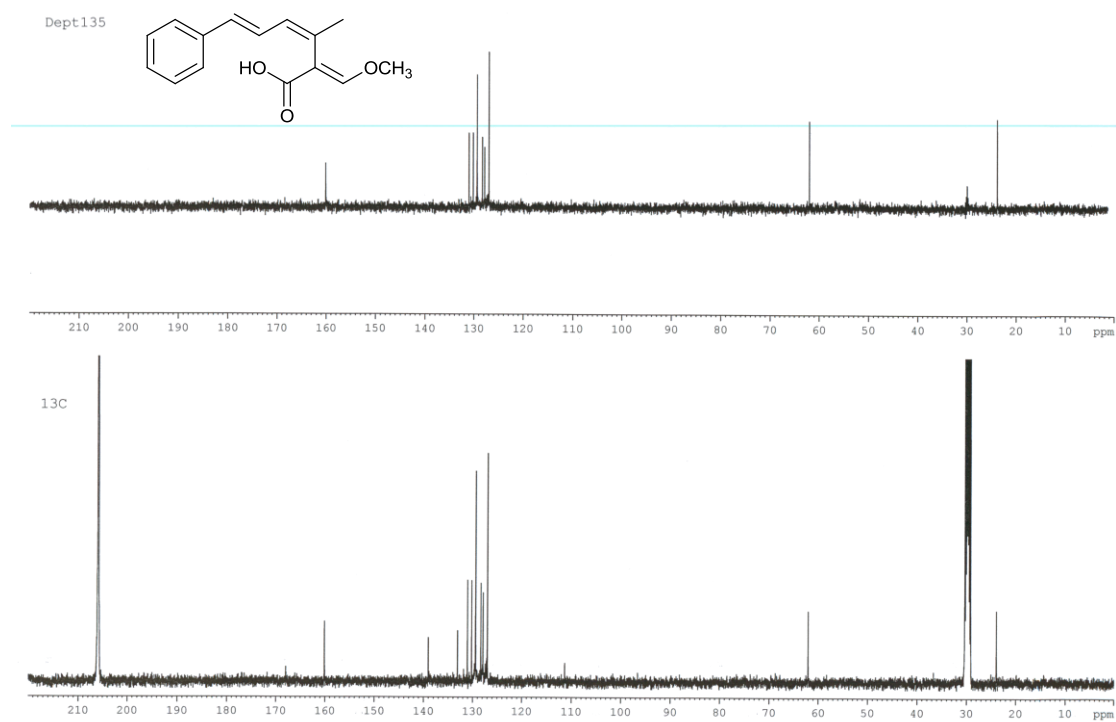

**Figure S68.** <sup>13</sup>C NMR and DEPT-135 spectra of compound **12** (100 MHz, acetone-*d*<sub>6</sub>).

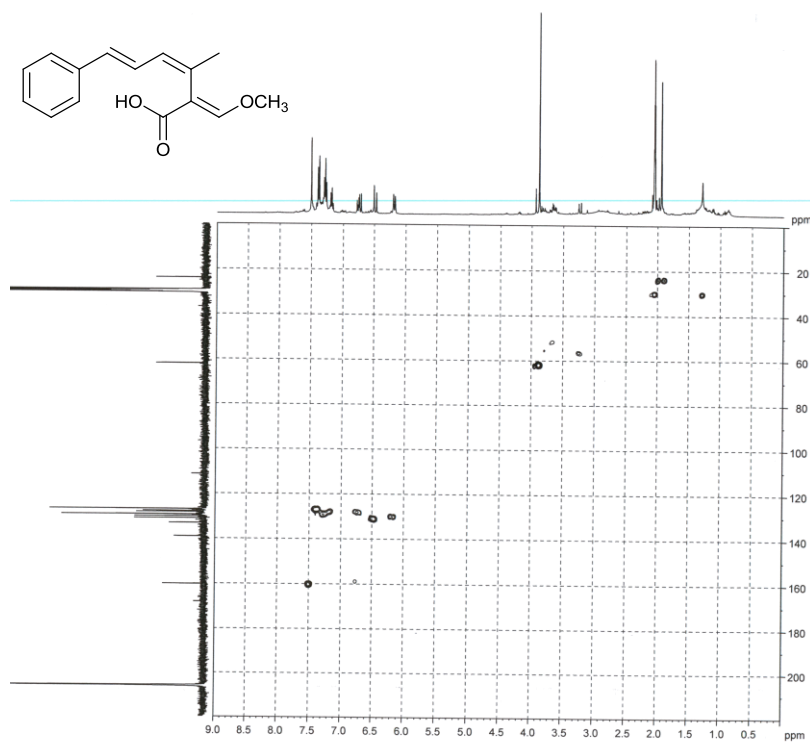

**Figure S69.** HMQC spectrum of compound **12** (400 MHz, acetone- $d_6$ ).

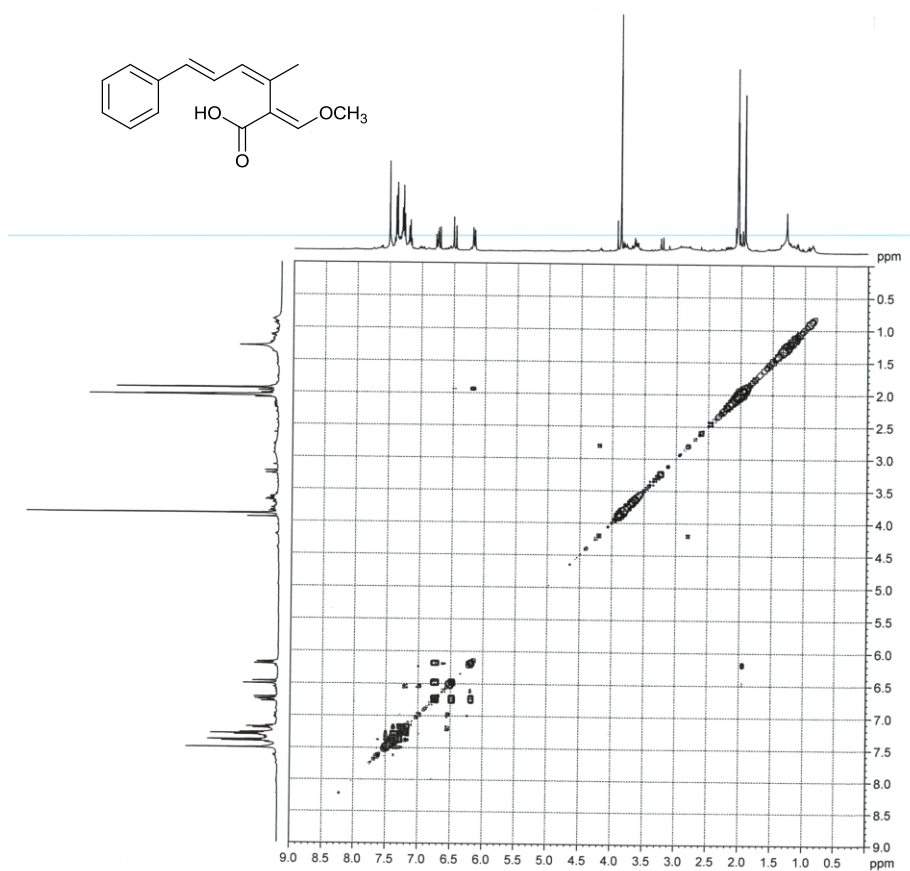

**Figure S70.** COSY spectrum of compound **12** (400 MHz, acetone- $d_6$ ).

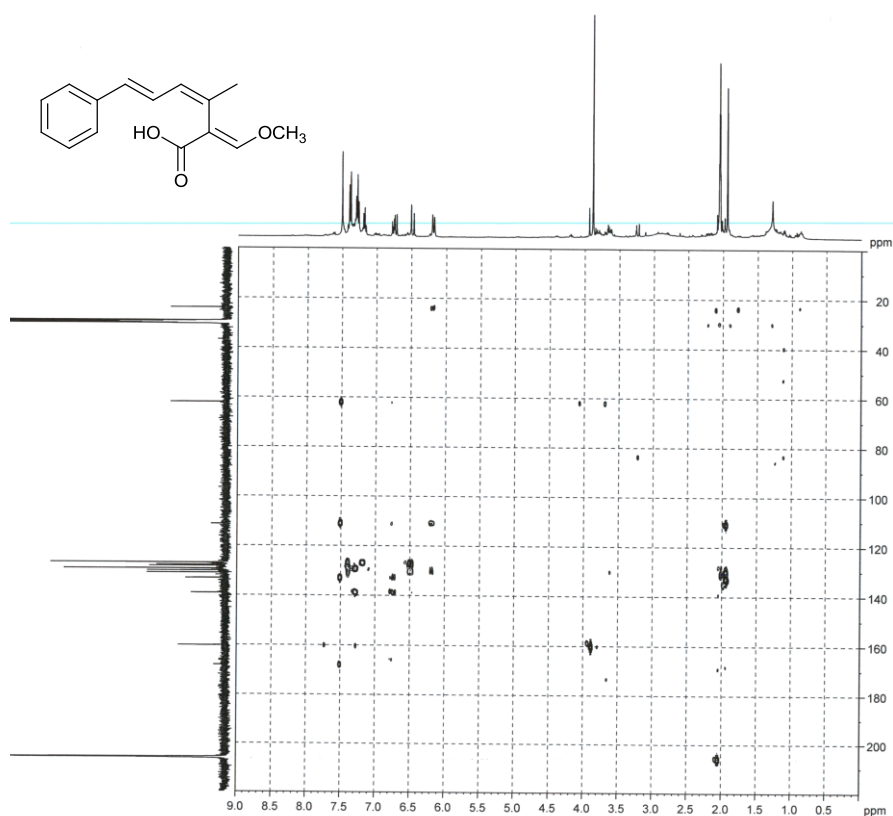

**Figure S71.** HMBC spectrum of compound **12** (400 MHz, acetone- $d_6$ ).

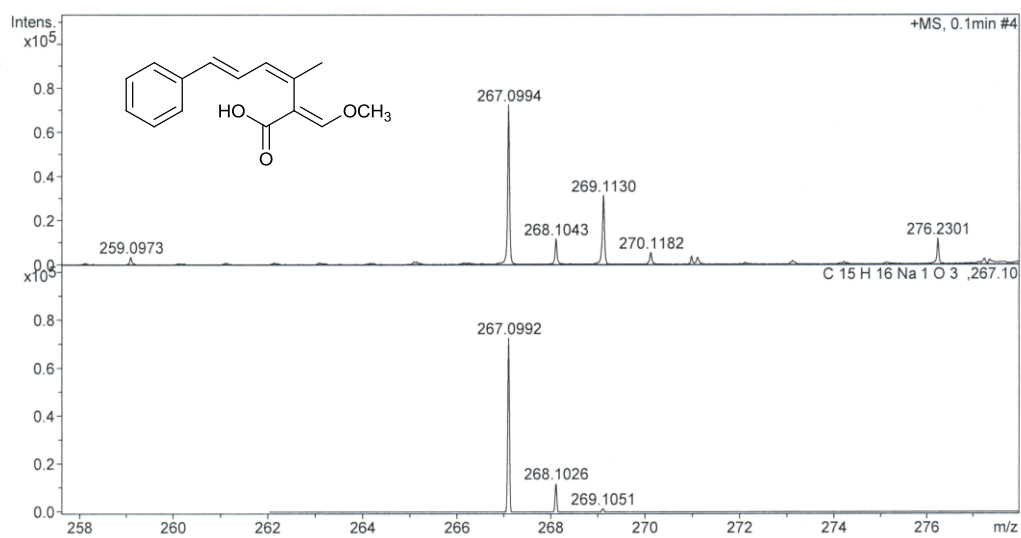

**Figure S72.** HRESIMS of compound **12**.



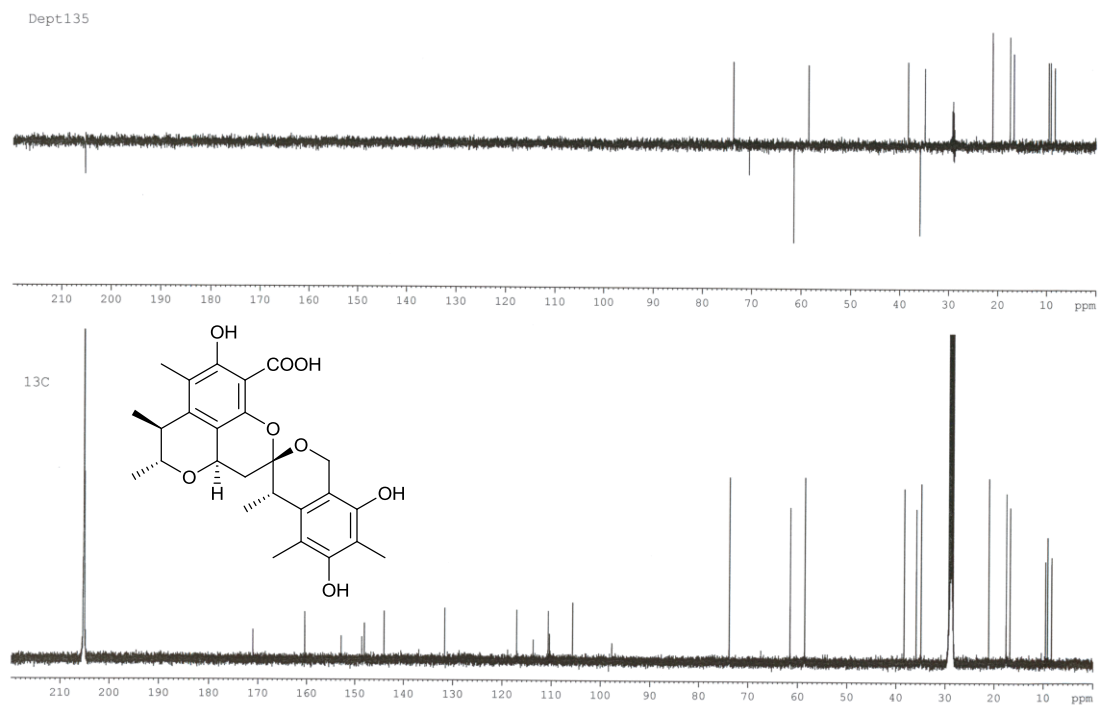

**Figure S75.**  $^{13}\text{C}$  NMR and DEPT-135 spectra of compound **14** (125 MHz, acetone- $d_6$ ).

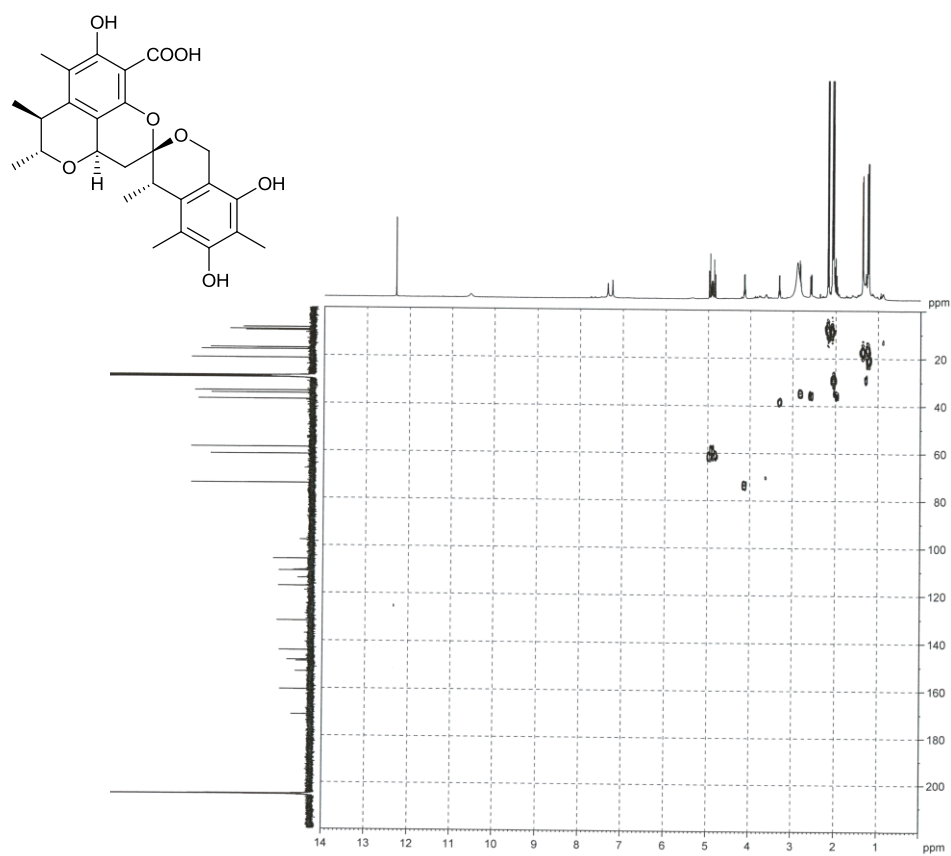

**Figure S76.** HMQC spectrum of compound **14** (500 MHz, acetone- $d_6$ ).



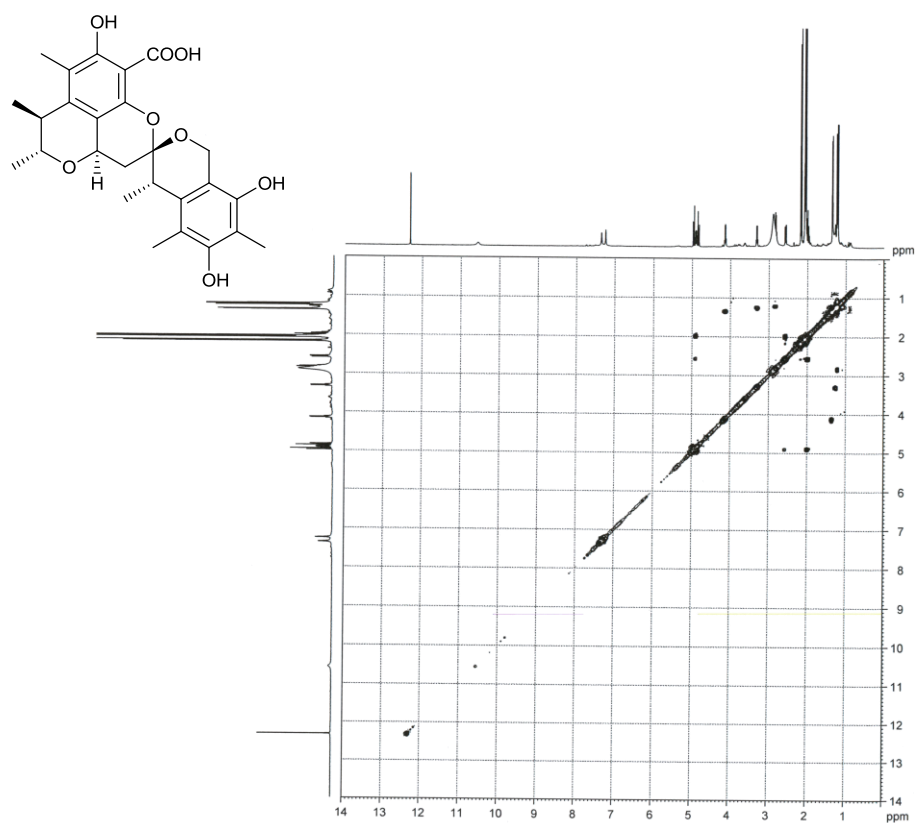

**Figure S77.** COSY spectrum of compound **14** (500 MHz, acetone- $d_6$ ).

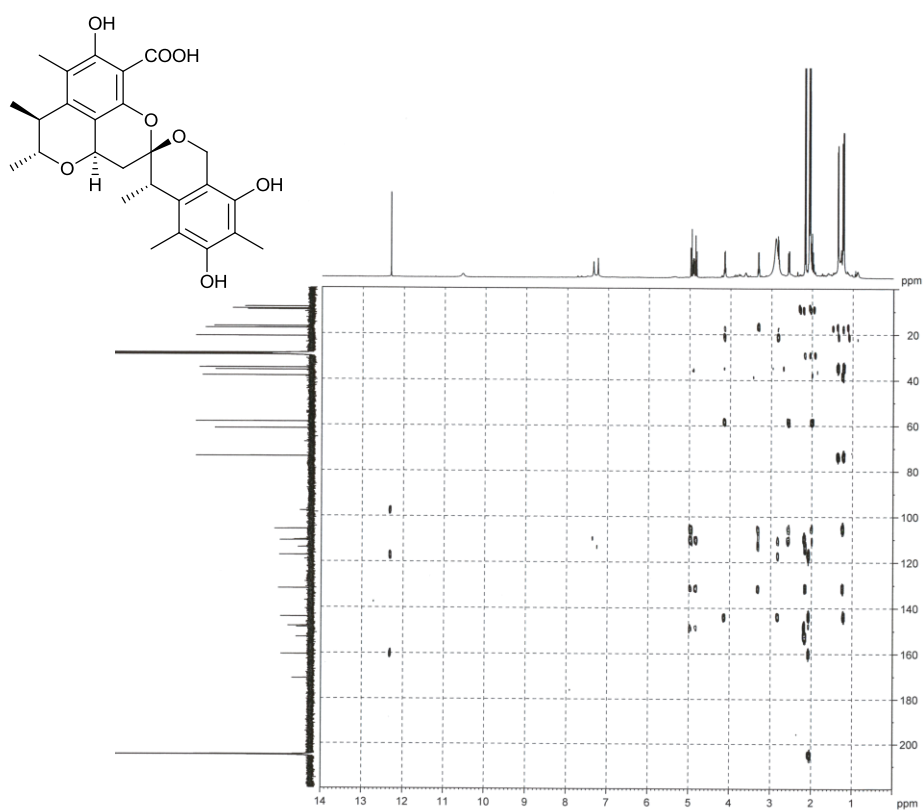

**Figure S78.** HMBC spectrum of compound **14** (500 MHz, acetone- $d_6$ ).

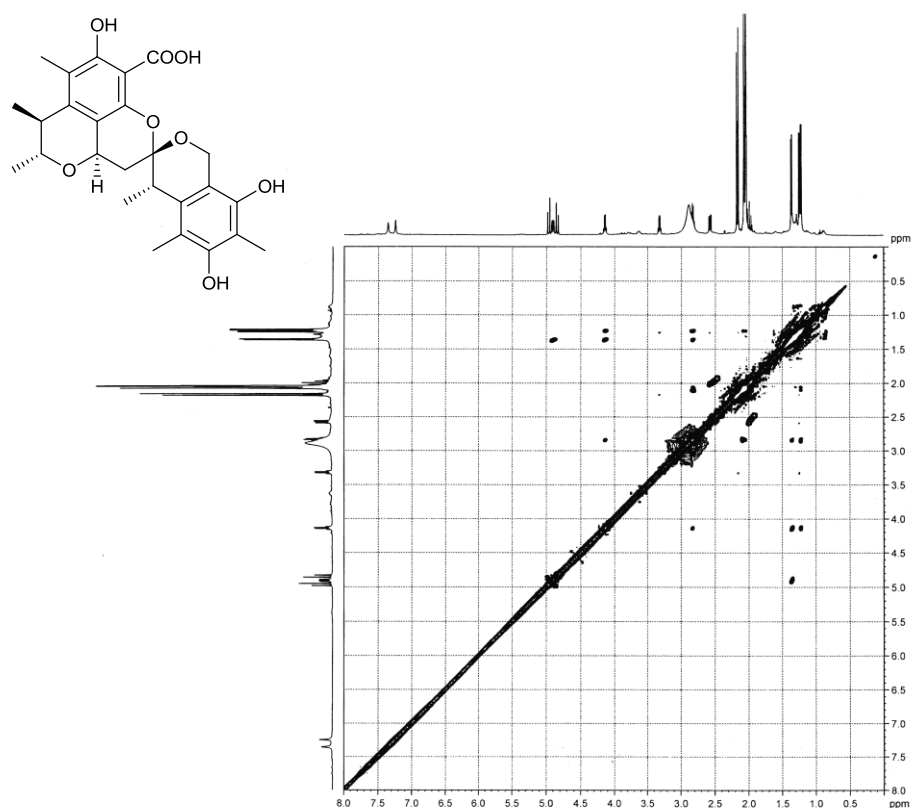

**Figure S79.** NOESY spectrum of compound **14** (500 MHz, acetone- $d_6$ ).

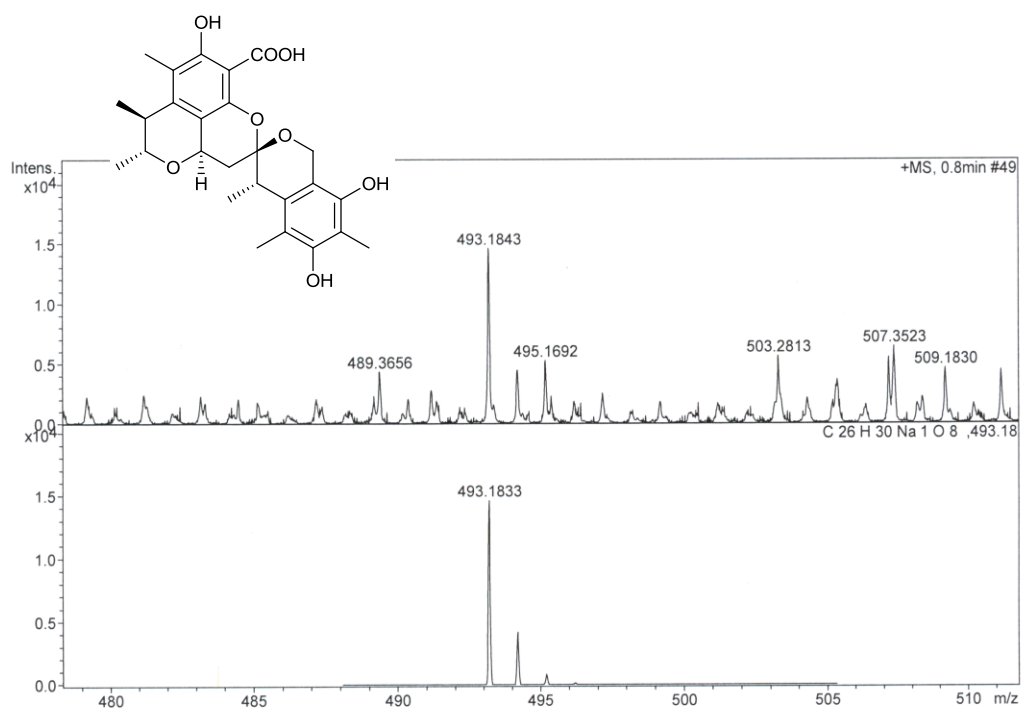

**Figure S80.** HRESIMS of compound **14**.



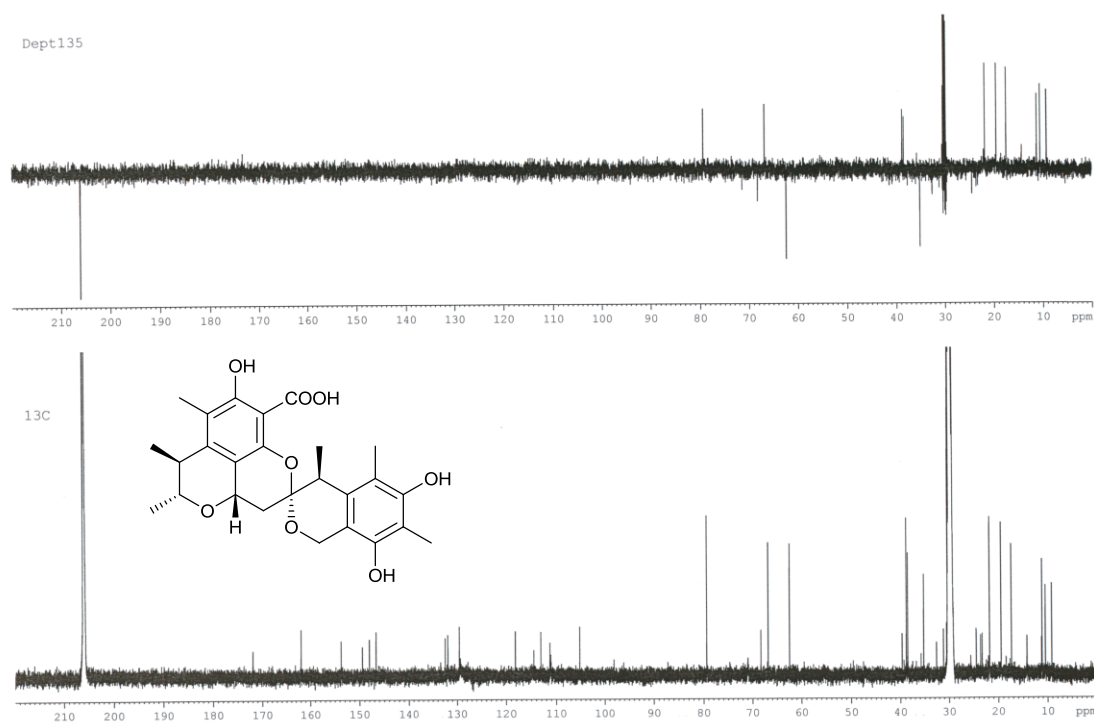

**Figure S83.**  $^{13}\text{C}$  NMR and DEPT-135 spectra of compound **15** (125 MHz, acetone- $d_6$ ).

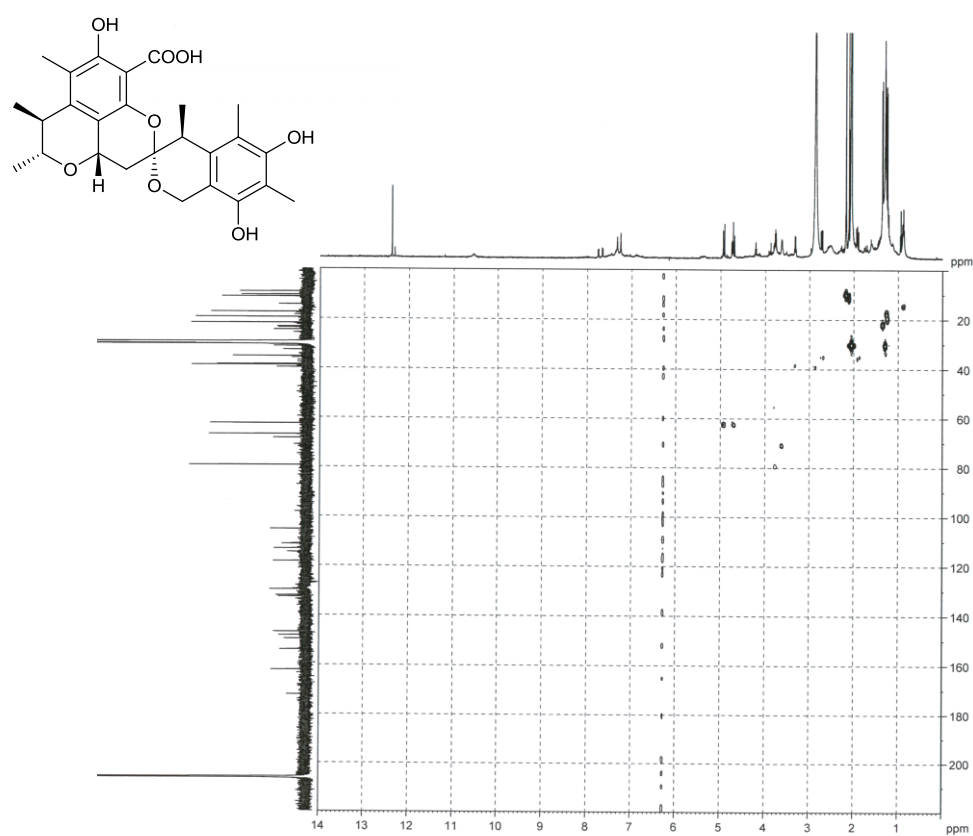

**Figure S84.** HMQC spectrum of compound **15** (500 MHz, acetone- $d_6$ ).

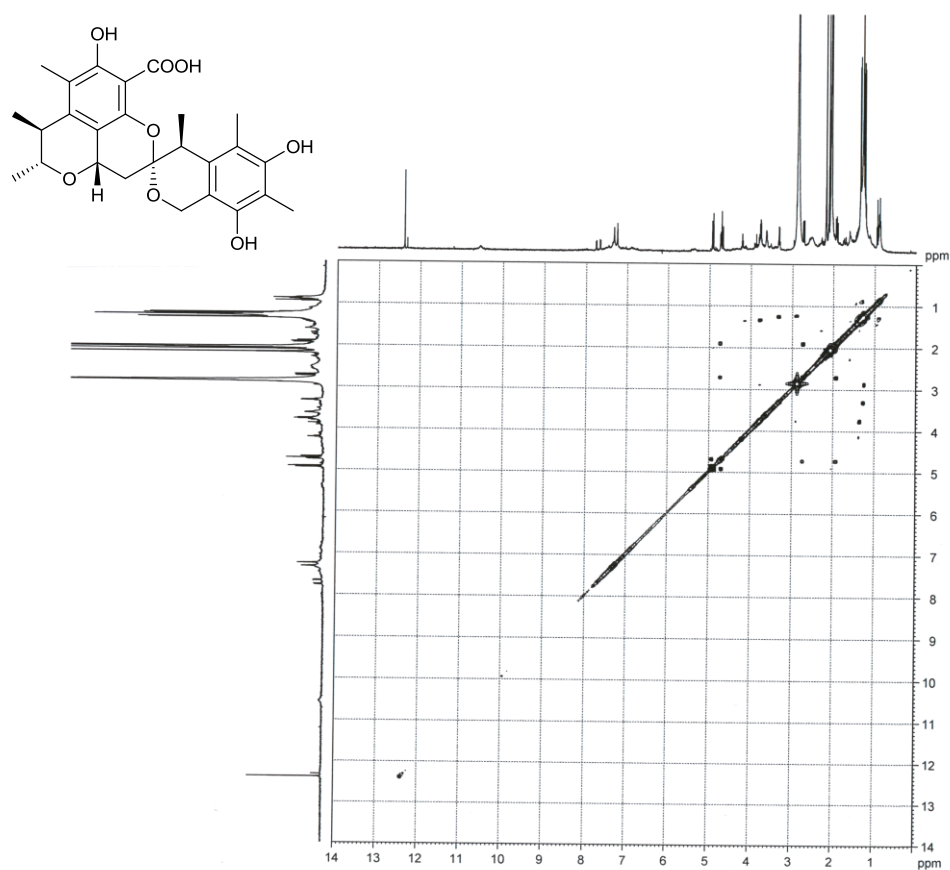

**Figure S85.** COSY spectrum of compound **15** (500 MHz, acetone- $d_6$ ).

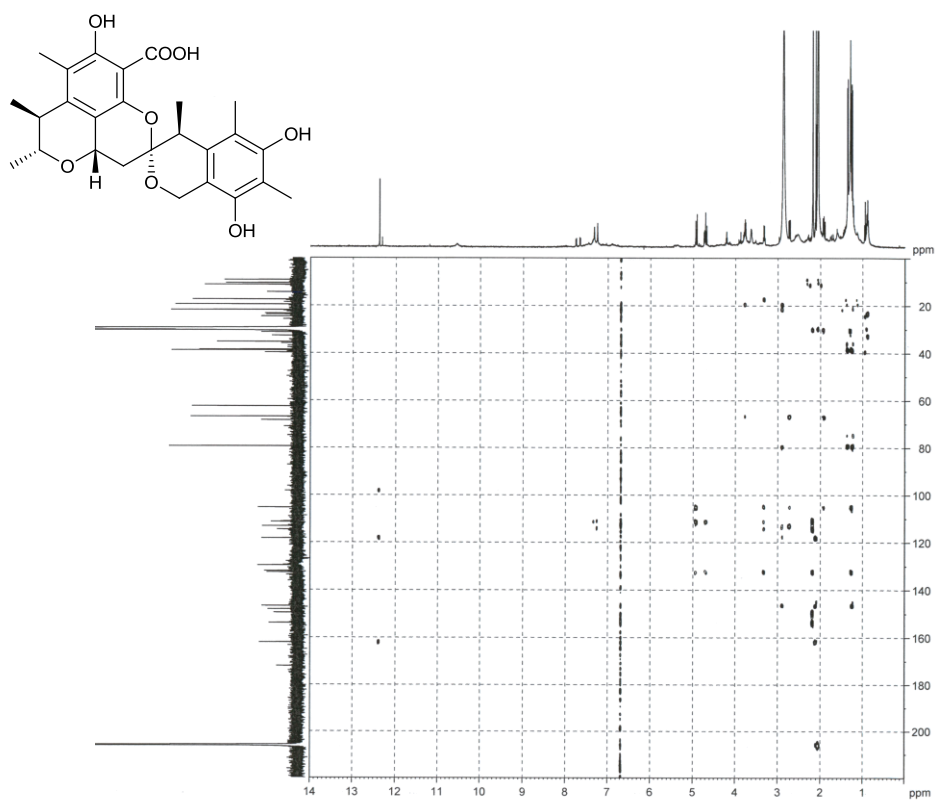

**Figure S86.** HMBC spectrum of compound **15** (500 MHz, acetone- $d_6$ ).

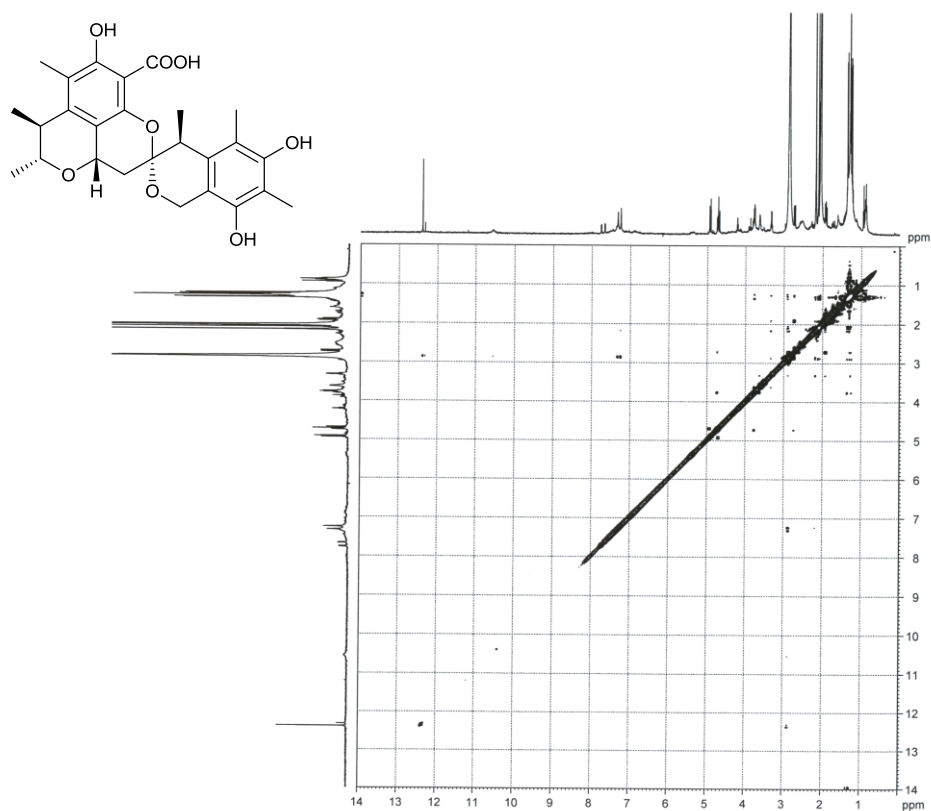

**Figure S87.** NOESY spectrum of compound **15** (500 MHz, acetone- $d_6$ ).

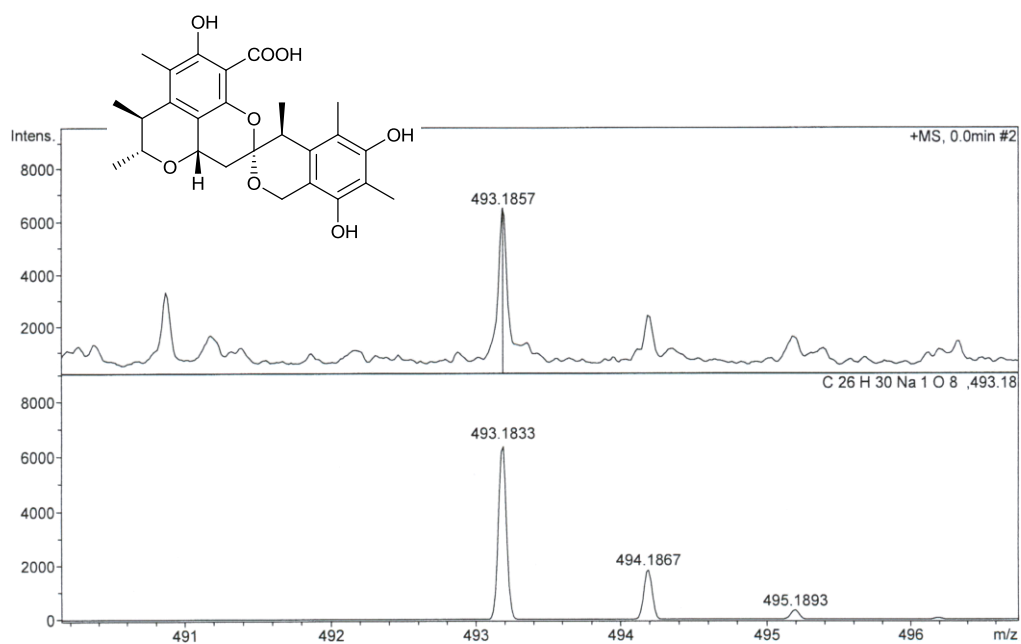

**Figure S88.** HRESIMS of compound **15**.

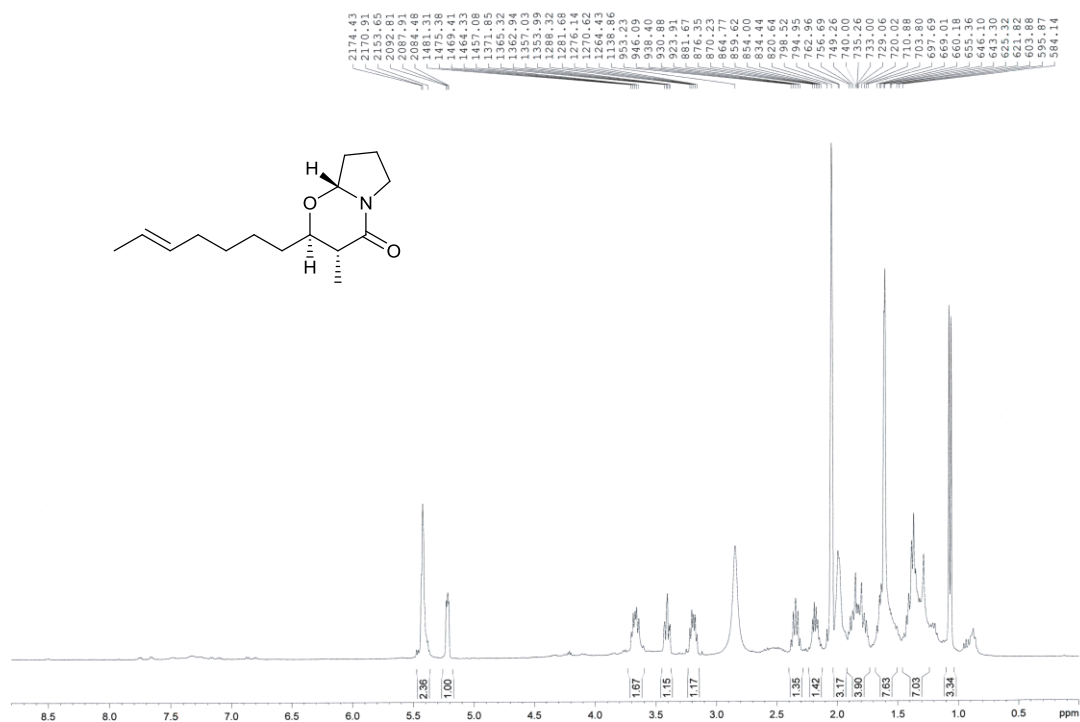

**Figure S89.**  $^1\text{H}$  NMR spectrum of compound **16** (400 MHz, acetone- $d_6$ ).

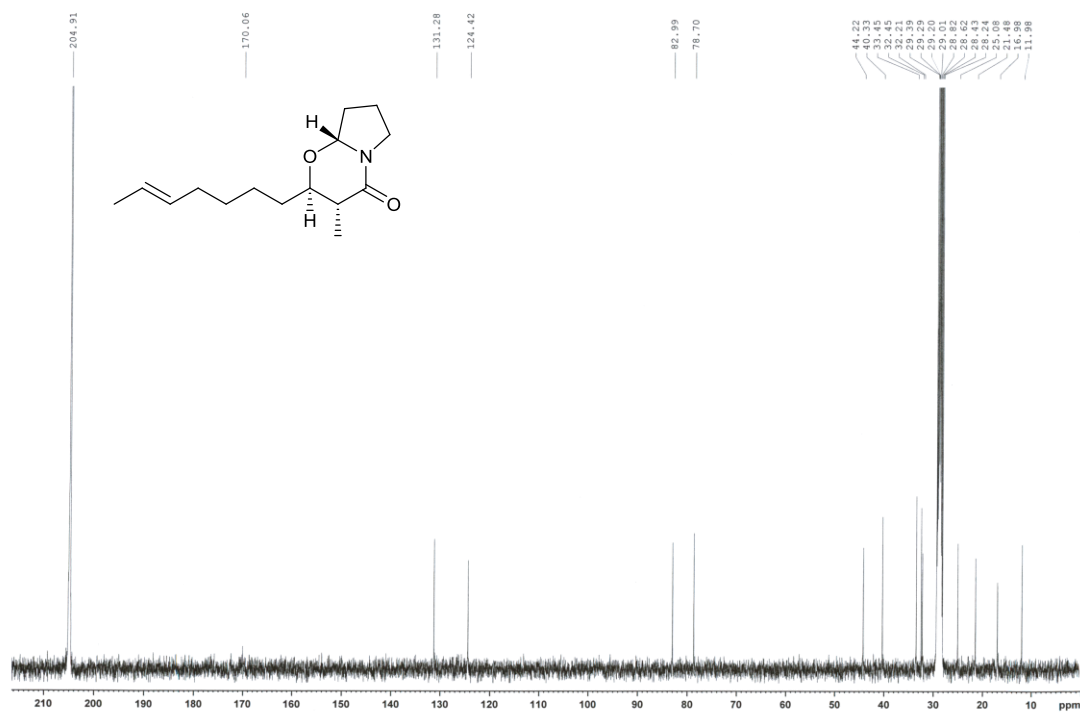

**Figure S90.**  $^{13}\text{C}$  NMR spectrum of compound **16** (100 MHz, acetone- $d_6$ ).

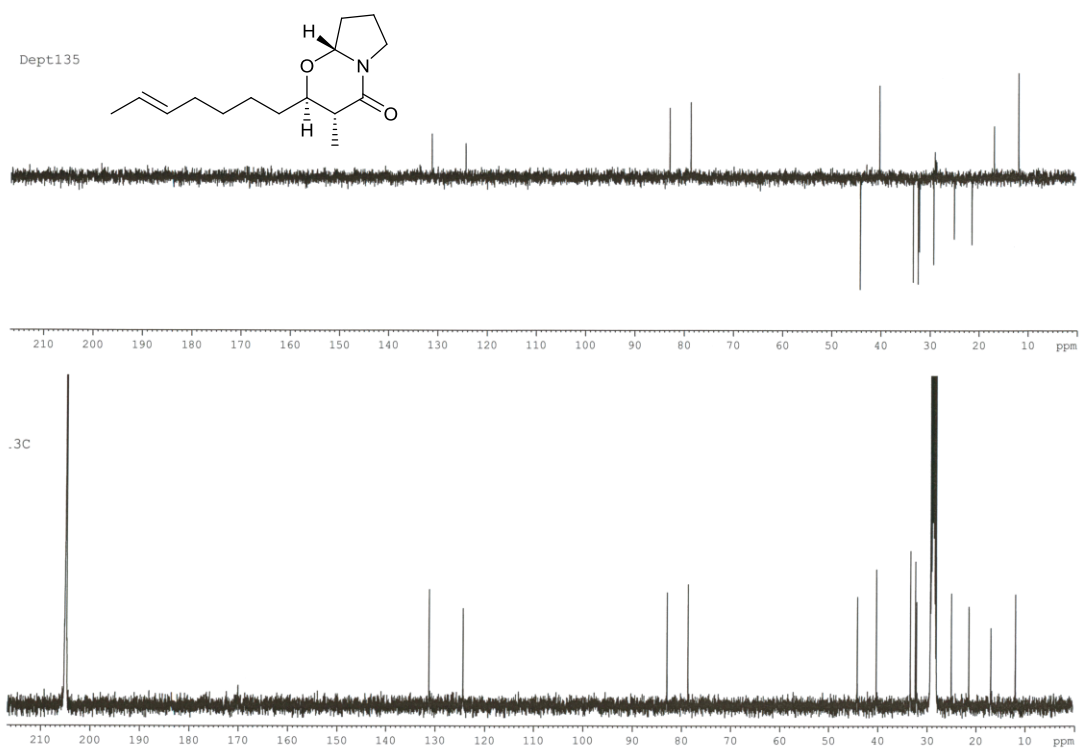

**Figure S91.** <sup>13</sup>C NMR and DEPT-135 spectra of compound **16** (100 MHz, acetone-*d*<sub>6</sub>).

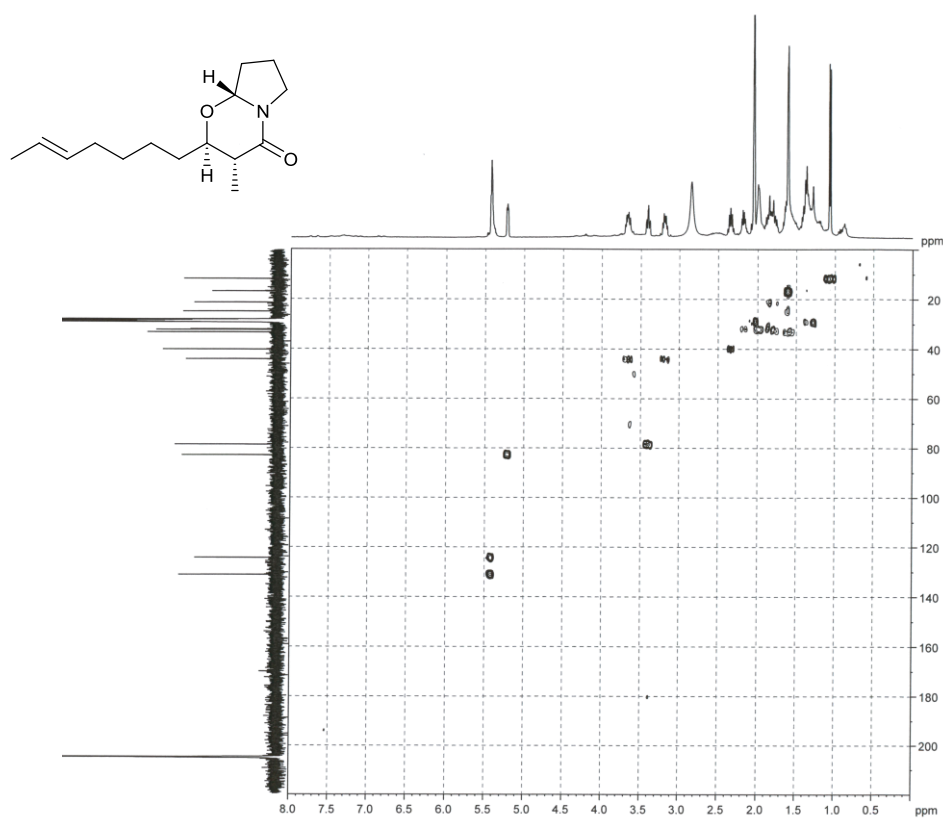

**Figure S92.** HMQC spectrum of compound **16** (400 MHz, acetone-*d*<sub>6</sub>).



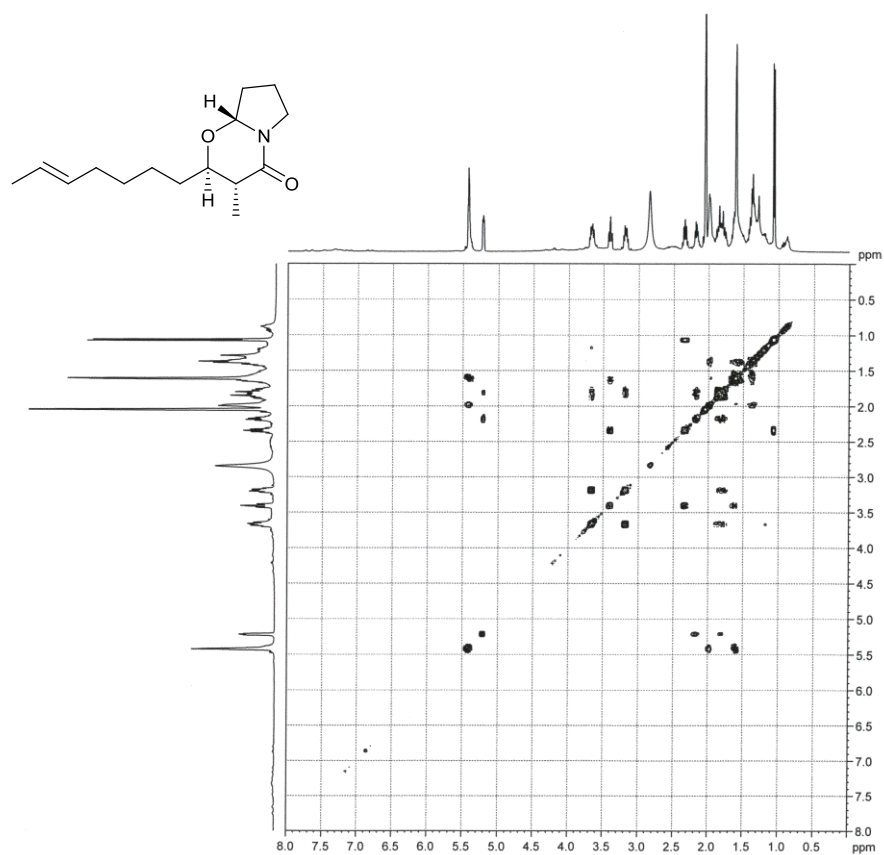

**Figure S93.** COSY spectrum of compound **16** (400 MHz, acetone- $d_6$ ).

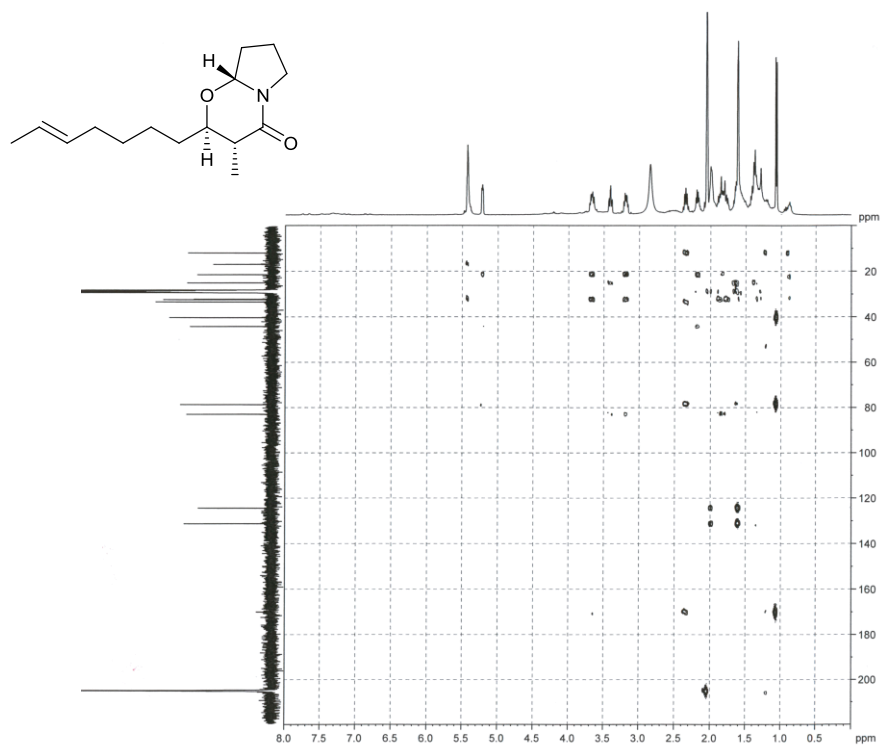

**Figure S94.** HMBC spectrum of compound **16** (400 MHz, acetone- $d_6$ ).

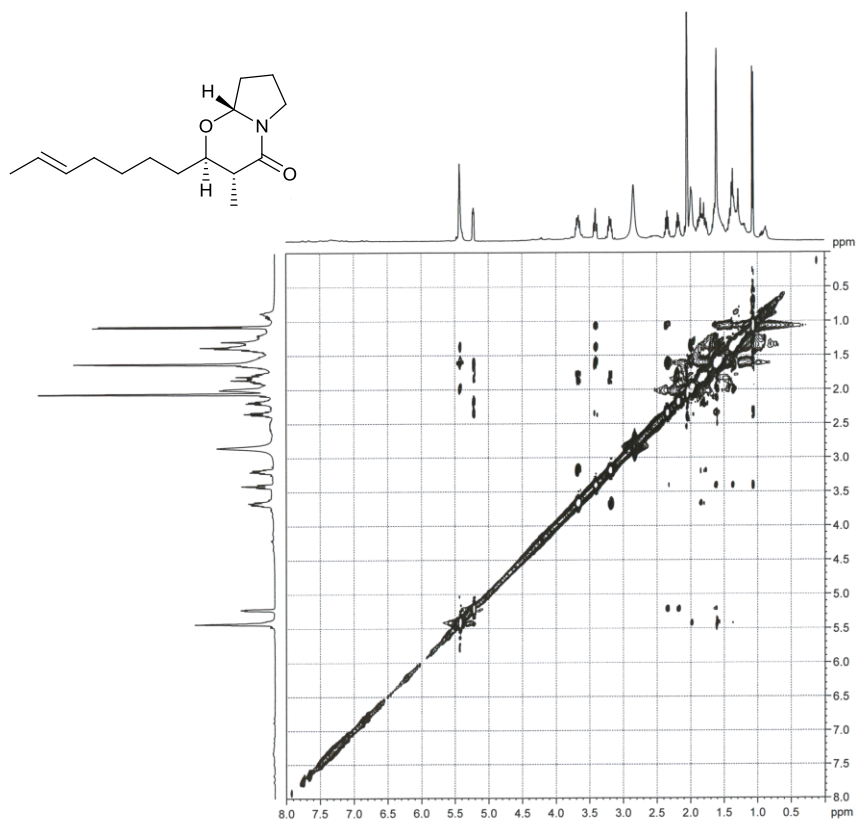

**Figure S95.** NOESY spectrum of compound **16** (400 MHz, acetone- $d_6$ ).

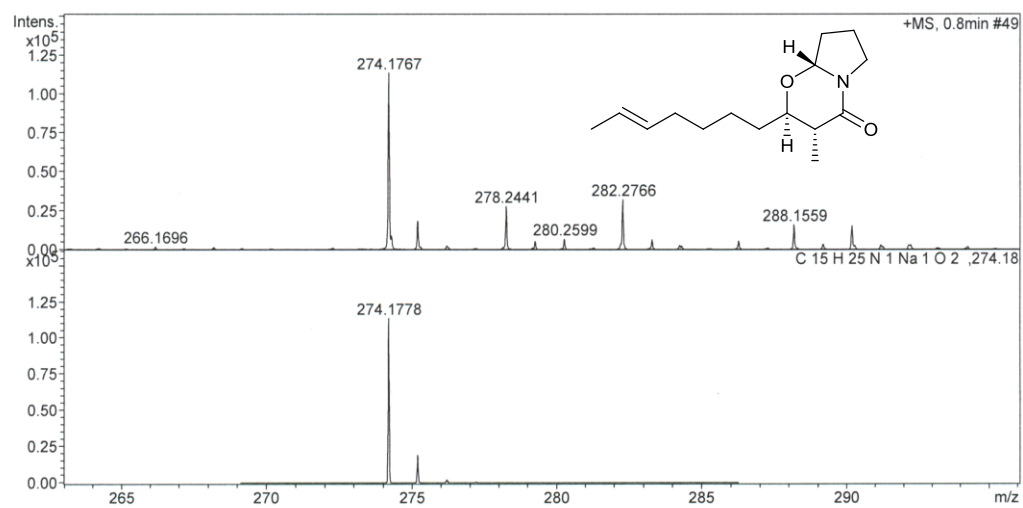

**Figure S96.** HRESIMS of compound **16**.
